# Supplementary material
Source: PubMed Central journal article supplement (PMC3254252)
Supplement: mmc1.pdf [file mmc1.pdf]

# THE LANCET

## Supplementary webappendix

This webappendix formed part of the original submission and has been peer reviewed. We post it as supplied by the authors.

Supplement to: Early Breast Cancer Trialists' Collaborative Group (EBCTCG). Effect of radiotherapy after breast-conserving surgery on 10-year recurrence and 15-year breast cancer death: meta-analysis of individual patient data for 10 801 women in 17 randomised trials. *Lancet* 2011; published online Oct 20. DOI:10.1016/S0140-6736(11)61629-2.

# Effect of radiotherapy after breast-conserving surgery on 10-year recurrence and 15-year breast cancer death: meta-analysis of individual patient data for 10,801 women in 17 randomised trials

Early Breast Cancer Trialists' Collaborative Group (EBCTCG)

**Webappendix** (click on page number to jump directly to it)

|              |                                                                                                                                                                                                                                                                                      | Page               |
|--------------|--------------------------------------------------------------------------------------------------------------------------------------------------------------------------------------------------------------------------------------------------------------------------------------|--------------------|
| Webtable 1   | Randomised trials comparing radiotherapy following breast-conserving surgery versus the same management without radiotherapy that began before the year 2000 — treatment details                                                                                                     | <a href="#">4</a>  |
| Webfigure 1a | Effect of radiotherapy (RT) after breast-conserving surgery (BCS) on 10-year risk of any (locoregional or distant) first recurrence and on 15-year risks of breast cancer mortality and all-cause mortality. Data from 10,801 women (67% pathologically node-negative) in 17 trials. | <a href="#">5</a>  |
| Webfigure 1b | Effect of radiotherapy (RT) after breast-conserving surgery (BCS) on 10-year risk of any (locoregional or distant) first recurrence and on 15-year risks of breast cancer mortality and all-cause mortality. Data from 7,287 women with pathologically node-negative disease.        | <a href="#">6</a>  |
| Webfigure 1c | Effect of radiotherapy (RT) after breast-conserving surgery (BCS) on 10-year risk of any (locoregional or distant) first recurrence and on 15-year risks of breast cancer mortality and all-cause mortality. Data from 1,050 women with pathologically node-positive disease.        | <a href="#">7</a>  |
| Webfigure 1d | Effect of radiotherapy (RT) after breast-conserving surgery (BCS) on 10-year risk of any (locoregional or distant) first recurrence and on 15-year risks of breast cancer mortality and all-cause mortality. Data from 2464 women with pathological node status unknown              | <a href="#">8</a>  |
| Webfigure 2a | 10-year risk of any first recurrence in trials of radiotherapy (RT) after breast-conserving surgery (BCS) by type of first recurrence and allocated treatment.                                                                                                                       | <a href="#">9</a>  |
| Webfigure 2b | 10-year risk of any first recurrence in trials of radiotherapy (RT) after breast-conserving surgery (BCS) by pathological nodal status, type of first recurrence and allocated treatment.                                                                                            | <a href="#">10</a> |
| Webfigure 2c | 10-year risk of any first recurrence in trials of radiotherapy (RT) after breast-conserving surgery (BCS) by surgery, oestrogen receptor status and whether tamoxifen was given to both trial arms or not at all, type of first recurrence and allocated treatment.                  | <a href="#">11</a> |
| Webfigure 2d | 10-year risk of any first recurrence in trials of radiotherapy (RT) after breast-conserving surgery (BCS) by surgery, oestrogen receptor status and whether tamoxifen was given to both trial arms or not at all, type of first recurrence and allocated treatment.                  | <a href="#">12</a> |
| Webfigure 3  | Proportional effect of radiotherapy (RT) after breast-conserving surgery (BCS) on time to first recurrence of any type (locoregional or distant) and on breast-cancer mortality in 10,801 women. Event rate ratios by period of follow-up.                                           | <a href="#">13</a> |
| Webfigure 4  | Proportional effect of radiotherapy (RT) after breast-conserving surgery (BCS). Event rate ratios for recurrence and for breast cancer mortality during years 0-9 in women with pathologically node-negative disease by prognostic and other factors.                                | <a href="#">14</a> |

|              |                                                                                                                                                                                                                                                                                      |                         |
|--------------|--------------------------------------------------------------------------------------------------------------------------------------------------------------------------------------------------------------------------------------------------------------------------------------|-------------------------|
| Webfigure 5a | Effect of radiotherapy (RT) after breast-conserving surgery (BCS) on any (locoregional or distant) first recurrence in pathologically node-negative women — 10-year risks by age at entry                                                                                            | Page <a href="#">15</a> |
| Webfigure 5b | Effect of radiotherapy (RT) after breast-conserving surgery (BCS) on any (locoregional or distant) first recurrence in pathologically node-negative women — 10-year risks according to tumour grade.                                                                                 | <a href="#">16</a>      |
| Webfigure 5c | Effect of radiotherapy (RT) after breast-conserving surgery (BCS) on any (locoregional or distant) first recurrence in pathologically node-negative women — 10-year risks according to tumour size..                                                                                 | <a href="#">17</a>      |
| Webfigure 5d | Effect of radiotherapy (RT) after breast-conserving surgery (BCS) on any (locoregional or distant) first recurrence in pathologically node-negative women — 10-year risks according to extent of surgery and ER-status & trial policy of tamoxifen use.                              | <a href="#">18</a>      |
| Webfigure 5e | Effect of radiotherapy (RT) after breast-conserving surgery (BCS) on any (locoregional or distant) first recurrence in pathologically node-negative women — 10-year risks according to trial category.                                                                               | <a href="#">19</a>      |
| Webfigure 6a | Statistical method for modelling the absolute risk of any (locoregional or distant) first recurrence in women allocated to radiotherapy (RT) and the reduction in absolute risk of any (locoregional or distant) first recurrence at 10 years.                                       | <a href="#">20</a>      |
| Webfigure 6b | Model, using the method described in webappendix p20, for the dependence on prognostic and other factors of the absolute 10-year rate of any (locoregional or distant) first recurrence rate in women with pN0 disease allocated to radiotherapy.                                    | <a href="#">21</a>      |
| Webfigure 6c | Correlation matrix for estimates of parameters in model for dependence on prognostic and other factors of the absolute 10-year rate of any (locoregional or distant) first recurrence rate in women with pN0 disease allocated to radiotherapy.                                      | <a href="#">22</a>      |
| Webfigure 6d | Model for the dependence of the absolute reduction in 10-year rate of any (locoregional or distant) first recurrence rate in women with pN0 disease on prognostic and other factors derived using the method described in webappendix p20.                                           | <a href="#">23</a>      |
| Webfigure 6e | Correlation matrix for estimates of parameters in model for dependence of the absolute reduction in 10-year rate of any (locoregional or distant) first recurrence rate in women with pN0 disease on prognostic and other factors derived using the method described in webfigure 6. | <a href="#">24</a>      |
| Webfigure 6f | Relationship between recurrence rate per 100 woman-years and 10-year cumulative risk of recurrence.                                                                                                                                                                                  | <a href="#">25</a>      |
| Webtable 2   | Effect of radiotherapy (RT) after breast-conserving surgery (BCS) on 10-year risk (%) of first recurrence of any type (locoregional or distant) in 7287 pathologically node-negative women according to prognostic and other factors.                                                | <a href="#">26</a>      |
| Webfigure 7  | Absolute reduction in 10-year risk (%) of any (locoregional or distant) first recurrence from radiotherapy (RT) after breast-conserving surgery (BCS) in pathologically node-negative women: dependence on prognostic and other factors suggested by modelling data from 7287 women. | <a href="#">27</a>      |
| Webtable 3a  | 10-year risk (%) of any (locoregional or distant) first recurrence according to prognostic and other factors: Absolute reduction with radiotherapy (RT) after breast-conserving surgery (BCS) in pathologically node negative women.                                                 | <a href="#">28</a>      |
| Webtable 3b  | 10-year risk (%) of any (locoregional or distant) first recurrence according to prognostic and other factors: Absolute risks in pathologically node negative women allocated to breast-conserving surgery (BCS) and BCS+ radiotherapy (RT).                                          | <a href="#">29</a>      |
| Webtable 3c  | Numbers of pathologically node negative women in trials of radiotherapy after breast-conserving surgery according to prognostic and other factors.                                                                                                                                   | <a href="#">30</a>      |
| Webtable 4   | 5-year risks of any (locoregional or distant) first recurrence in pathologically node negative women allocated to breast-conserving surgery (BCS) and radiotherapy (RT) or to BCS only according to prognostic and other factors.                                                    | <a href="#">31</a>      |

|               |                                                                                                                                                                                                                                                                                                                                         |                         |
|---------------|-----------------------------------------------------------------------------------------------------------------------------------------------------------------------------------------------------------------------------------------------------------------------------------------------------------------------------------------|-------------------------|
| Webfigure 8   | Absolute reduction in 5-year risk (%) of any (locoregional or distant) first recurrence from radiotherapy (RT) after breast-conserving surgery (BCS) in pathologically node-negative women: dependence on prognostic and other factors suggested by modelling data from 7287 women.                                                     | Page <a href="#">32</a> |
| Webtable 5a   | 5-year risk (%) of any (locoregional or distant) first recurrence according to prognostic and other factors: Absolute reduction with radiotherapy (RT) after breast-conserving surgery (BCS) in pathologically node negative women.                                                                                                     | <a href="#">33</a>      |
| Webtable 5b   | 5-year risk (%) of any (locoregional or distant) first recurrence according to prognostic and other factors: Absolute risks in pathologically node negative women allocated to breast-conserving surgery (BCS) and BCS+ radiotherapy (RT).                                                                                              | <a href="#">34</a>      |
| Webtable 6    | Risks of any (locoregional or distant) first recurrence and breast cancer mortality in 7287 pathologically node-negative women given breast-conserving surgery (BCS) according to predicted absolute benefit with radiotherapy (RT) in 10-year risk suggested by modelling of prognostic and other factors.                             | <a href="#">35</a>      |
| Webfigure 9a  | Risks of any (locoregional or distant) first recurrence in 7287 pathologically node-negative women given breast-conserving surgery (BCS) according to predicted absolute benefit with radiotherapy (RT) in 10-year risk suggested by modelling of prognostic and other factors.                                                         | <a href="#">36</a>      |
| Webfigure 9b  | Risks of breast cancer mortality in 7287 pathologically node-negative women given breast-conserving surgery (BCS) according to predicted absolute benefit with radiotherapy (RT) in 10-year risk suggested by modelling of prognostic and other factors.                                                                                | <a href="#">37</a>      |
| Webfigure 9c  | 10-year risk of any first recurrence in 7287 pathologically node-negative women in trials of radiotherapy (RT) after breast-conserving surgery (BCS) according to predicted absolute benefit with radiotherapy in 10-year risk suggested by modelling of prognostic and other factors, type of first recurrence and allocated treatment | <a href="#">38</a>      |
| Webfigure 10  | Proportional effect of radiotherapy (RT) after breast-conserving surgery (BCS). Event rate ratios for recurrence and for breast cancer mortality during years 0-9 in women with pathologically node-positive disease by prognostic and other factors.                                                                                   | <a href="#">40</a>      |
| Webtable 7a   | Effect of radiotherapy (RT) after breast-conserving surgery (BCS) on 10-year risk (%) of first recurrence of any type (locoregional or distant) in 1050 pathologically node-positive women according to prognostic and other factors.                                                                                                   | <a href="#">41</a>      |
| Webtable 7b   | Effect of radiotherapy (RT) after breast-conserving surgery (BCS) on 5-year risk (%) of first recurrence of any type (locoregional or distant) in 1050 pathologically node-positive women according to prognostic and other factors.                                                                                                    | <a href="#">42</a>      |
| Webfigure 11a | Effect of radiotherapy (RT) after breast-conserving surgery (BCS) in pathologically node-positive women — 10-year risks of any (locoregional or distant) first recurrence by number of positive axillary nodes.                                                                                                                         | <a href="#">43</a>      |
| Webfigure 11b | Effect of radiotherapy (RT) after breast-conserving surgery (BCS) in pathologically node-positive women — 10-year risks of any (locoregional or distant) first recurrence by ER status and tamoxifen use.                                                                                                                               | <a href="#">44</a>      |
| Webfigure 12a | Effect of radiotherapy after breast-conserving surgery on any (locoregional or distant) first recurrence, breast cancer mortality and all-cause mortality in 7287 women with pathologically node-negative disease.                                                                                                                      | <a href="#">45</a>      |
| Webfigure 12b | Effect of radiotherapy after breast-conserving surgery on any (locoregional or distant) first recurrence, breast cancer mortality and all-cause mortality in 1050 women with pathologically node-positive disease.                                                                                                                      | <a href="#">46</a>      |
| Webfigure 12c | Effect of radiotherapy after breast-conserving surgery on any (locoregional or distant) first recurrence, breast cancer mortality and all-cause mortality in 2464 women with unknown pathological nodal status disease.                                                                                                                 | <a href="#">47</a>      |
| Webfigure 13  | List of EBCTCG collaborators.                                                                                                                                                                                                                                                                                                           | <a href="#">48</a>      |

**Webtable 1: Randomised trials comparing radiotherapy following breast-conserving surgery versus the same management without radiotherapy that began before the year 2000 — treatment details**

| Year, code and study name                                                                        | Breast conserving surgery* | Axillary treatment                    | Breast irradiation                        | Boost irradiation            | Regional nodal irradiation                             | Systemic chemoendocrine therapy common to both trial arms |
|--------------------------------------------------------------------------------------------------|----------------------------|---------------------------------------|-------------------------------------------|------------------------------|--------------------------------------------------------|-----------------------------------------------------------|
| <b>A. Trials evaluating the benefit of radiotherapy after lumpectomy</b>                         |                            |                                       |                                           |                              |                                                        |                                                           |
| 76B NSABP B-06                                                                                   | Lumpectomy                 | Levels I & II                         | 50 Gy (2 Gy/f) c or m                     | None                         | None                                                   | pN+: FMeI                                                 |
| 82Y St George's                                                                                  | Lumpectomy                 | Levels I +/- AF RT†                   | 54 Gy d (2 Gy/f) m                        | 10 Gy (2 Gy/f) o or e        | 0-50 Gy (2 Gy/f) m (IMC and SC/AF)†                    | ER+: 2 yr tam; ER-: CMF                                   |
| 84P Ontario COG                                                                                  | Lumpectomy                 | Levels I & II                         | 40 Gy (2.5 Gy/f) c                        | 12.5 Gy (2.5 Gy/f) c         | None                                                   | None                                                      |
| 85B Scottish                                                                                     | Lumpectomy‡                | Sample+ AF RT† or Levels I, II & III  | 50 Gy (2-2.5 Gy/f) m                      | 10-30 Gy (2-3 Gy/f) o,e or i | 50 Gy (2-2.5 Gy/f) m (IMC), 0-45 (2.3 Gy/f) m (SC/AF)† | ER+: 5 yr tam; ER-: CMF                                   |
| 85D West Midlands                                                                                | Lumpectomy§                | AF RT†                                | 40 Gy (2.7 Gy/f) or 50 Gy (2 Gy/f) d c    | 15 Gy (3 Gy/f) e/c           | 40 Gy (2.7 Gy/f) or 50 Gy (2 Gy/f) c (SC/AF)†          | 2 yr tam                                                  |
| 86C CRC UK                                                                                       | Lumpectomy§                | Various                               | Various                                   | Various                      | Various                                                | Various                                                   |
| <b>B. Trials evaluating the benefit of radiotherapy after sector resection or quadrantectomy</b> |                            |                                       |                                           |                              |                                                        |                                                           |
| 81L Uppsala-Örebro                                                                               | Sector resection           | Levels I & II                         | 54 Gy (2 Gy/f) c or m                     | None                         | None                                                   | None                                                      |
| 87R INT Milan III                                                                                | Quadrantectomy             | Levels I, II & III                    | 50 Gy (2 Gy/f) c or m                     | 10 Gy (2 Gy/f) o or e        | None                                                   | pN+: CMF or tam                                           |
| 90M Tampere                                                                                      | Sector resection           | Levels I & II                         | 50 Gy (2 Gy/f) m                          | None                         | None                                                   | None                                                      |
| 91P SweBCG 91-RT                                                                                 | Sector resection           | Levels I & II                         | 48-54 Gy (1.9-2.2 Gy/f) m                 | None                         | None                                                   | Tam, CMF, or none**                                       |
| <b>C. Trials evaluating the need for radiotherapy after lumpectomy in low risk women</b>         |                            |                                       |                                           |                              |                                                        |                                                           |
| 89L NSABP B-21                                                                                   | Lumpectomy                 | Levels I & II                         | 50 Gy (2 Gy/f) c or m                     | 10 Gy (2 Gy/f) o¶            | None                                                   | 5 yr tam                                                  |
| 91J GBSG V Germany                                                                               | Lumpectomy                 | Levels I & II                         | 50 Gy (2 Gy/f) m                          | 10-12 Gy (2.0 Gy/f) e        | None                                                   | 2 yr tam (in 2 of 4 trial arms)                           |
| 92A PMH Toronto                                                                                  | Lumpectomy                 | Levels I & II                         | 40 Gy (2.5 Gy/f) or 50 Gy (2 Gy/f) c or m | 12.5 Gy (2.5 Gy/f) o or e¶   | None                                                   | 5yr tam                                                   |
| 92P BASO II                                                                                      | Lumpectomy§                | Sample                                | 45-50Gy (2-2.3 Gy/f) m                    | 10-15 Gy (2-3 Gy/f) e        | None                                                   | 5 yr tam (in 2 of 4 trial arms)                           |
| 94C CALGB 9343††                                                                                 | Lumpectomy                 | None or Levels I & II ‡‡              | 45 Gy (1.8 Gy/f) c or m                   | 14 Gy (2 Gy/f) e             | None                                                   | 5 yr tam                                                  |
| 96Y ABCSG 8a††                                                                                   | Lumpectomy                 | SLN or Levels I & II                  | 50 Gy (2 Gy/f) c or m                     | 10 Gy (0-2 Gy/f) e or I ¶    | None                                                   | 5 yr yr tam or 2 yr tam then 3 yr anastrozole             |
| 99W PRIME 1††                                                                                    | Lumpectomy                 | Sample or Levels I, II & III or SLN‡‡ | 45-50Gy (2-2.3 Gy/f) m                    | 0-15 Gy (0-2 Gy/f) e         | None                                                   | 5 yr tam                                                  |

AF=axillary fossa, c=cobalt-60, C=cyclophosphamide, d=maximum tissue dose, e=electron, ER=oestrogen receptor, F=5-fluorouracil, f=fraction, Gy=Gray (intended dose), i =iridium-192, IMC=internal mammary chain, m=megavoltage (linear accelerator), M=methotrexate, Mel=melphalan, o=orthovoltage, pN+=pathologically node-positive, Quad=quadrantectomy, sample=sampling, RT=radiotherapy, SC=supraclavicular fossa, SLN=sentinel lymph node procedure, tam=tamoxifen.

\* Negative surgical margins required, unless otherwise specified.

† Among those randomised to radiotherapy: IMC RT for medial tumours (19% of women, St. George's), and supraclavicular/axillary radiotherapy for all (West Midlands), for pN+ (28%, St. George's), or after axillary sampling surgery (60%, Scottish).

‡ Negative surgical margins not required.

§ Margin status not specified.

¶ Among those randomized to radiotherapy: boost in 25% (NSABP B-21), 97% (PMH Toronto), or 65% (ABCSG 8a).

\*\* Tamoxifen in 7%, and CMF in 2% (all with tumours > 2 cm in size).

†† Trials with low-risk patients, i.e. all patients with pT1-2, c or pN-, negative surgical margins and either older age (≥ 65), post-menopausal status, and/or ER+ tumours.

‡‡ No axillary surgery (64%) or level I & II dissection (36%) in CALGB 9343. Axillary sampling (73%), or level I, II & III dissection (26%), or sentinel lymph node procedure (1%) in PRIME 1.

**Webfigure 1a. Effect of radiotherapy (RT) after breast-conserving surgery (BCS) on 10-year risk of any (locoregional or distant) first recurrence and on 15-year risks of breast cancer mortality and all-cause mortality. Data from 10,801 women (67% pathologically node-negative) in 17 trials.** Vertical lines indicate 1 SE above or below the 5, 10 and 15 year percentages.

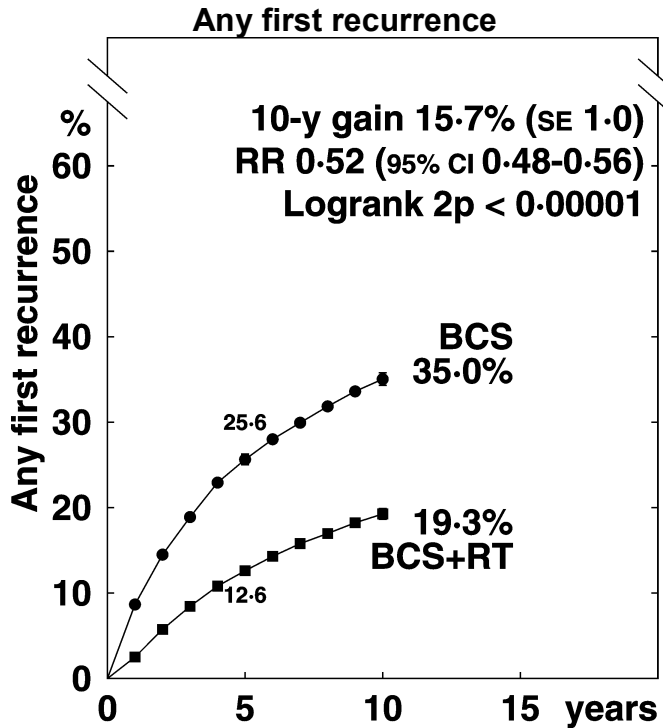

any first recurrence rates (% / year) and logrank analyses

|                            | Years 0 - 4                    | Years 5 - 9                   | Year 10+                   |
|----------------------------|--------------------------------|-------------------------------|----------------------------|
| BCS+RT                     | 2.98 (705 / 23657)             | 1.74 (265 / 15239)            | 1.20 (125 / 10414)         |
| BCS                        | 5.97 (1274 / 21324)            | 2.74 (338 / 12339)            | 0.96 (76 / 7915)           |
| Rate ratio, from (O-E) / V | 0.46 SE 0.03<br>-339.0 / 435.1 | 0.59 SE 0.07<br>-73.6 / 140.0 | 1.17 SE 0.16<br>7.1 / 45.0 |

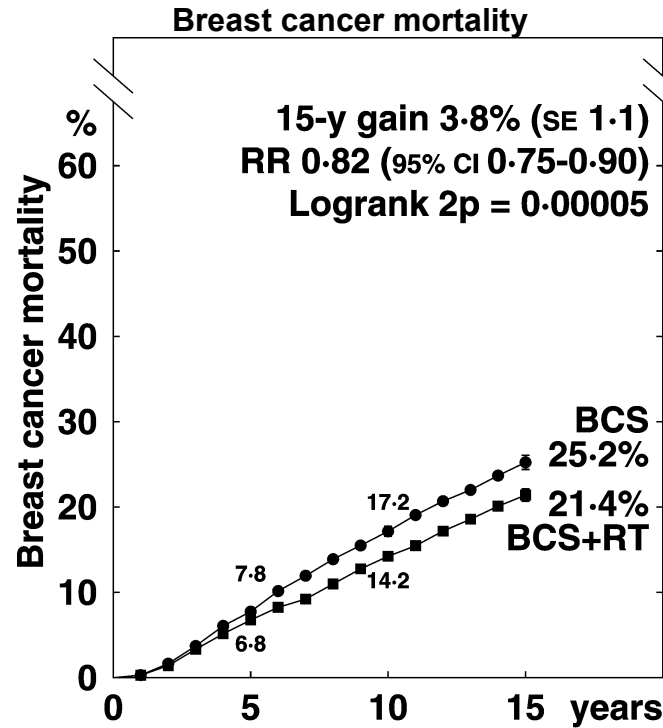

After-recurrence or possible-breast-cancer death rates (% / year) and logrank analyses

|                            | Years 0 - 4                   | Years 5 - 9                   | Years 10 - 14                | Year 15+                    |
|----------------------------|-------------------------------|-------------------------------|------------------------------|-----------------------------|
| BCS+RT                     | 1.36 SE 0.07                  | 1.59 SE 0.10                  | 1.62 SE 0.14                 | 2.22 SE 0.23                |
| BCS                        | 1.61 SE 0.08                  | 2.25 SE 0.12                  | 2.21 SE 0.16                 | 2.62 SE 0.27                |
| Rate ratio, from (O-E) / V | 0.87 SE 0.07<br>-24.0 / 170.0 | 0.75 SE 0.07<br>-42.6 / 151.1 | 0.84 SE 0.11<br>-13.6 / 75.9 | 0.89 SE 0.14<br>-5.1 / 43.3 |

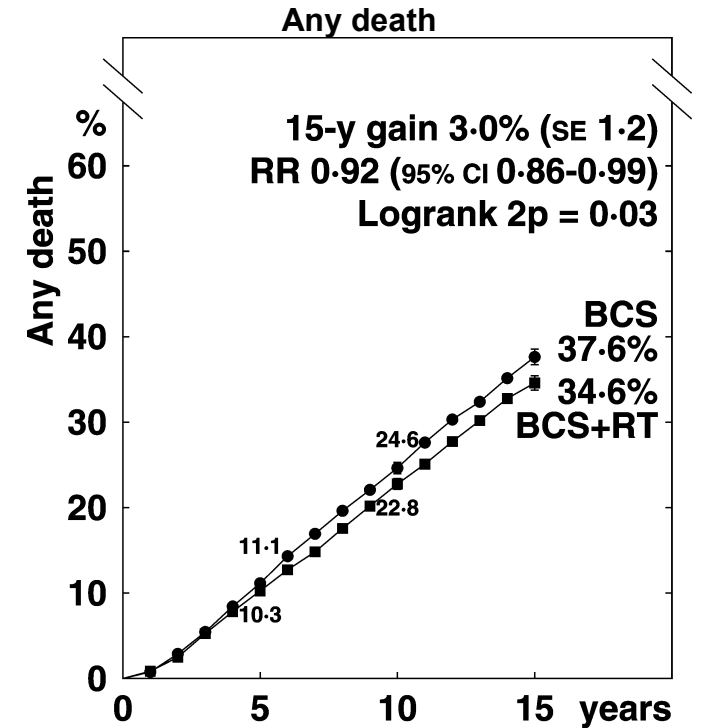

Death rates (% / year) and logrank analyses

|                            | Years 0 - 4                   | Years 5 - 9                   | Years 10 - 14                 | Year 15+                   |
|----------------------------|-------------------------------|-------------------------------|-------------------------------|----------------------------|
| BCS+RT                     | 2.12 (532 / 25074)            | 2.96 (515 / 17410)            | 3.31 (293 / 8848)             | 4.83 (196 / 4062)          |
| BCS                        | 2.33 (573 / 24608)            | 3.32 (553 / 16642)            | 3.82 (317 / 8292)             | 4.39 (164 / 3735)          |
| Rate ratio, from (O-E) / V | 0.92 SE 0.06<br>-22.7 / 259.7 | 0.89 SE 0.06<br>-27.8 / 250.5 | 0.88 SE 0.08<br>-18.2 / 141.1 | 1.12 SE 0.12<br>8.7 / 80.1 |

**Webfigure 1b. Effect of radiotherapy (RT) after breast-conserving surgery (BCS) on 10-year risk of any (locoregional or distant) first recurrence and on 15-year risks of breast cancer mortality and all-cause mortality. Data from 7,287 women with pathologically node-negative disease. Vertical lines indicate 1 SE above or below the 5, 10 and 15 year percentages.**

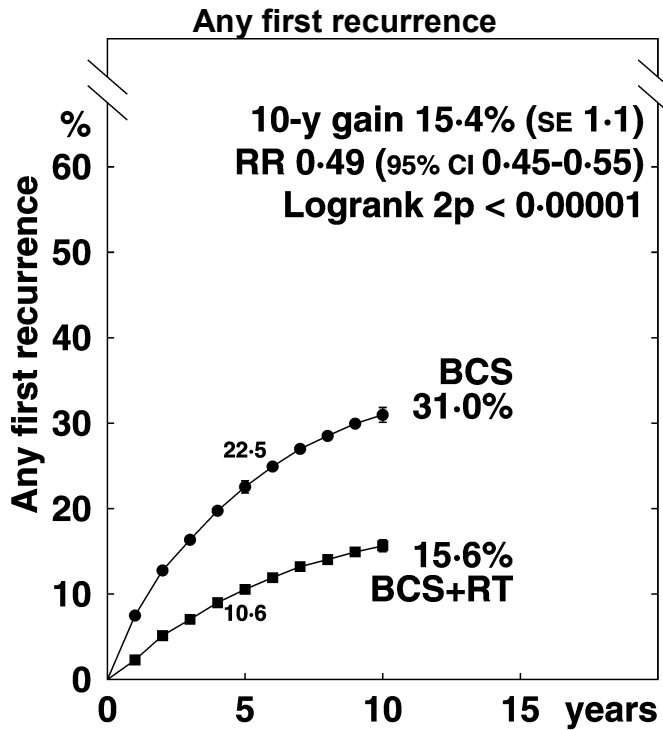

any first recurrence rates (% / year) and logrank analyses

|                            | Years 0 - 4                    | Years 5 - 9                  | Year 10+                   |
|----------------------------|--------------------------------|------------------------------|----------------------------|
| BCS+RT                     | 2.45 (396 / 16180)             | 1.31 (135 / 10341)           | 0.94 (63 / 6676)           |
| BCS                        | 5.17 (763 / 14771)             | 2.41 (205 / 8507)            | 0.77 (40 / 5212)           |
| Rate ratio, from (O-E) / V | 0.45 SE 0.04<br>-212.2 / 263.0 | 0.52 SE 0.08<br>-53.8 / 81.4 | 1.25 SE 0.23<br>5.4 / 24.4 |

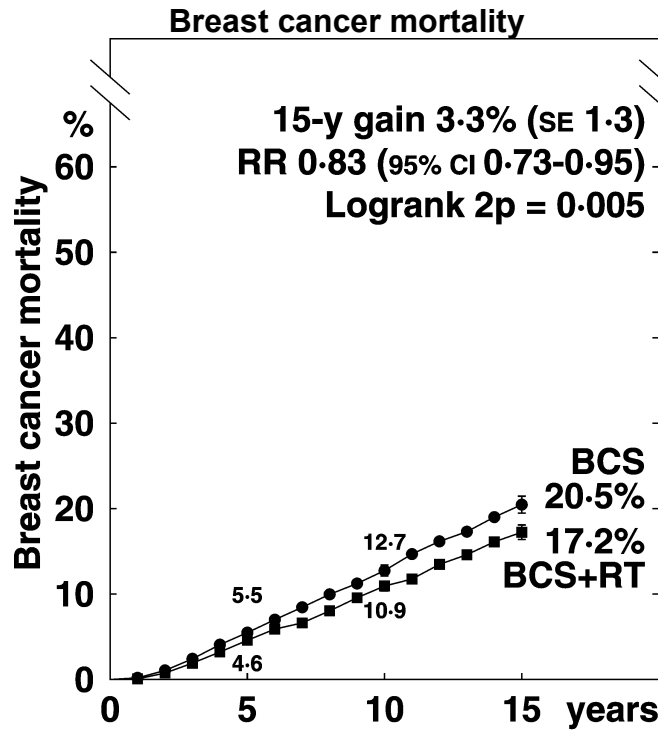

After-recurrence or possible-breast-cancer death rates (% / year) and logrank analyses

|                            | Years 0 - 4                  | Years 5 - 9                  | Years 10 - 14                | Year 15+                    |
|----------------------------|------------------------------|------------------------------|------------------------------|-----------------------------|
| BCS+RT                     | 0.90 SE 0.07                 | 1.28 SE 0.10                 | 1.30 SE 0.15                 | 2.13 SE 0.28                |
| BCS                        | 1.12 SE 0.08                 | 1.68 SE 0.12                 | 2.02 SE 0.19                 | 2.61 SE 0.33                |
| Rate ratio, from (O-E) / V | 0.83 SE 0.10<br>-15.7 / 82.7 | 0.85 SE 0.10<br>-13.7 / 82.8 | 0.76 SE 0.13<br>-12.3 / 44.9 | 0.95 SE 0.18<br>-1.5 / 27.7 |

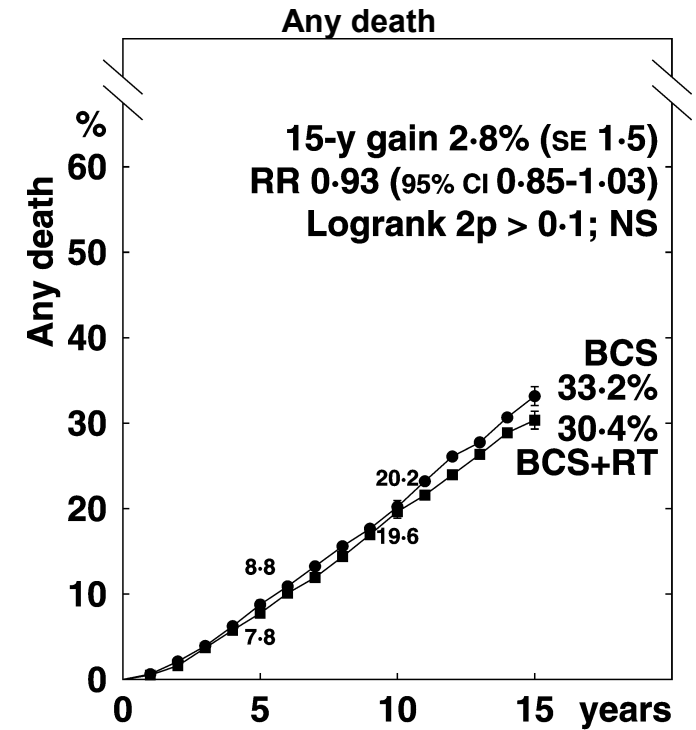

Death rates (% / year) and logrank analyses

|                            | Years 0 - 4                   | Years 5 - 9                 | Years 10 - 14                | Year 15+                   |
|----------------------------|-------------------------------|-----------------------------|------------------------------|----------------------------|
| BCS+RT                     | 1.58 (271 / 17127)            | 2.70 (319 / 11816)          | 2.85 (164 / 5762)            | 4.75 (125 / 2630)          |
| BCS                        | 1.80 (303 / 16842)            | 2.66 (306 / 11499)          | 3.58 (200 / 5584)            | 4.61 (113 / 2449)          |
| Rate ratio, from (O-E) / V | 0.88 SE 0.08<br>-17.8 / 139.5 | 1.02 SE 0.08<br>3.4 / 151.2 | 0.80 SE 0.10<br>-19.0 / 87.3 | 1.06 SE 0.14<br>3.4 / 54.5 |

**Webfigure 1c. Effect of radiotherapy (RT) after breast-conserving surgery (BCS) on 10-year risk of any (locoregional or distant) first recurrence and on 15-year risks of breast cancer mortality and all-cause mortality. Data from 1,050 women with pathologically node-positive disease. Vertical lines indicate 1 SE above or below the 5, 10 and 15 year percentages.**

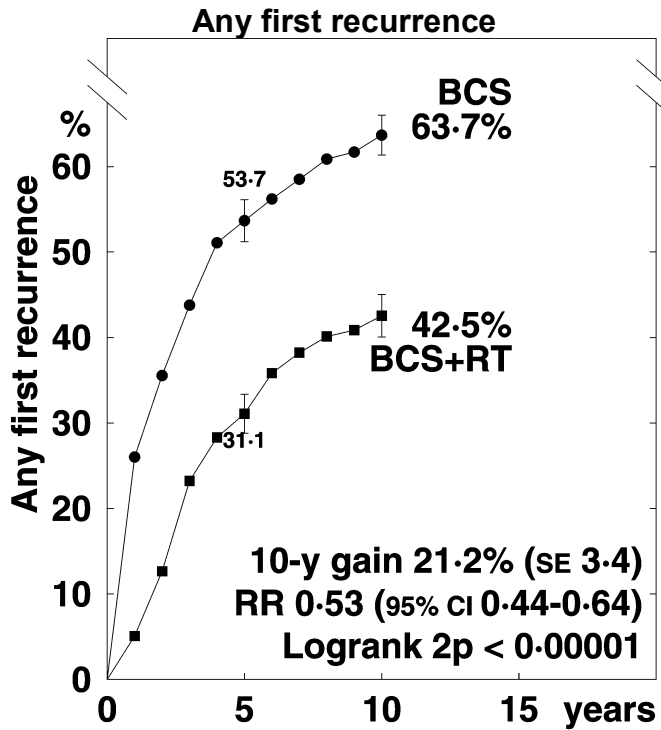

any first recurrence rates (% / year) and logrank analyses

|                            | Years 0 - 4                  | Years 5 - 9                 | Year 10+                  |
|----------------------------|------------------------------|-----------------------------|---------------------------|
| BCS+RT                     | 8.04 (162 / 2014)            | 4.14 (55 / 1329)            | 1.90 (30 / 1578)          |
| BCS                        | 16.77 (263 / 1568)           | 4.67 (43 / 921)             | 1.39 (15 / 1083)          |
| Rate ratio, from (O-E) / V | 0.44 SE 0.07<br>-68.8 / 84.9 | 0.76 SE 0.20<br>-5.5 / 20.1 | 1.18 SE 0.35<br>1.6 / 9.4 |

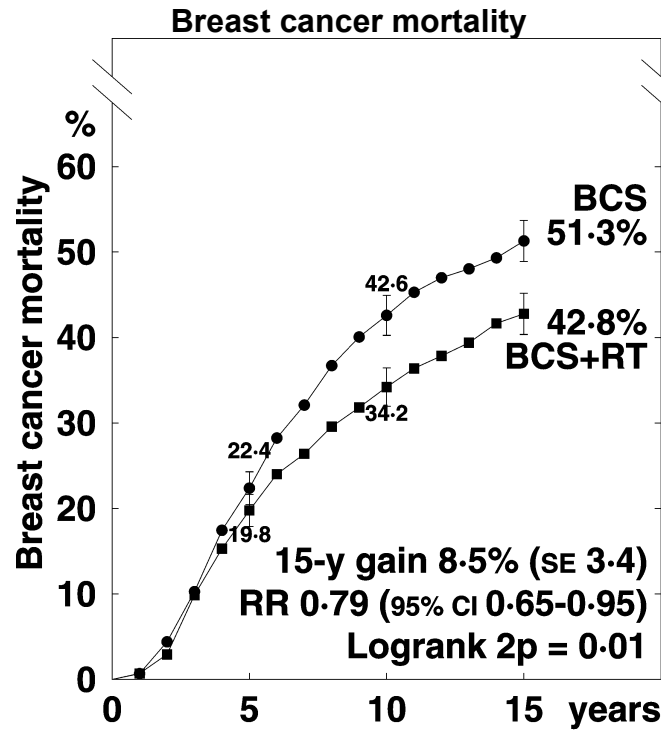

After-recurrence or possible-breast-cancer death rates (% / year) and logrank analyses

|                            | Years 0 - 4                 | Years 5 - 9                  | Years 10 - 14               | Year 15+                    |
|----------------------------|-----------------------------|------------------------------|-----------------------------|-----------------------------|
| BCS+RT                     | 4.33 SE 0.43                | 3.97 SE 0.48                 | 2.91 SE 0.50                | 2.78 SE 0.56                |
| BCS                        | 4.83 SE 0.46                | 6.27 SE 0.64                 | 3.24 SE 0.56                | 3.02 SE 0.62                |
| Rate ratio, from (O-E) / V | 0.87 SE 0.14<br>-6.5 / 45.1 | 0.65 SE 0.13<br>-15.8 / 36.7 | 0.84 SE 0.24<br>-2.6 / 15.3 | 0.93 SE 0.29<br>-0.8 / 10.7 |

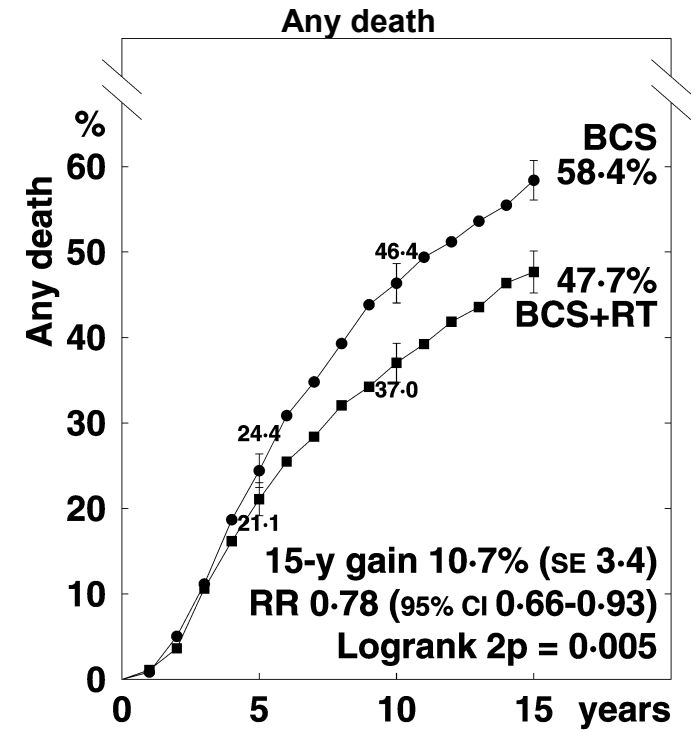

Death rates (% / year) and logrank analyses

|                            | Years 0 - 4                 | Years 5 - 9                  | Years 10 - 14               | Year 15+                   |
|----------------------------|-----------------------------|------------------------------|-----------------------------|----------------------------|
| BCS+RT                     | 4.72 (108 / 2289)           | 4.62 (78 / 1689)             | 4.02 (47 / 1168)            | 4.68 (42 / 898)            |
| BCS                        | 5.27 (120 / 2279)           | 6.98 (108 / 1547)            | 4.77 (50 / 1048)            | 4.02 (32 / 796)            |
| Rate ratio, from (O-E) / V | 0.84 SE 0.13<br>-8.4 / 49.4 | 0.65 SE 0.13<br>-18.0 / 41.7 | 0.74 SE 0.19<br>-6.5 / 21.7 | 1.06 SE 0.26<br>0.9 / 16.2 |



**Webfigure 1d. Effect of radiotherapy (RT) after breast-conserving surgery (BCS) on 10-year risk of any (locoregional or distant) first recurrence and on 15-year risks of breast cancer mortality and all-cause mortality. Data from 2464 women with pathological nodal status unknown. Vertical lines indicate 1 SE above or below the 5, 10 and 15 year percentages.**

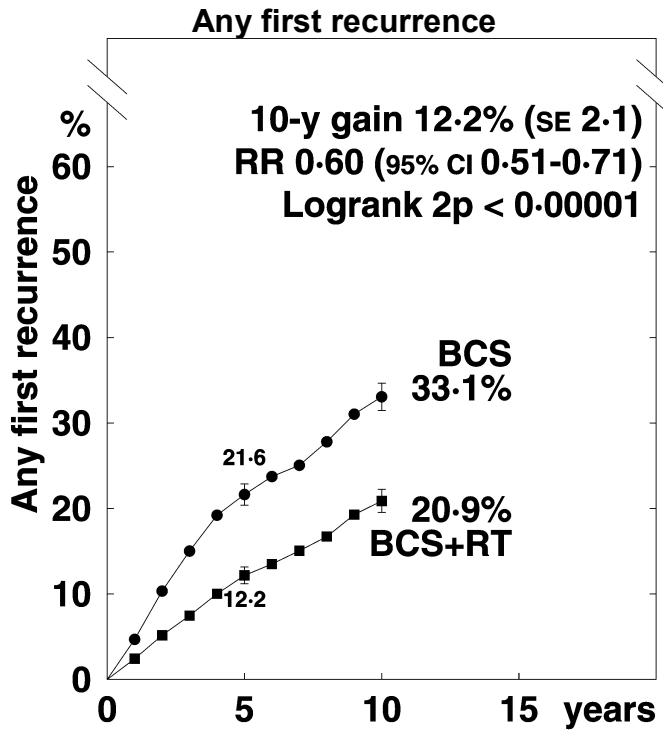

any first recurrence rates (% / year) and logrank analyses

|                            | Years 0 - 4                  | Years 5 - 9                  | Year 10+                   |
|----------------------------|------------------------------|------------------------------|----------------------------|
| BCS+RT                     | 2.67 (147 / 5496)            | 2.09 (75 / 3593)             | 1.45 (32 / 2210)           |
| BCS                        | 4.95 (248 / 5010)            | 3.07 (90 / 2936)             | 1.26 (21 / 1668)           |
| Rate ratio, from (O-E) / V | 0.53 SE 0.08<br>-57.3 / 90.6 | 0.66 SE 0.13<br>-16.1 / 39.1 | 1.13 SE 0.30<br>1.5 / 12.6 |

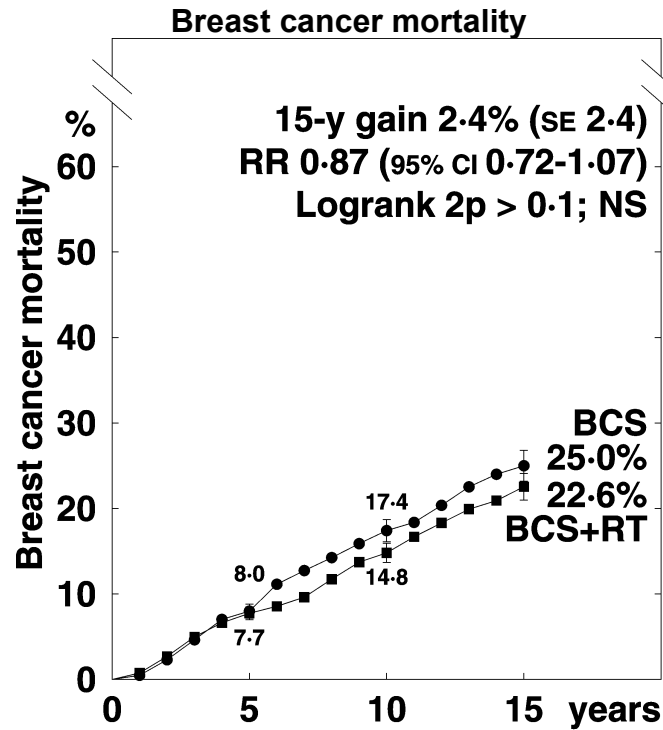

After-recurrence or possible-breast-cancer death rates (% / year) and logrank analyses

|                            | Years 0 - 4                 | Years 5 - 9                  | Years 10 - 14              | Year 15+                  |
|----------------------------|-----------------------------|------------------------------|----------------------------|---------------------------|
| BCS+RT                     | 1.53 SE 0.16                | 1.47 SE 0.19                 | 1.75 SE 0.30               | 1.59 SE 0.53              |
| BCS                        | 1.74 SE 0.18                | 2.34 SE 0.25                 | 2.13 SE 0.36               | 1.94 SE 0.61              |
| Rate ratio, from (O-E) / V | 0.98 SE 0.15<br>-0.9 / 42.0 | 0.69 SE 0.15<br>-12.4 / 33.0 | 1.00 SE 0.25<br>0.0 / 16.4 | 1.11 SE 0.49<br>0.5 / 4.6 |

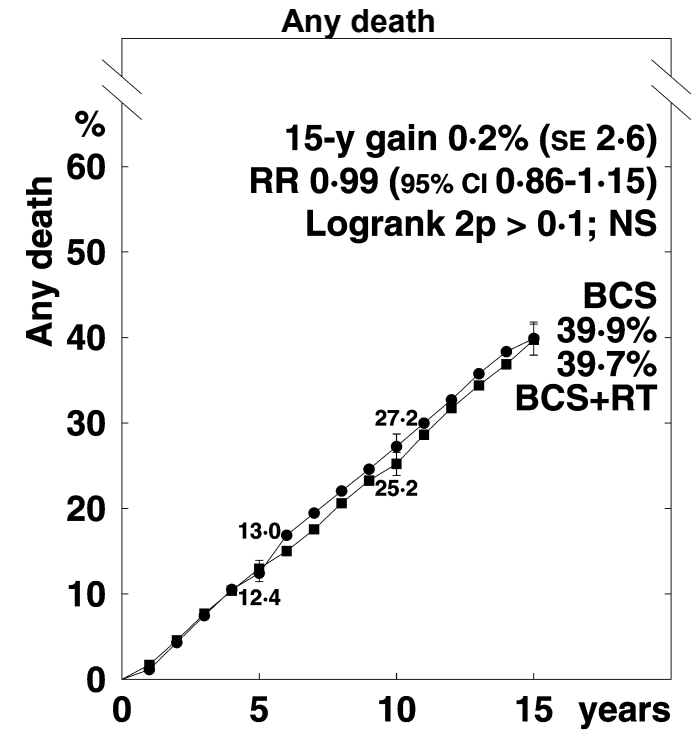

Death rates (% / year) and logrank analyses

|                            | Years 0 - 4                | Years 5 - 9                  | Years 10 - 14              | Year 15+                   |
|----------------------------|----------------------------|------------------------------|----------------------------|----------------------------|
| BCS+RT                     | 2.69 (153 / 5694)          | 3.00 (118 / 3937)            | 4.23 (82 / 1938)           | 5.12 (29 / 566)            |
| BCS                        | 2.72 (150 / 5514)          | 3.83 (139 / 3628)            | 3.97 (67 / 1689)           | 3.68 (19 / 516)            |
| Rate ratio, from (O-E) / V | 1.05 SE 0.12<br>3.4 / 71.2 | 0.79 SE 0.11<br>-14.0 / 60.3 | 1.12 SE 0.18<br>3.8 / 35.2 | 1.62 SE 0.38<br>5.5 / 11.4 |

**Webfigure 2a. 10-year risk of any first recurrence in trials of radiotherapy (RT) after breast-conserving surgery (BCS) by type of first recurrence and allocated treatment in 10,801 women.** Women found to have both a locoregional and a distant recurrence at the time of their first recurrence are classified as having a distant recurrence. The contribution for a specific year is the estimated probability of not having either a locoregional or a distant recurrence in any previous year multiplied by the estimated probability of having a locoregional recurrence before any distant recurrence in that year. Note that although radiotherapy somewhat delays or prevents distant recurrence, as evidenced by the reduction in breast cancer mortality it produces, it greatly delays or prevents local recurrence thereby allowing some distant recurrences to be seen as first events that would otherwise have been preceded by a local recurrence.

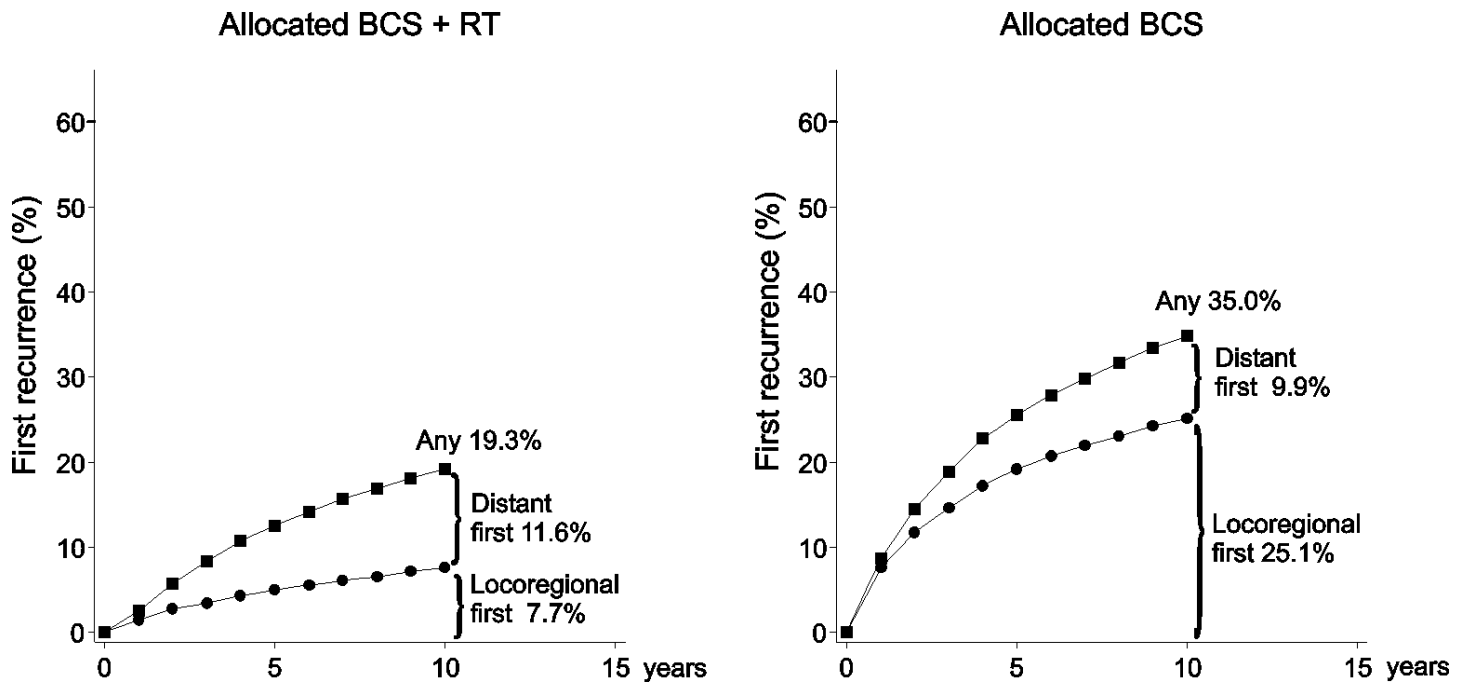

Numbers of women with first recurrence by 10 years according to type of first recurrence and allocated treatment (BCS+RT /BCS):

| a. Ipsilateral breast | b. Ipsilateral axilla | c. Other locoregional site | d. Locoregional, site unknown | Any locoregional (ie a+b+c+d) | Distant | Any recurrence |
|-----------------------|-----------------------|----------------------------|-------------------------------|-------------------------------|---------|----------------|
| 235/713               | 6/16                  | 49/60                      | 123/389                       | 413/1178                      | 557/434 | 970/1612       |

**Webfigure 2b. 10-year risk of any first recurrence in trials of radiotherapy (RT) after breast-conserving surgery (BCS) by pathological nodal status, type of first recurrence and allocated treatment.** Women found to have both a locoregional and a distant recurrence at the time of their first recurrence are classified as having a distant recurrence. This figure does not provide evidence that radiotherapy increases the risk of distant recurrence, see legend on webappendix p9.

**7287 pN0 women**

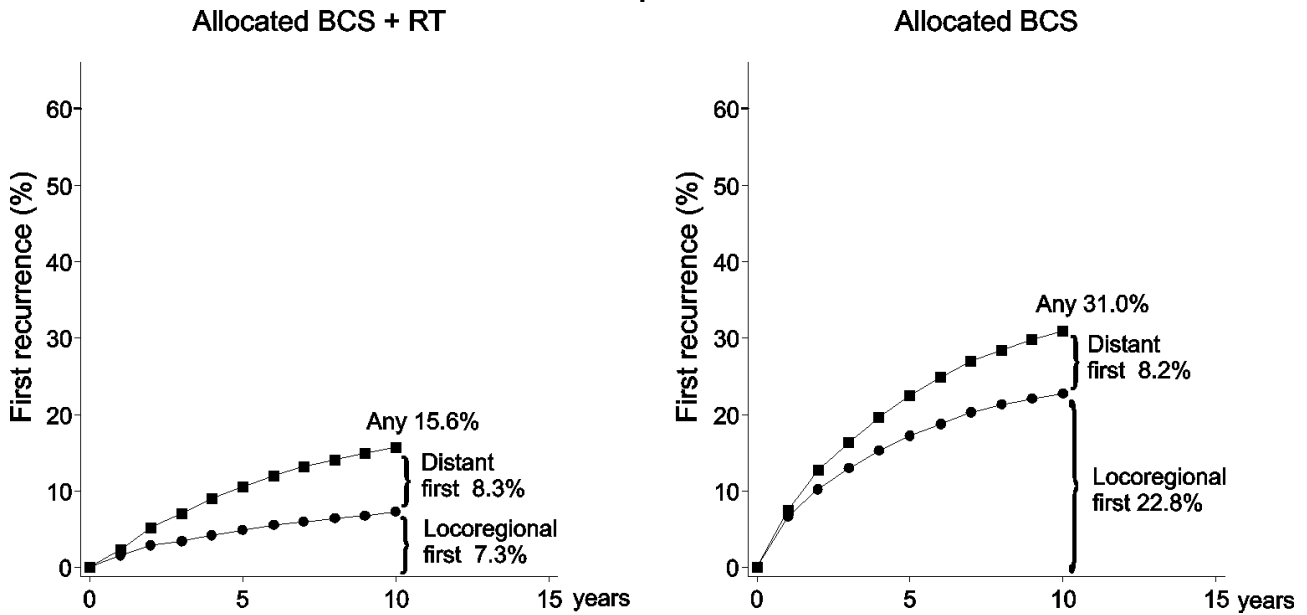

Numbers of women with first recurrence by 10 years according to type of first recurrence and allocated treatment (BCS+RT / BCS):

| a. Ipsilateral breast | b. Ipsilateral axilla | c. Other locoregional site | d. Locoregional, site unknown | Any locoregional (ie a+b+c+d) | Distant | Any recurrence |
|-----------------------|-----------------------|----------------------------|-------------------------------|-------------------------------|---------|----------------|
| 164/451               | 6/15                  | 23/25                      | 64/229                        | 257/720                       | 274/248 | 531/968        |

**1050 pN+ women**

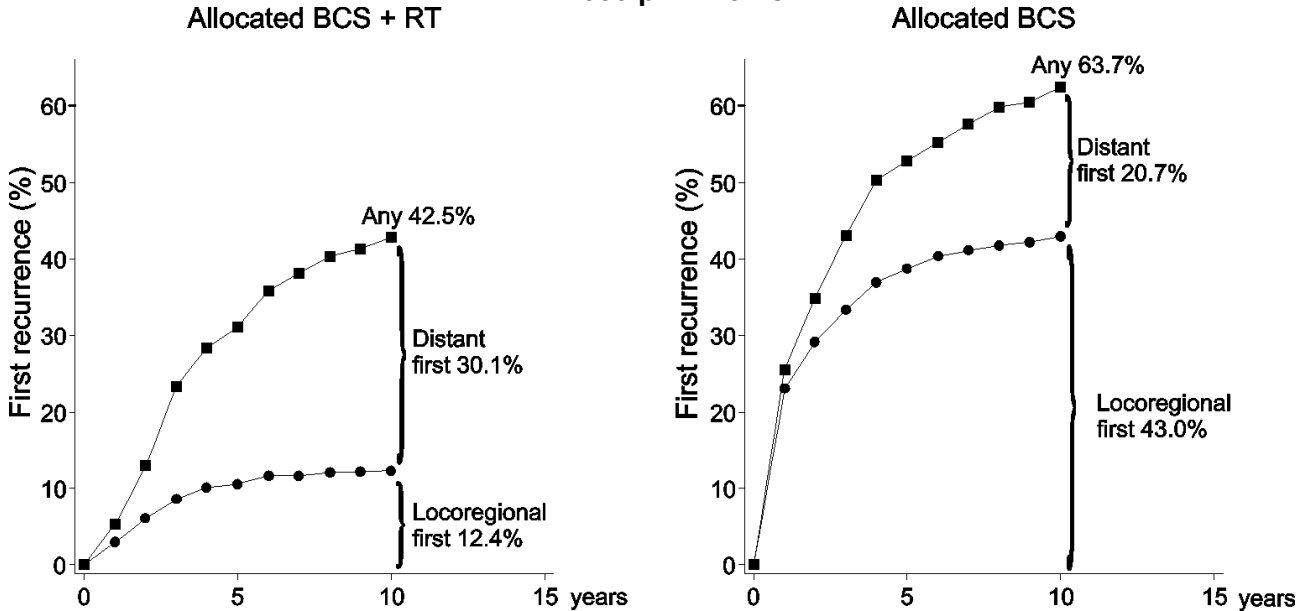

Numbers of women with first recurrence by 10 years according to type of first recurrence and allocated treatment (BCS+RT / BCS):

| a. Ipsilateral breast | b. Ipsilateral axilla | c. Other locoregional site | d. Locoregional, site unknown | Any locoregional (ie a+b+c+d) | Distant | Any recurrence |
|-----------------------|-----------------------|----------------------------|-------------------------------|-------------------------------|---------|----------------|
| 18/110                | 0/0                   | 19/19                      | 33/81                         | 70/210                        | 147/96  | 217/306        |

**Webfigure 2c. 10-year risk of any first recurrence in trials of radiotherapy (RT) after breast-conserving surgery (BCS) by surgery, oestrogen receptor status and whether tamoxifen was given to both trial arms or not at all, type of first recurrence and allocated treatment.** Women found to have both a locoregional and a distant recurrence at the time of their first recurrence are classified as having a distant recurrence. This figure does not provide evidence that radiotherapy increases the risk of distant recurrence, see legend on webappendix p9.

**1656 pN0 women: Lumpectomy, ER+tam-**

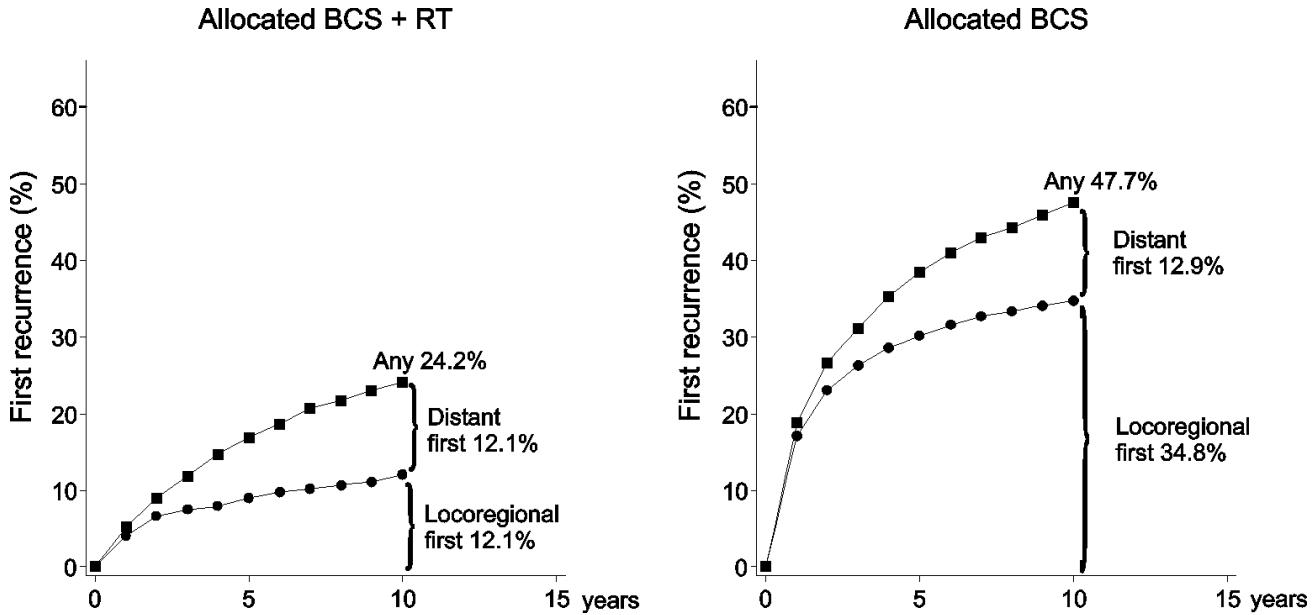

Numbers of women with first recurrence by 10 years according to type of first recurrence and allocated treatment (BCS+RT / BCS):

| a. Ipsilateral breast | b. Ipsilateral axilla | c. Other locoregional site | d. Locoregional, site unknown | Any locoregional (ie a+b+c+d) | Distant | Any recurrence |
|-----------------------|-----------------------|----------------------------|-------------------------------|-------------------------------|---------|----------------|
| 89/223                | 0/0                   | 12/15                      | 6/26                          | 107/264                       | 95/94   | 202/358        |

**575 pN0 women: Lumpectomy, ER-poor**

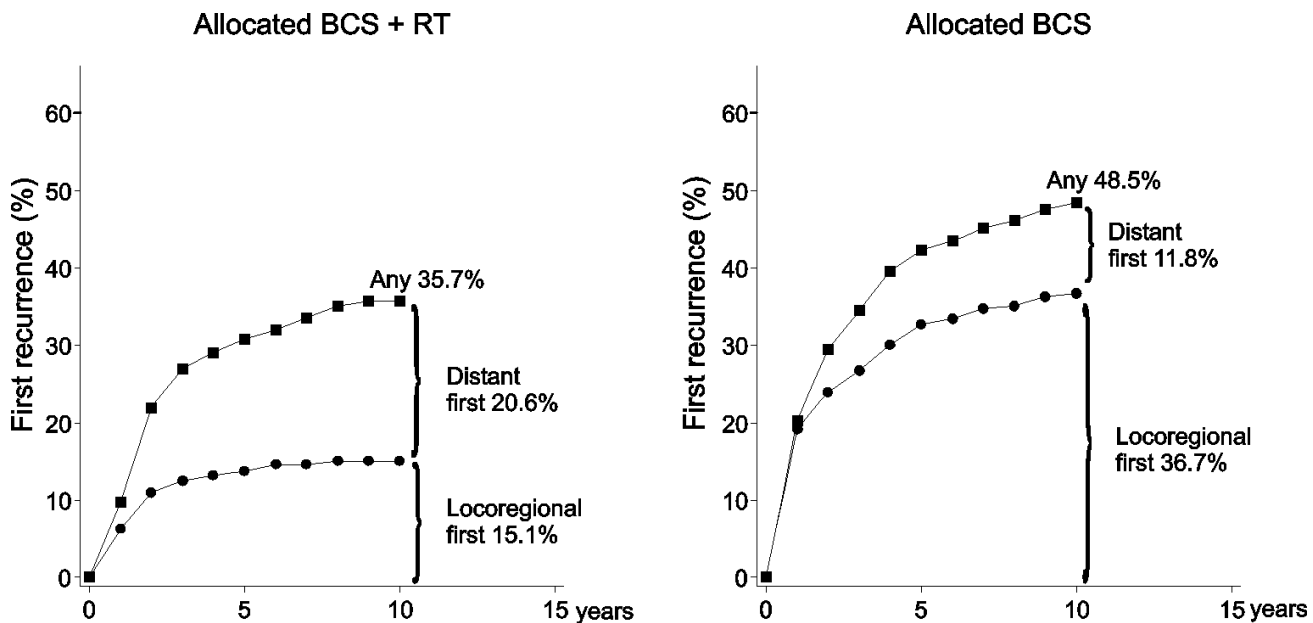

Numbers of women with first recurrence by 10 years according to type of first recurrence and allocated treatment (BCS+RT / BCS):

| a. Ipsilateral breast | b. Ipsilateral axilla | c. Other locoregional site | d. Locoregional, site unknown | Any locoregional (ie a+b+c+d) | Distant | Any recurrence |
|-----------------------|-----------------------|----------------------------|-------------------------------|-------------------------------|---------|----------------|
| 26/66                 | 0/0                   | 9/10                       | 9/23                          | 44/99                         | 56/36   | 100/135        |

**Webfigure 2d. 10-year risk of any first recurrence in trials of radiotherapy (RT) after breast-conserving surgery (BCS) by surgery, oestrogen receptor status and whether tamoxifen was given to both trial arms or not at all, type of first recurrence and allocated treatment.** Women found to have both a locoregional and a distant recurrence at the time of their first recurrence are classified as having a distant recurrence. This figure does not provide evidence that radiotherapy increases the risk of distant recurrence, see legend on webappendix p9.

**1956 pN0 women: >Lumpectomy, ER+tam- or ER-poor**

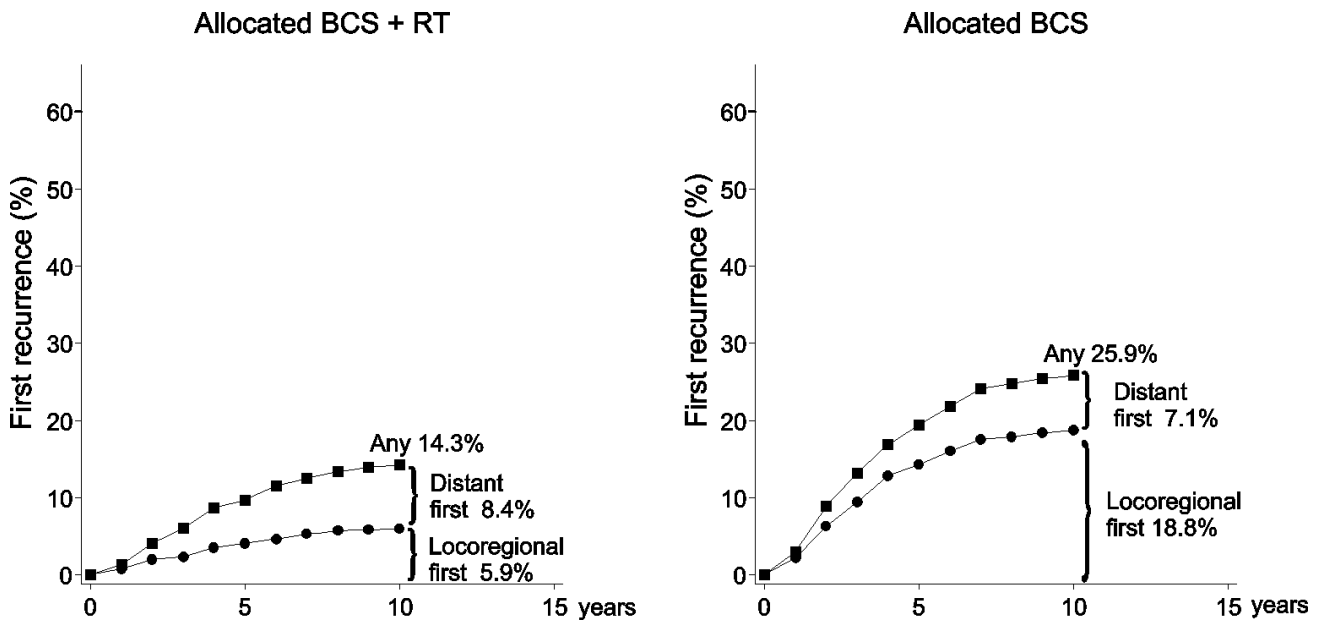

Numbers of women with first recurrence by 10 years according to type of first recurrence and allocated treatment (BCS+RT /BCS):

| a. Ipsilateral breast | b. Ipsilateral axilla | c. Other locoregional site | d. Locoregional, site unknown | Any locoregional (ie a+b+c+d) | Distant | Any recurrence |
|-----------------------|-----------------------|----------------------------|-------------------------------|-------------------------------|---------|----------------|
| 32/88                 | 6/14                  | 2/0                        | 18/73                         | 58/175                        | 79/65   | 137/240        |

**3100 pN0 women: Lumpectomy, ER+tam+**

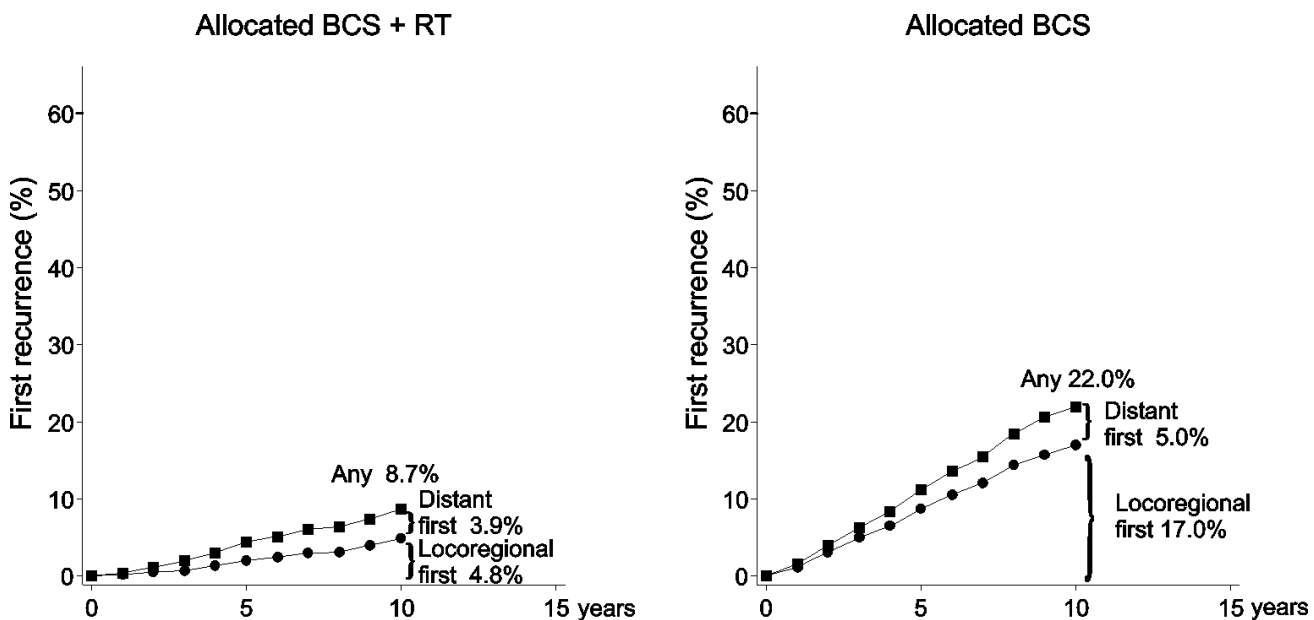

Numbers of women with first recurrence by 10 years according to type of first recurrence and allocated treatment (BCS+RT /BCS):

| a. Ipsilateral breast | b. Ipsilateral axilla | c. Other locoregional site | d. Locoregional, site unknown | Any locoregional (ie a+b+c+d) | Distant | Any recurrence |
|-----------------------|-----------------------|----------------------------|-------------------------------|-------------------------------|---------|----------------|
| 17/74                 | 0/1                   | 0/0                        | 31/107                        | 48/182                        | 44/53   | 92/235         |

**Webfigure 3. Proportional effect of radiotherapy (RT) after breast-conserving surgery (BCS) on time to first recurrence of any type (locoregional or distant) and on breast-cancer mortality in 10,801 women. Event rate ratios by period of follow-up.**

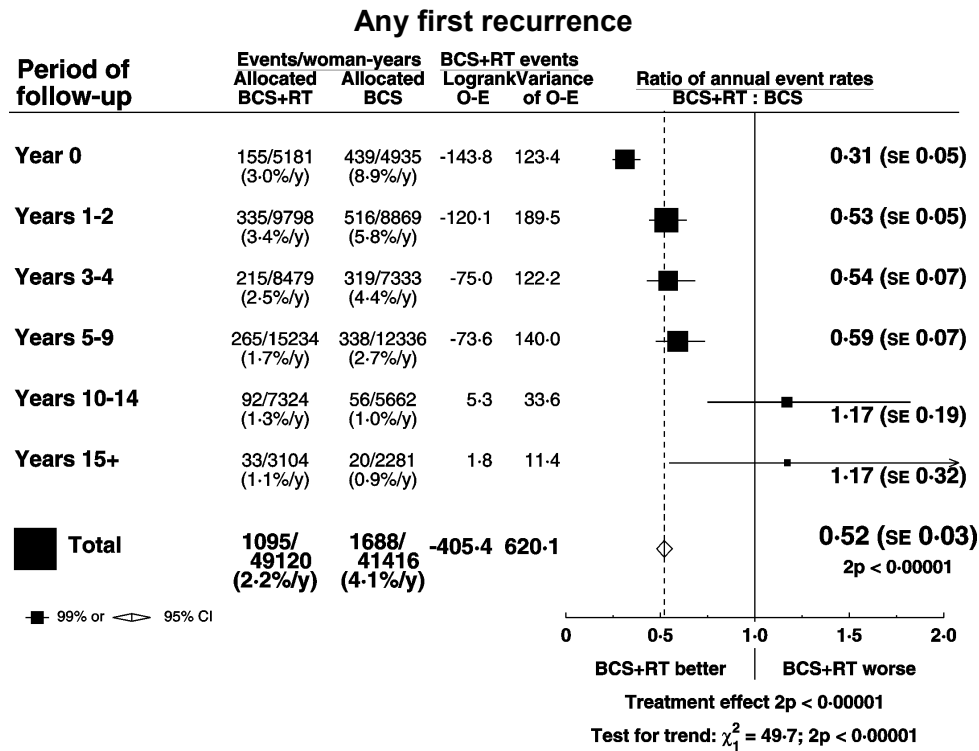

Numbers of women with first recurrence by type of first recurrence, period of follow-up and allocated treatment (BCS+RT/BCS):

| Period of follow-up (years) | a. Ipsilateral breast | b. Ipsilateral axilla | c. Other locoregional site | d. Locoregional, site unknown | Any locoregional (ie a+b+c+d) | Distant | Any recurrence |
|-----------------------------|-----------------------|-----------------------|----------------------------|-------------------------------|-------------------------------|---------|----------------|
| 0                           | 78/312                | 1/3                   | 5/14                       | 15/54                         | 99/383                        | 58/57   | 157/440        |
| 1-2                         | 59/181                | 2/5                   | 27/27                      | 34/143                        | 122/356                       | 212/159 | 334/515        |
| 3-4                         | 43/109                | 3/3                   | 7/10                       | 32/95                         | 85/217                        | 131/102 | 216/319        |
| 5-9                         | 55/111                | 0/5                   | 10/9                       | 42/97                         | 107/222                       | 156/116 | 263/338        |
| 10-14                       | 11/9                  | 0/1                   | 3/1                        | 3/1                           | 16/13                         | 62/32   | 92/56          |
| 15+                         | 1/0                   | 0/0                   | 0/0                        | 4/4                           | 5/4                           | 28/16   | 33/20          |
| Total                       | 247/722               | 6/17                  | 52/61                      | 143/406                       | 448/1206                      | 647/482 | 1095/1688      |

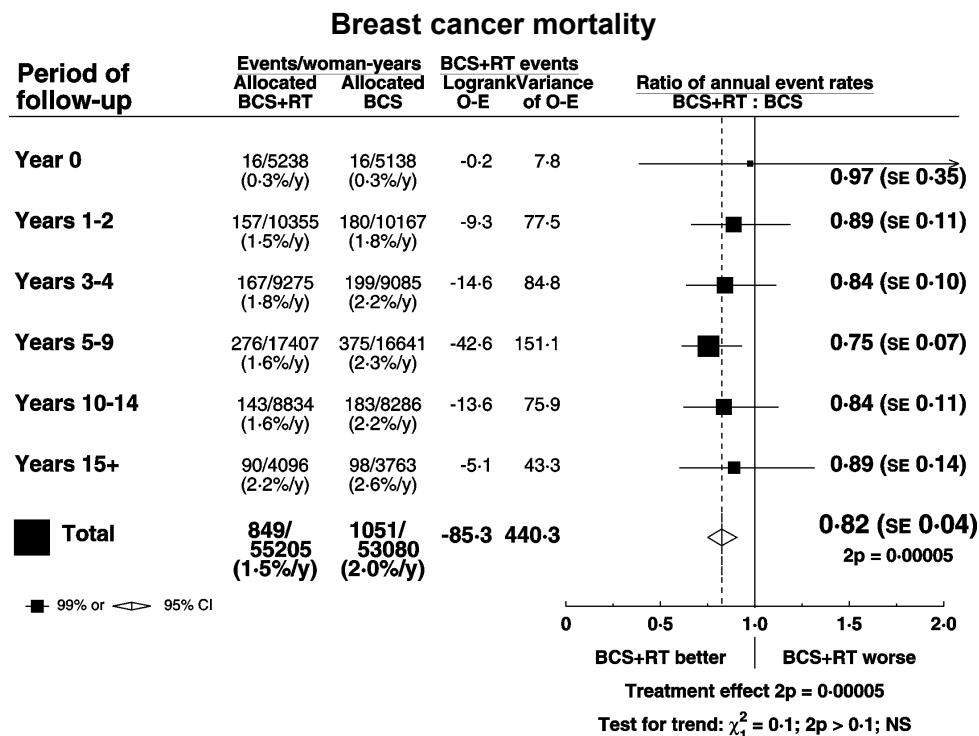

**Webfigure 4. Proportional effect of radiotherapy (RT) after breast-conserving surgery (BCS). Event rate ratios for any (locoregional or distant) first recurrence, during years 0-9, and for breast cancer mortality in women with pathologically node-negative disease by prognostic and other factors.**

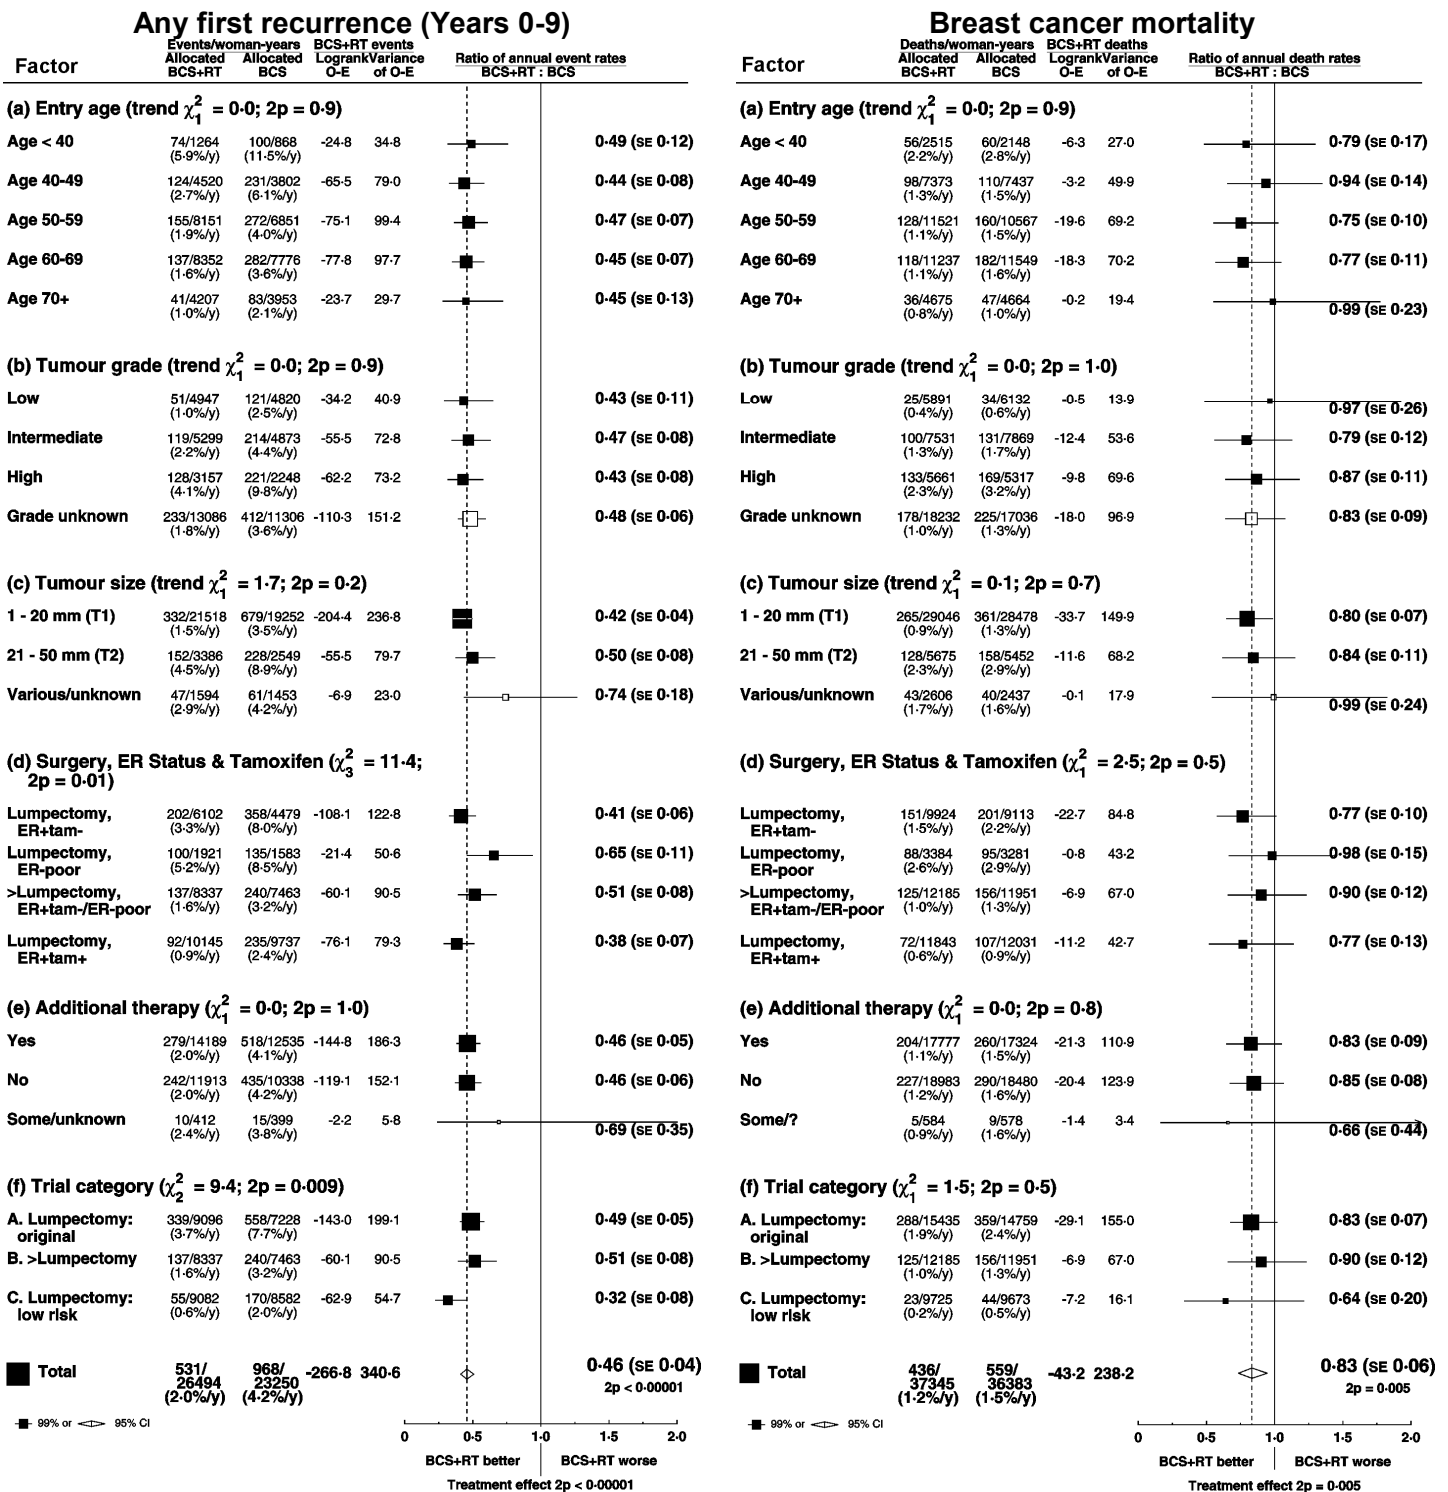

Categories including unknowns excluded from tests for trend and heterogeneity.

See Table 1 in main paper for definitions of trial categories. For years 0-4 only test of heterogeneity between different trial categories in women with pN0 disease has  $\chi^2 = 3.85$  on 2 df, p=0.15.

Webfigure 5a. Effect of radiotherapy (RT) after breast-conserving surgery (BCS) on any (locoregional or distant) first recurrence in pathologically node-negative women — 10-year risks by age at entry. Vertical lines indicate 1 SE above or below the 5 and 10 year percentages.

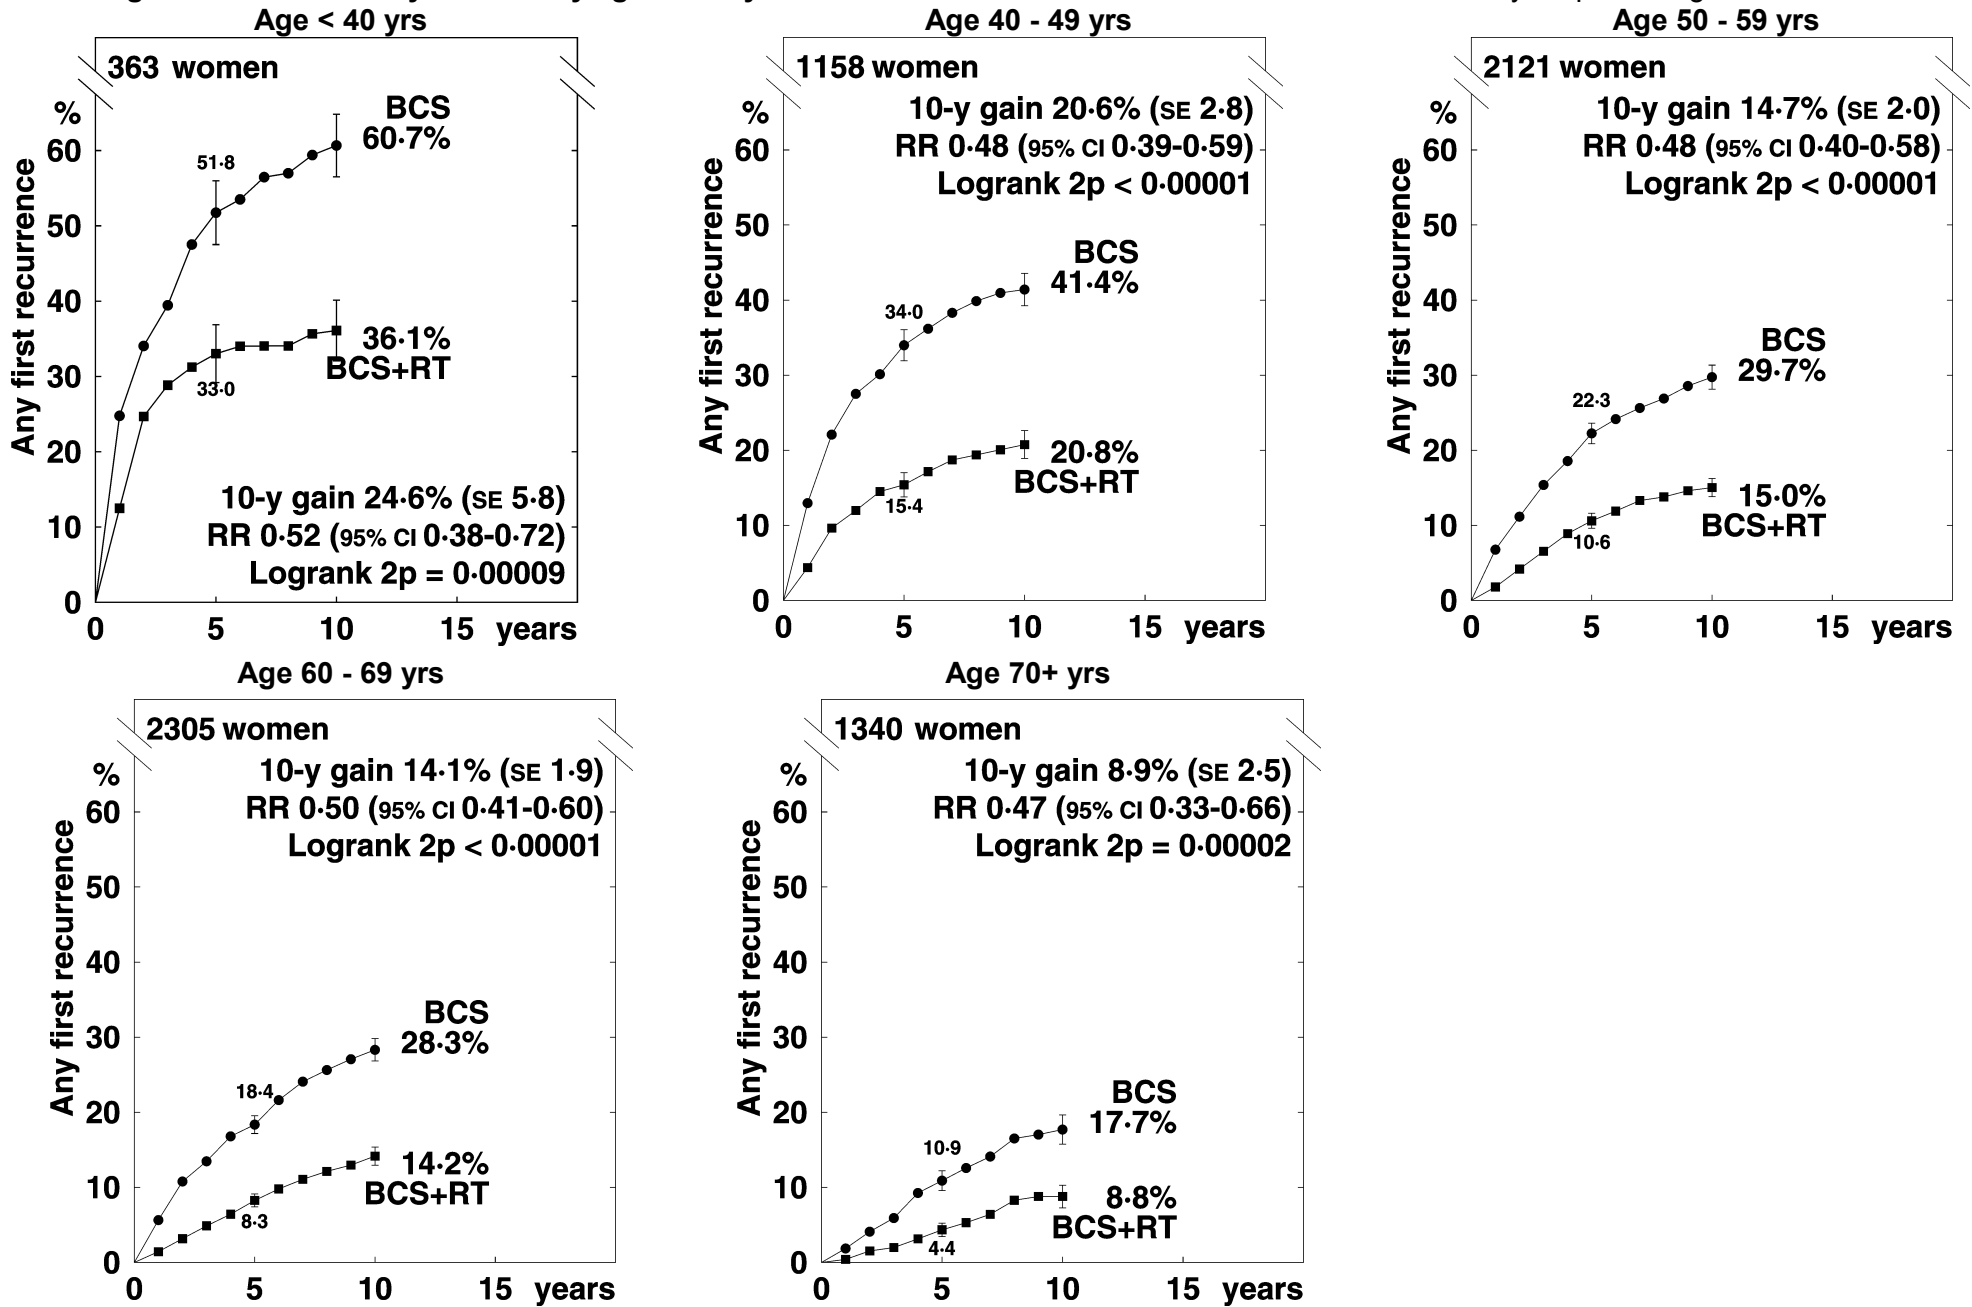



**Webfigure 5b. Effect of radiotherapy (RT) after breast-conserving surgery (BCS) on any (locoregional or distant) first recurrence in pathologically node-negative women — 10-year risks according to tumour grade.** Vertical lines indicate 1 SE above or below the 5 and 10 year percentages.

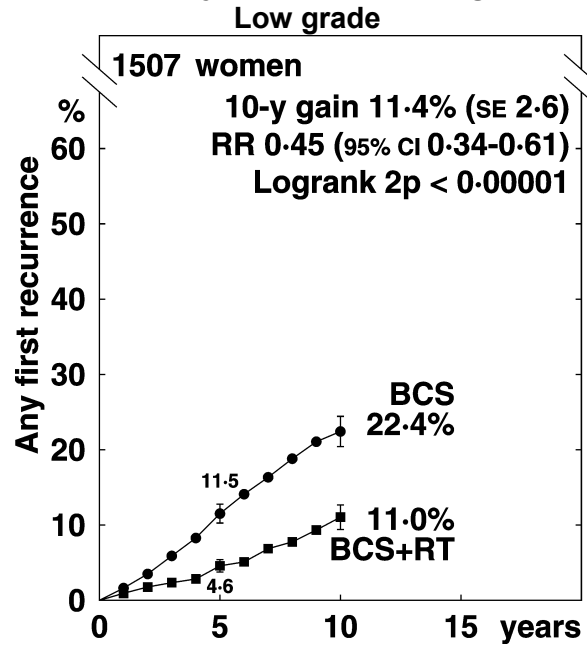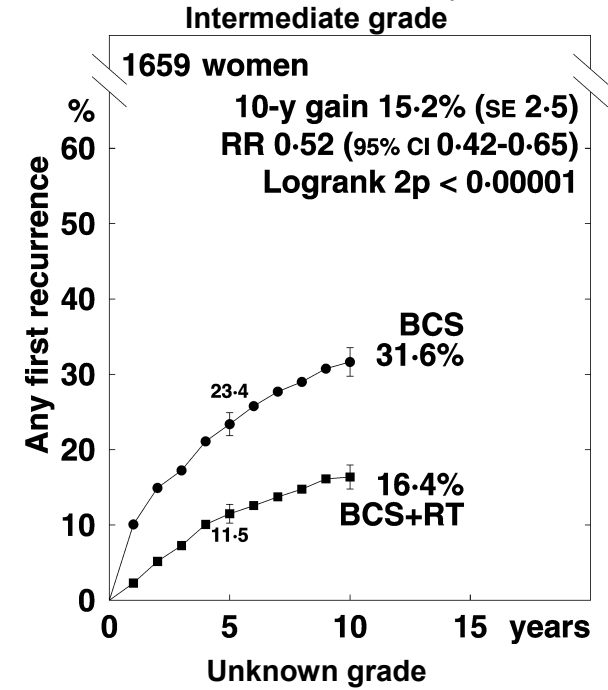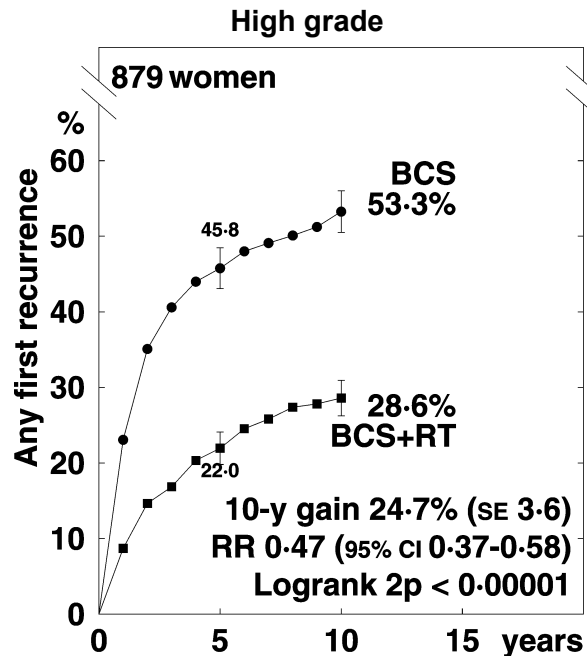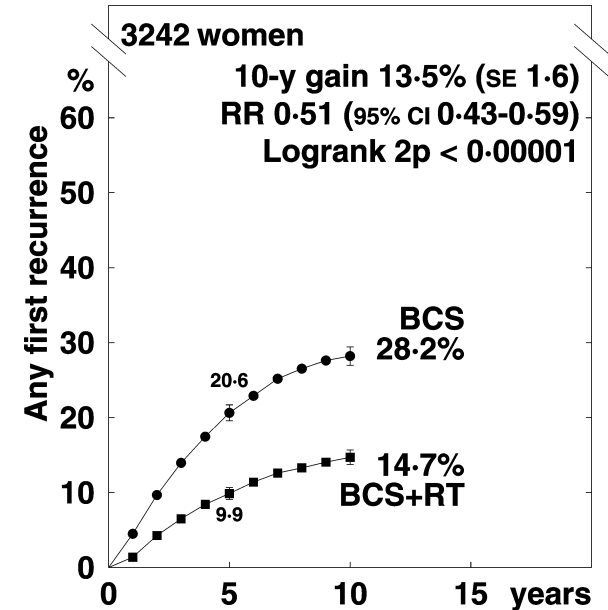

**Webfigure 5c. Effect of radiotherapy (RT) after breast-conserving surgery (BCS) on any (locoregional or distant) first recurrence in pathologically node-negative women — 10-year risks according to tumour size. Vertical lines indicate 1 SE above or below the 5 and 10 year percentages.**

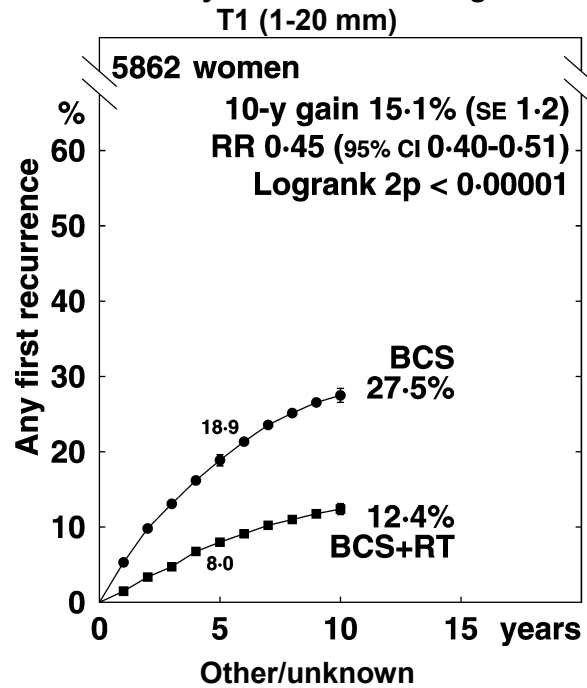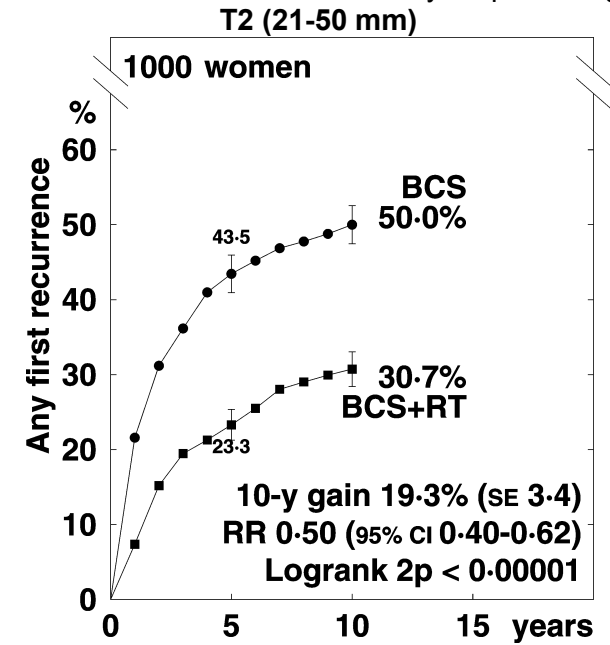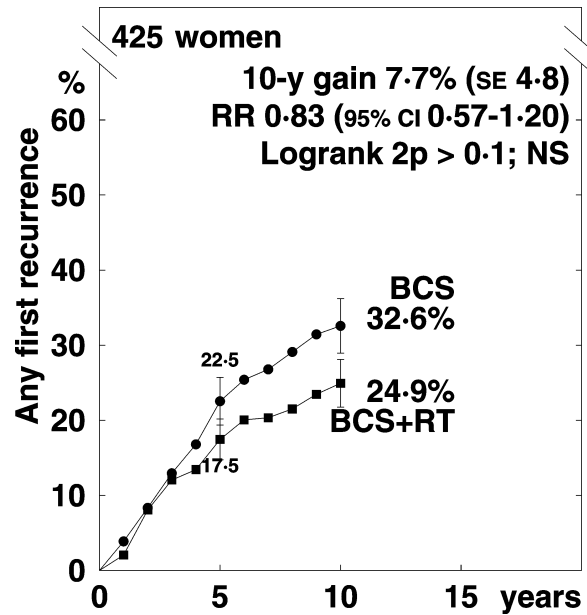

**Webfigure 5d. Effect of radiotherapy (RT) after breast-conserving surgery (BCS) on any (locoregional or distant) first recurrence in pathologically node-negative women — 10-year risks according to extent of surgery and ER-status & trial policy of tamoxifen use. Vertical lines indicate 1 SE above or below the 5 and 10 year percentages.**

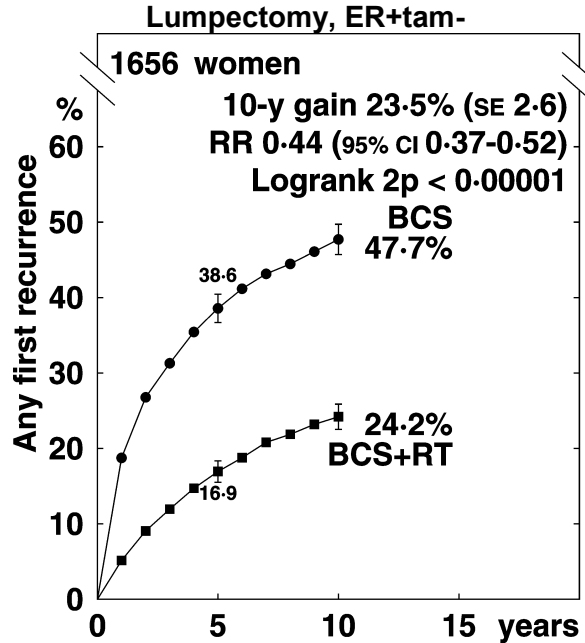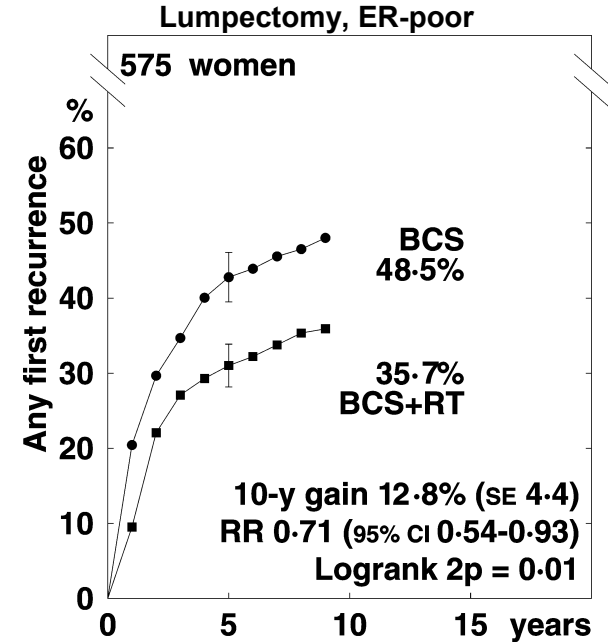

>Lumpectomy, ER+tam- or ER-poor

Lumpectomy, ER+tam+

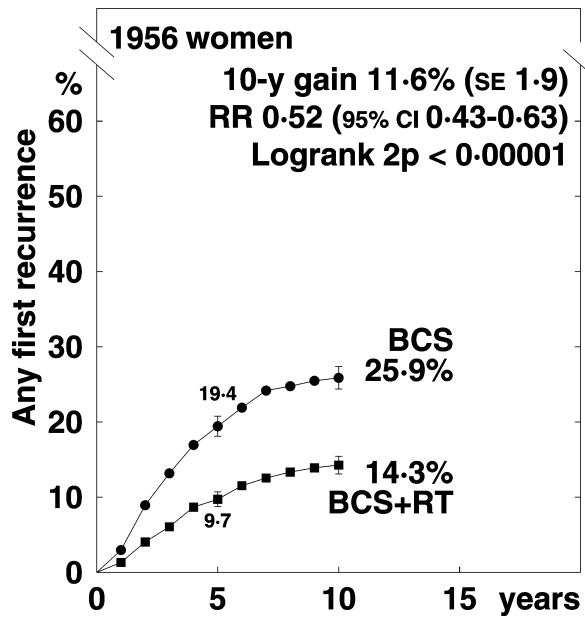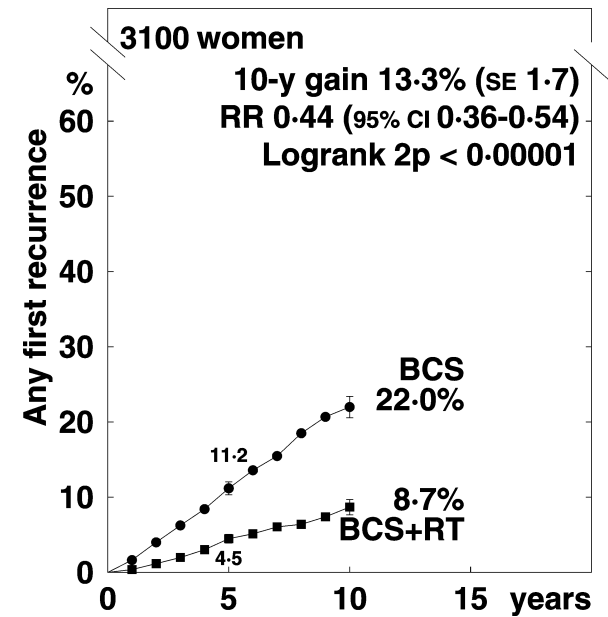

Webfigure 5e. Effect of radiotherapy (RT) after breast-conserving surgery (BCS) on any (locoregional or distant) first recurrence in pathologically node-negative women — 10-year risks according to trial category. Vertical lines indicate 1 SE above or below the 5 and 10 year percentages.

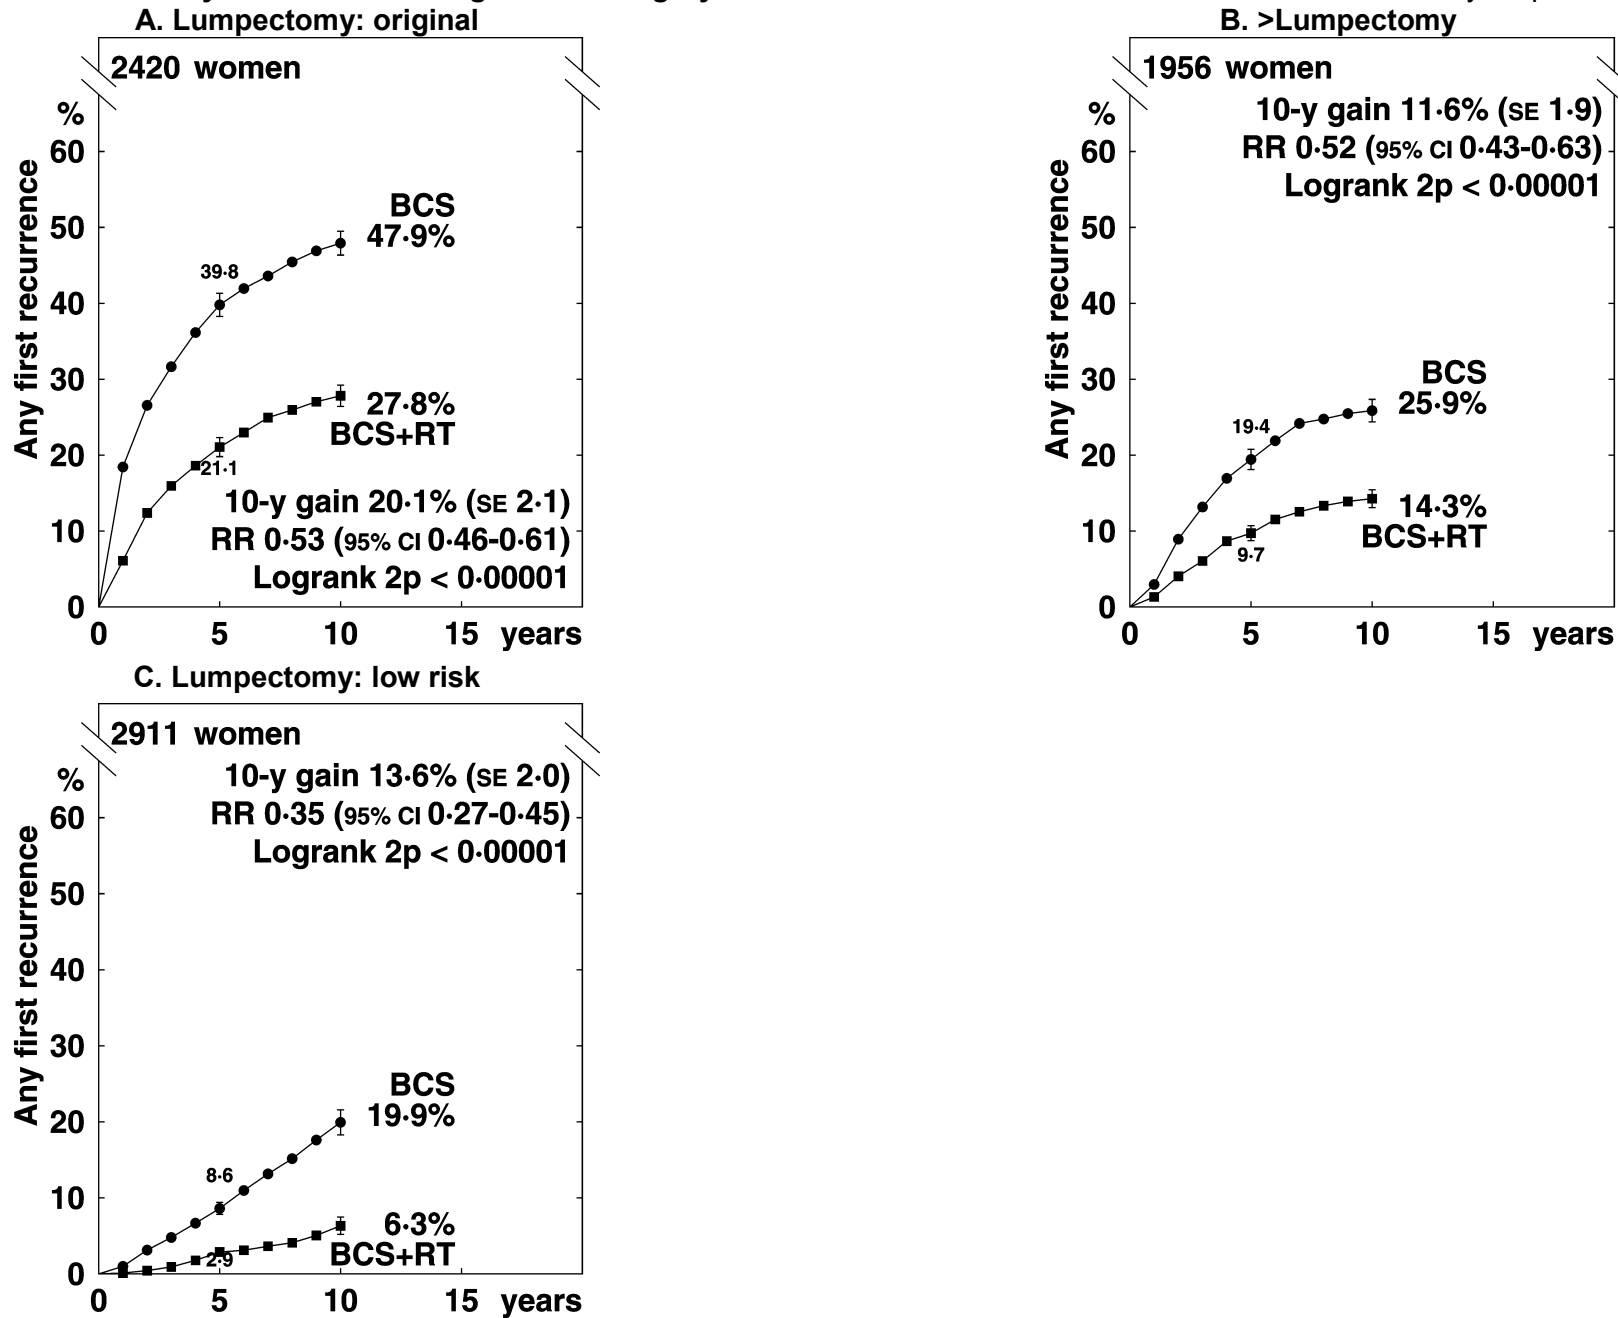

## Webfigure 6a. Statistical method for modelling the absolute risk of any (locoregional or distant) first recurrence in women allocated to radiotherapy (RT) and the reduction in absolute risk of any (locoregional or distant) first recurrence at 10 years.

### *Introduction*

The statistical methodology used in previous EBCTCG reports did not readily extend to estimating the dependence of the absolute risk of recurrence, or the absolute reduction in risk from radiotherapy, on several factors simultaneously. Therefore, estimates of these quantities (shown in table 2 and figure 4 of the main paper and in webappendix p21-29), are based on an alternative method. The first step in this method was to tabulate the numbers of events and woman-years at risk by all the following factors simultaneously: trial, treatment allocated (RT, No RT), age (<40, 40-, 50-, 60-, 70+ years), tumour grade (Low, Intermediate, High, Unknown), tumour size (T1 [1-20 mm], T2 [21-50 mm], other/unknown), ER-status & trial policy of tamoxifen use (ER+Tam+, ER+Tam-, ER-poor) and, for pN+ women, number of positive nodes (pN1-3, pN4+). Two different types of Poisson regression models, described in sections (ii) and (iii) below, were fitted to the tabulated data by the method of maximum likelihood using the computer program Epiwin v1.81. Inspection of the crude recurrence rates by year of follow-up suggested that the rates in the first few years were larger than those in subsequent years and so weights, (4,4,3,3,2,2,2,1,1,1 in pN0 women and 4,3,3,3,1,1,1,1,1,1 in pN+ women) were used in the models to take account of this variation. Significance tests were carried out using the likelihood ratio and were two-sided.

### *(ii) Identification of form of model for women allocated to RT*

To identify an appropriate form for a model characterising the recurrence rate in women allocated to breast-conserving surgery (BCS) + RT in the main modelling process in section (iii) below, initial model-fitting considered only women allocated to RT. In this initial stage, the Poisson mean took the form  $LL(0)=\exp(V_1+V_2+\dots+V_k)$ , where  $V_1, V_2$  etc are categorical terms representing the factors by which the data had been subdivided. This initial model-fitting suggested that the 10-year recurrence rate for women allocated to RT could be summarised by a model that included terms for : trial (30 categories — this is larger than the number of trials, as some trials were divided into 2 strata, eg where ER+women were given tamoxifen and ER- poor women given CMF), age (5 categories), tumour grade (4 categories), tumour size (3 categories), ER-status & trial policy of tamoxifen use (3 categories) and, for pN+ women, number of positive nodes (2 categories). Therefore, in the main modelling process all models included these terms in  $LL(0)$ .

### *(iii) Modelling the absolute reduction in 10-year recurrence rate from radiotherapy*

To identify and characterise the factors determining the absolute difference in recurrence rate between women allocated to BCS + RT and women allocated to BCS only, models were fitted to the data for both treatment groups with mean of form:  $LL(0) + LI(1).LL(1)$ , where  $LL(0)$  has the form suggested by the initial modelling process (but during this second stage of the modelling process, the parameter values for the terms in  $LL(0)$  were re-estimated),  $LI(1)$  is a binary variable taking value 0 for irradiated women and 1 for unirradiated women (with coefficient constrained to be equal to 1), and  $LL(1)$  is a term with form  $LL(1)=\exp(W_1+W_2+\dots+W_k)$ , where  $W_1, W_2$  etc are categorical terms representing the factors being considered as determinants of the absolute reduction in the recurrence rate. The factors considered were selected from the factors by which the data had already been subdivided. Two further factors [trial policy of additional therapy (yes/no/some), and trial category (A: B: and C, as defined in table 1 of the main paper)], which vary between trials but not within a trial were also considered, as well as pairwise interactions between all the factors. The results of this selection process are presented in table 2 of the main paper and in webappendix p26. In the final model for node-negative women, presented in figure 4 of the main paper and in the webappendix p27,  $LL(1)$  retained the terms that were statistically significant in table 2 when each factor had been adjusted for all others. Tumour size was also included, as it was independently prognostic of the absolute risk in irradiated women [ie, in  $LL(0)$ ] and, when only the first 5 years after entry were considered of the absolute reduction in the recurrence rate. There were no significant two-way interactions between the factor representing these 4 rows and age, grade or tumour size. Therefore, the effects of grade, tumour size and age were assumed to be identical regardless of extent of surgery, and ER-status, & trial policy of tamoxifen use. For women aged <40, 40-49, 50-59, 60-69 and 70+ at entry, the logarithm of the estimated rate ratios was approximately linear across age-groups and so a log-linear trend was assumed. After concluding the modelling process, the coefficients of the parameters in  $LL(0)$  in the main modelling process were compared with those obtained during the initial model-fitting in which only data for women allocated to radiotherapy were considered, and were found to have changed by only a small amount. The parameter estimates, standard errors, and the correlation matrices for the final model are given in the webappendix p21-24.

### *(iv) Estimation of cumulative risk and absolute gain with radiotherapy*

Estimates of the recurrence rate indicated by the terms in  $LL(0)$  in the final fitted models were used to calculate the cumulative 10-year risks of any (ie locoregional or distant) first recurrence in women allocated to BCS+RT, while estimates of the recurrence rate indicated by the terms in  $LL(0)+LI(1).LL(1)$  were used to calculate the cumulative 10-year risks of any (ie locoregional or distant) first recurrence in women allocated to BCS only. Estimates are presented with the factor representing trial set to median values when grouped by extent of surgery. The non-linear relationship between the recurrence rate and cumulative risk, which is non-linear, is illustrated in webappendix p25. Estimates of the reduction in absolute recurrence risk at 10 years were then taken to be the difference between these two estimates. Estimates of the reduction in absolute recurrence risk at 5 years were derived from the same models (see webappendix p31-34). Analyses of residuals and other statistical procedures confirmed that the estimates presented fitted the data well. Despite this, confidence intervals have not been presented for the estimates of absolute risk, as such estimates are subject to many sources of uncertainty over and above those that can be included in formal statistical confidence intervals. Displaying them might, therefore, give the impression that the estimates presented are more precise than is, in fact, the case.

**Webfigure 6b. Model, using the method described in webappendix p20, for the dependence on prognostic and other factors of the absolute 10-year rate of any (locoregional or distant) first recurrence rate in women with pN0 disease allocated to radiotherapy.**

Absolute 10-year local recurrence rate per 100 years at risk=

$$\exp(d_1 \cdot \beta_1 + d_2 \cdot \beta_2 + d_3 \cdot \beta_3 + d_4 \cdot \beta_4 + d_5 \cdot \beta_5 + d_6 \cdot \beta_6 + d_7 \cdot \beta_7 + d_8 \cdot \beta_8 + d_9 \cdot \beta_9 + d_{10} \cdot \beta_{10} + d_{11} \cdot \beta_{11} + d_{12} \cdot \beta_{12} + d_{13} \cdot \beta_{13} + d_{14} \cdot \beta_{14})$$

where

|                  |   |                     |   |           |                   |   |                      |   |           |
|------------------|---|---------------------|---|-----------|-------------------|---|----------------------|---|-----------|
| d <sub>1</sub> = | 1 | Age <40             | 0 | Otherwise | d <sub>8</sub> =  | 1 | Unknown grade,       | 0 | Otherwise |
| d <sub>2</sub> = | 1 | Age 40-49           | 0 | Otherwise | d <sub>9</sub> =  | 1 | T2 (21-50 mm),       | 0 | Otherwise |
| d <sub>3</sub> = | 1 | Age 50-59           | 0 | Otherwise | d <sub>10</sub> = | 1 | Tumour size unknown, | 0 | Otherwise |
| d <sub>4</sub> = | 1 | Age 60-69           | 0 | Otherwise | d <sub>11</sub> = | 1 | ER+Tam-,             | 0 | Otherwise |
| d <sub>5</sub> = | 1 | Age 70+             | 0 | Otherwise | d <sub>12</sub> = | 1 | ER+Tam+,             | 0 | Otherwise |
| d <sub>6</sub> = | 1 | Intermediate grade, | 0 | Otherwise | d <sub>13</sub> = | 1 | Lumpectomy*          | 0 | Otherwise |
| d <sub>7</sub> = | 1 | High grade,         | 0 | Otherwise | d <sub>14</sub> = | 1 | >Lumpectomy*         | 0 | Otherwise |

\* Note: The fitted model included a term for each trial stratum, this shorthand notation represents the median values of these estimated coefficients, one for those trials in which the surgery performed was lumpectomy and the other for those where the surgery was >lumpectomy.

|     |             |       |           |                |       |           |
|-----|-------------|-------|-----------|----------------|-------|-----------|
| and | $\beta_1 =$ | 0.13  | (se 0.53) | $\beta_8 =$    | 0.06  | (se 0.16) |
|     | $\beta_2 =$ | -0.40 | (se 0.52) | $\beta_9 =$    | 0.49  | (se 0.10) |
|     | $\beta_3 =$ | -0.65 | (se 0.53) | $\beta_{10} =$ | 0.16  | (se 0.25) |
|     | $\beta_4 =$ | -0.68 | (se 0.54) | $\beta_{11} =$ | -0.25 | (se 0.10) |
|     | $\beta_5 =$ | -0.77 | (se 0.55) | $\beta_{12} =$ | -1.52 | (se 0.38) |
|     | $\beta_6 =$ | 0.43  | (se 0.15) | $\beta_{13} =$ | -0.78 | -         |
|     | $\beta_7 =$ | 0.37  | (se 0.16) | $\beta_{14} =$ | -1.53 | -         |

**Webfigure 6c. Correlation matrix for estimates of parameters in model for dependence on prognostic and other factors of the absolute 10-year rate of any (locoregional or distant) first recurrence rate in women with pN0 disease allocated to radiotherapy.**

|              | $\beta_1$ | $\beta_2$ | $\beta_3$ | $\beta_4$ | $\beta_5$ | $\beta_6$ | $\beta_7$ | $\beta_8$ | $\beta_9$ | $\beta_{10}$ | $\beta_{11}$ | $\beta_{12}$ | $\beta_{13}$ | $\beta_{14}$ |
|--------------|-----------|-----------|-----------|-----------|-----------|-----------|-----------|-----------|-----------|--------------|--------------|--------------|--------------|--------------|
| $\beta_1$    | 1.00      |           |           |           |           |           |           |           |           |              |              |              |              |              |
| $\beta_2$    | 0.76      | 1.00      |           |           |           |           |           |           |           |              |              |              |              |              |
| $\beta_3$    | 0.76      | 0.81      | 1.00      |           |           |           |           |           |           |              |              |              |              |              |
| $\beta_4$    | 0.74      | 0.80      | 0.83      | 1.00      |           |           |           |           |           |              |              |              |              |              |
| $\beta_5$    | 0.59      | 0.65      | 0.69      | 0.71      | 1.00      |           |           |           |           |              |              |              |              |              |
| $\beta_6$    | -0.61     | -0.63     | -0.64     | -0.64     | -0.53     | 1.00      |           |           |           |              |              |              |              |              |
| $\beta_7$    | -0.71     | -0.71     | -0.69     | -0.68     | -0.56     | 0.69      | 1.00      |           |           |              |              |              |              |              |
| $\beta_8$    | -0.66     | -0.71     | -0.71     | -0.71     | -0.58     | 0.74      | 0.75      | 1.00      |           |              |              |              |              |              |
| $\beta_9$    | -0.13     | -0.16     | -0.15     | -0.14     | -0.11     | -0.09     | -0.12     | -0.04     | 1.00      |              |              |              |              |              |
| $\beta_{10}$ | -0.16     | -0.13     | -0.09     | -0.07     | -0.02     | -0.01     | 0.01      | -0.15     | 0.16      | 1.00         |              |              |              |              |
| $\beta_{11}$ | -0.41     | -0.45     | -0.50     | -0.51     | -0.42     | 0.04      | 0.14      | 0.05      | 0.07      | 0.17         | 1.00         |              |              |              |
| $\beta_{12}$ | -0.33     | -0.38     | -0.44     | -0.46     | -0.46     | 0.04      | 0.19      | 0.16      | 0.13      | -0.06        | 0.51         | 1.00         |              |              |
| $\beta_{13}$ | -         | -         | -         | -         | -         | -         | -         | -         | -         | -            | -            | -            | 1.00         |              |
| $\beta_{14}$ | -         | -         | -         | -         | -         | -         | -         | -         | -         | -            | -            | -            | -            | 1.00         |

**Webfigure 6d. Model for the dependence of the absolute reduction in 10-year rate of any (locoregional or distant) first recurrence rate in women with pN0 disease on prognostic and other factors derived using the method described in webappendix p20.**

$$\text{Absolute reduction in 10-year local recurrence rate per 100 years at risk} = \exp(d_1 \cdot \beta_1 + d_2 \cdot \beta_2 + d_3 \cdot \beta_3 + d_4 \cdot \beta_4 + d_5 \cdot \beta_5 + d_6 \cdot \beta_6 + d_7 \cdot \beta_7 + d_8 \cdot \beta_8 + d_9 \cdot \beta_9 + a \cdot \beta_{10})$$

where

|         |   |                        |   |           |
|---------|---|------------------------|---|-----------|
| $d_1 =$ | 1 | Lump, ER+Tam-,         | 0 | otherwise |
| $d_2 =$ | 1 | Lump, ER-poor,         | 0 | otherwise |
| $d_3 =$ | 1 | Lump, ER+Tam+,         | 0 | otherwise |
| $d_4 =$ | 1 | >Lump, ER+Tam-/ERpoor, | 0 | otherwise |
| $d_5 =$ | 1 | Intermediate grade,    | 0 | otherwise |
| $d_6 =$ | 1 | High grade,            | 0 | otherwise |
| $d_7 =$ | 1 | Unknown grade,         | 0 | otherwise |
| $d_8 =$ | 1 | T2 (21-50 mm),         | 0 | otherwise |
| $d_9 =$ | 1 | Tumour size unknown,   | 0 | Otherwise |

$a = 1,2,3,4,5$  for ages <40, 40-49, 50-59, 60-69, & 70+

and

|                |       |           |
|----------------|-------|-----------|
| $\beta_1 =$    | -0.95 | (se 0.28) |
| $\beta_2 =$    | -2.09 | (se 0.44) |
| $\beta_3 =$    | -1.92 | (se 0.32) |
| $\beta_4 =$    | -1.94 | (se 0.33) |
| $\beta_5 =$    | 0.66  | (se 0.25) |
| $\beta_6 =$    | 1.52  | (se 0.24) |
| $\beta_7 =$    | 0.74  | (se 0.24) |
| $\beta_8 =$    | 0.42  | (se 0.17) |
| $\beta_9 =$    | -0.30 | (se 0.46) |
| $\beta_{10} =$ | -0.25 | (se 0.06) |



**Webfigure 6e. Correlation matrix for estimates of parameters in model for dependence of the absolute reduction in 10-year rate of any (locoregional or distant) first recurrence rate in women with pN0 disease on prognostic and other factors derived using the method described in webappendix p20.**

|              | $\beta_1$ | $\beta_2$ | $\beta_3$ | $\beta_4$ | $\beta_5$ | $\beta_6$ | $\beta_7$ | $\beta_8$ | $\beta_9$ | $\beta_{10}$ |
|--------------|-----------|-----------|-----------|-----------|-----------|-----------|-----------|-----------|-----------|--------------|
| $\beta_1$    | 1.00      |           |           |           |           |           |           |           |           |              |
| $\beta_2$    | 0.60      | 1.00      |           |           |           |           |           |           |           |              |
| $\beta_3$    | 0.84      | 0.54      | 1.00      |           |           |           |           |           |           |              |
| $\beta_4$    | 0.81      | 0.52      | 0.78      | 1.00      |           |           |           |           |           |              |
| $\beta_5$    | -0.51     | -0.35     | -0.51     | -0.47     | 1.00      |           |           |           |           |              |
| $\beta_6$    | -0.65     | -0.49     | -0.52     | -0.60     | 0.65      | 1.00      |           |           |           |              |
| $\beta_7$    | -0.57     | -0.39     | -0.49     | -0.66     | 0.66      | 0.74      | 1.00      |           |           |              |
| $\beta_8$    | -0.08     | -0.11     | 0.03      | 0.04      | -0.11     | -0.16     | -0.11     | 1.00      |           |              |
| $\beta_9$    | -0.06     | -0.09     | -0.12     | -0.01     | 0.00      | -0.03     | -0.10     | 0.07      | 1.00      |              |
| $\beta_{10}$ | -0.66     | -0.39     | -0.72     | -0.59     | -0.01     | 0.07      | -0.01     | -0.02     | 0.11      | 1.00         |

Webfigure 6f. Relationship between recurrence rate per 100 woman-years and 10-year cumulative risk of recurrence.

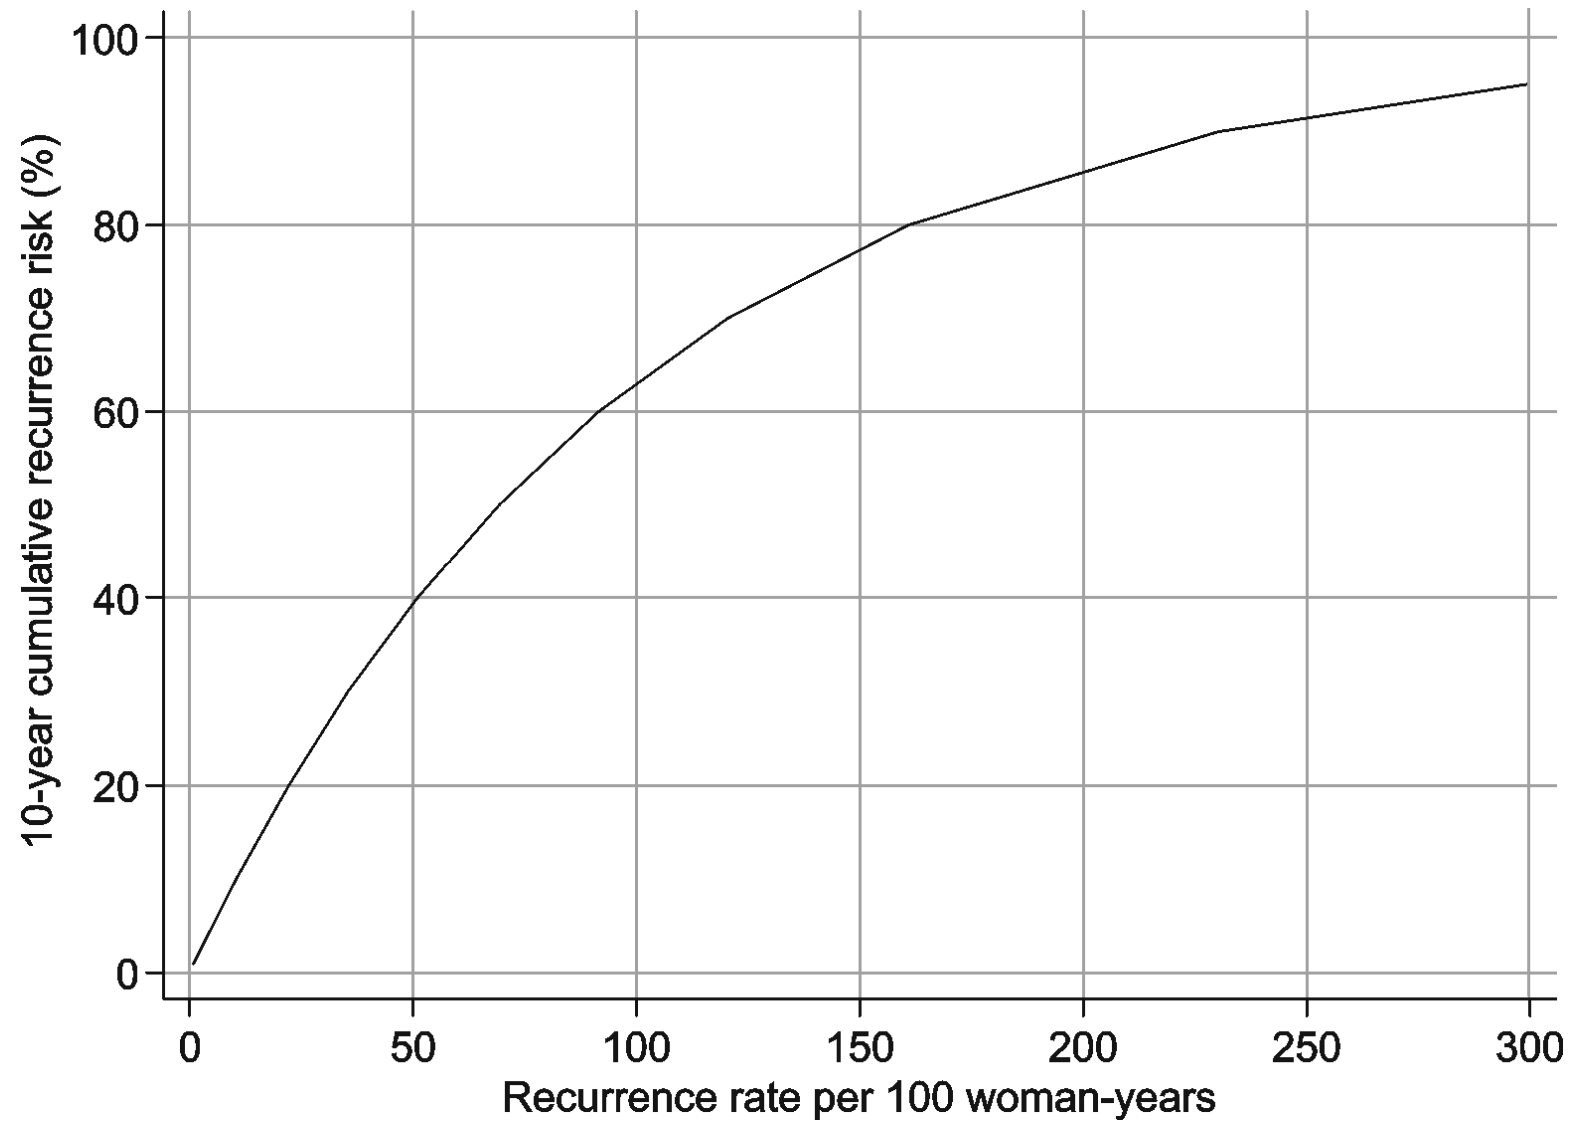

**Webtable 2. Effect of radiotherapy (RT) after breast-conserving surgery (BCS) on 10-year risk (%) of first recurrence of any type (locoregional or distant) in 7287 pathologically node-negative women according to prognostic and other factors.**

| Factor*                                                | Events/woman-year in years 0-9<br>(10-yr risk %) |      |               |      | Test for trend or heterogeneity‡                          |                                                             |
|--------------------------------------------------------|--------------------------------------------------|------|---------------|------|-----------------------------------------------------------|-------------------------------------------------------------|
|                                                        | Allocated BCS+RT                                 |      | Allocated BCS |      | Unadjusted§                                               | Adjusted¶                                                   |
| <b>Age at entry (years)</b>                            |                                                  |      |               |      |                                                           |                                                             |
| < 40                                                   | 74/1267                                          | 36.1 | 100/875       | 60.7 | X <sup>2</sup> <sub>1</sub> =34.1,<br>2p<0.001            | X <sup>2</sup> <sub>1</sub> =13.5,<br>2p <0.001             |
| 40 – 49                                                | 124/4528                                         | 20.8 | 231/3808      | 41.4 |                                                           |                                                             |
| 50 – 59                                                | 155/8157                                         | 15.0 | 272/6856      | 29.7 |                                                           |                                                             |
| 60 – 69                                                | 137/8360                                         | 14.2 | 281/7785      | 28.3 |                                                           |                                                             |
| 70+                                                    | 41/4202                                          | 8.8  | 83/3956       | 17.7 |                                                           |                                                             |
| <b>Tumour grade</b>                                    |                                                  |      |               |      |                                                           |                                                             |
| Low                                                    | 51/4959                                          | 11.0 | 120/4831      | 22.4 | X <sup>2</sup> <sub>1</sub> =43.3,<br>2p<0.001            | X <sup>2</sup> <sub>1</sub> =23.7,<br>2p <0.001             |
| Intermediate                                           | 119/5305                                         | 16.4 | 214/4879      | 31.6 |                                                           |                                                             |
| High                                                   | 128/3153                                         | 28.6 | 221/2254      | 53.3 |                                                           |                                                             |
| Unknown**                                              | 233/13098                                        | 14.7 | 412/11316     | 28.2 |                                                           |                                                             |
| <b>Tumour size</b>                                     |                                                  |      |               |      |                                                           |                                                             |
| T1 (1-20 mm)                                           | 332/21519                                        | 12.4 | 678/19260     | 27.5 | X <sup>2</sup> <sub>1</sub> =5.7,<br>2p=0.02              | X <sup>2</sup> <sub>1</sub> =3.7,<br>2p=0.06                |
| T2 (21-50 mm)                                          | 152/3392                                         | 30.7 | 228/2558      | 50.0 |                                                           |                                                             |
| Other/unknown**                                        | 47/1604                                          | 24.9 | 61/1462       | 32.6 |                                                           |                                                             |
| <b>ER status &amp; trial policy of tamoxifen use††</b> |                                                  |      |               |      |                                                           |                                                             |
| ER-poor                                                | 127/3223                                         | 28.9 | 183/2603      | 43.8 | 2p<0.001                                                  | 2p=0.003                                                    |
| ER+Tam-                                                | 312/13143                                        | 18.6 | 549/10936     | 36.0 |                                                           |                                                             |
| ER+Tam+                                                | 92/10149                                         | 8.7  | 235/9740      | 22.0 |                                                           |                                                             |
| <b>Trial policy of additional therapy**</b>            |                                                  |      |               |      |                                                           |                                                             |
| No                                                     | 242/11904                                        | 15.8 | 434/10338     | 31.6 | X <sup>2</sup> <sub>1</sub> =3.5,<br>2p=0.06              | X <sup>2</sup> <sub>1</sub> =0.6,<br>2p=0.45                |
| Yes                                                    | 279/14198                                        | 16.1 | 518/12542     | 31.8 |                                                           |                                                             |
| Some/Unknown**                                         | 10/413                                           | -    | 15/400        | -    |                                                           |                                                             |
| <b>Trial category§§</b>                                |                                                  |      |               |      |                                                           |                                                             |
| A. Lump: original                                      | 339/9101                                         | 27.8 | 558/7232      | 47.9 | A vs C:                                                   | A vs C:                                                     |
| B. >Lump                                               | 137/8329                                         | 14.3 | 239/7464      | 25.9 | X <sup>2</sup> <sub>1</sub> =45.8,<br>2p<0.001            | X <sup>2</sup> <sub>1</sub> =2.0,<br>2p=0.16                |
| C. Lump: low risk                                      | 55/9086                                          | 6.3  | 170/8585      | 19.9 | A+C vs B:<br>X <sup>2</sup> <sub>1</sub> =0.0,<br>2p=0.90 | A+C vs B:<br>X <sup>2</sup> <sub>1</sub> =17.2,<br>2p<0.001 |

\* Age at entry, tumour grade, tumour size, and ER status are characteristics of the individual women or their tumours; tamoxifen use, trial policy of additional therapy, and trial category are characteristics of the trials in which they were entered.

‡ Test for trend/heterogeneity in absolute reduction in recurrence rate.

§ Unadjusted: each factor alone.

¶ Adjusted: each factor adjusted for all others using regression modelling.

\*\* Category excluded from test for trend/heterogeneity.

†† Tamoxifen use: tamoxifen given to both trial arms. ER unknown included with ER+.

‡‡ Chemotherapy (usually CMF) given to both trials arms and/or nodal RT or boost given to those allocated BCS+RT.

§§ See table 1 in main paper for explanation of trial categories.

**Webfigure 7. Absolute reduction in 10-year risk (%) of any (locoregional or distant) first recurrence from radiotherapy (RT) after breast-conserving surgery (BCS) in pathologically node-negative women: dependence on prognostic and other factors suggested by modelling data from 7287 women.** Black bars give 10-year risks in women allocated to BCS+RT, black+white bars give 10-year risks in women allocated to BCS only, and white bars give absolute reduction with RT.

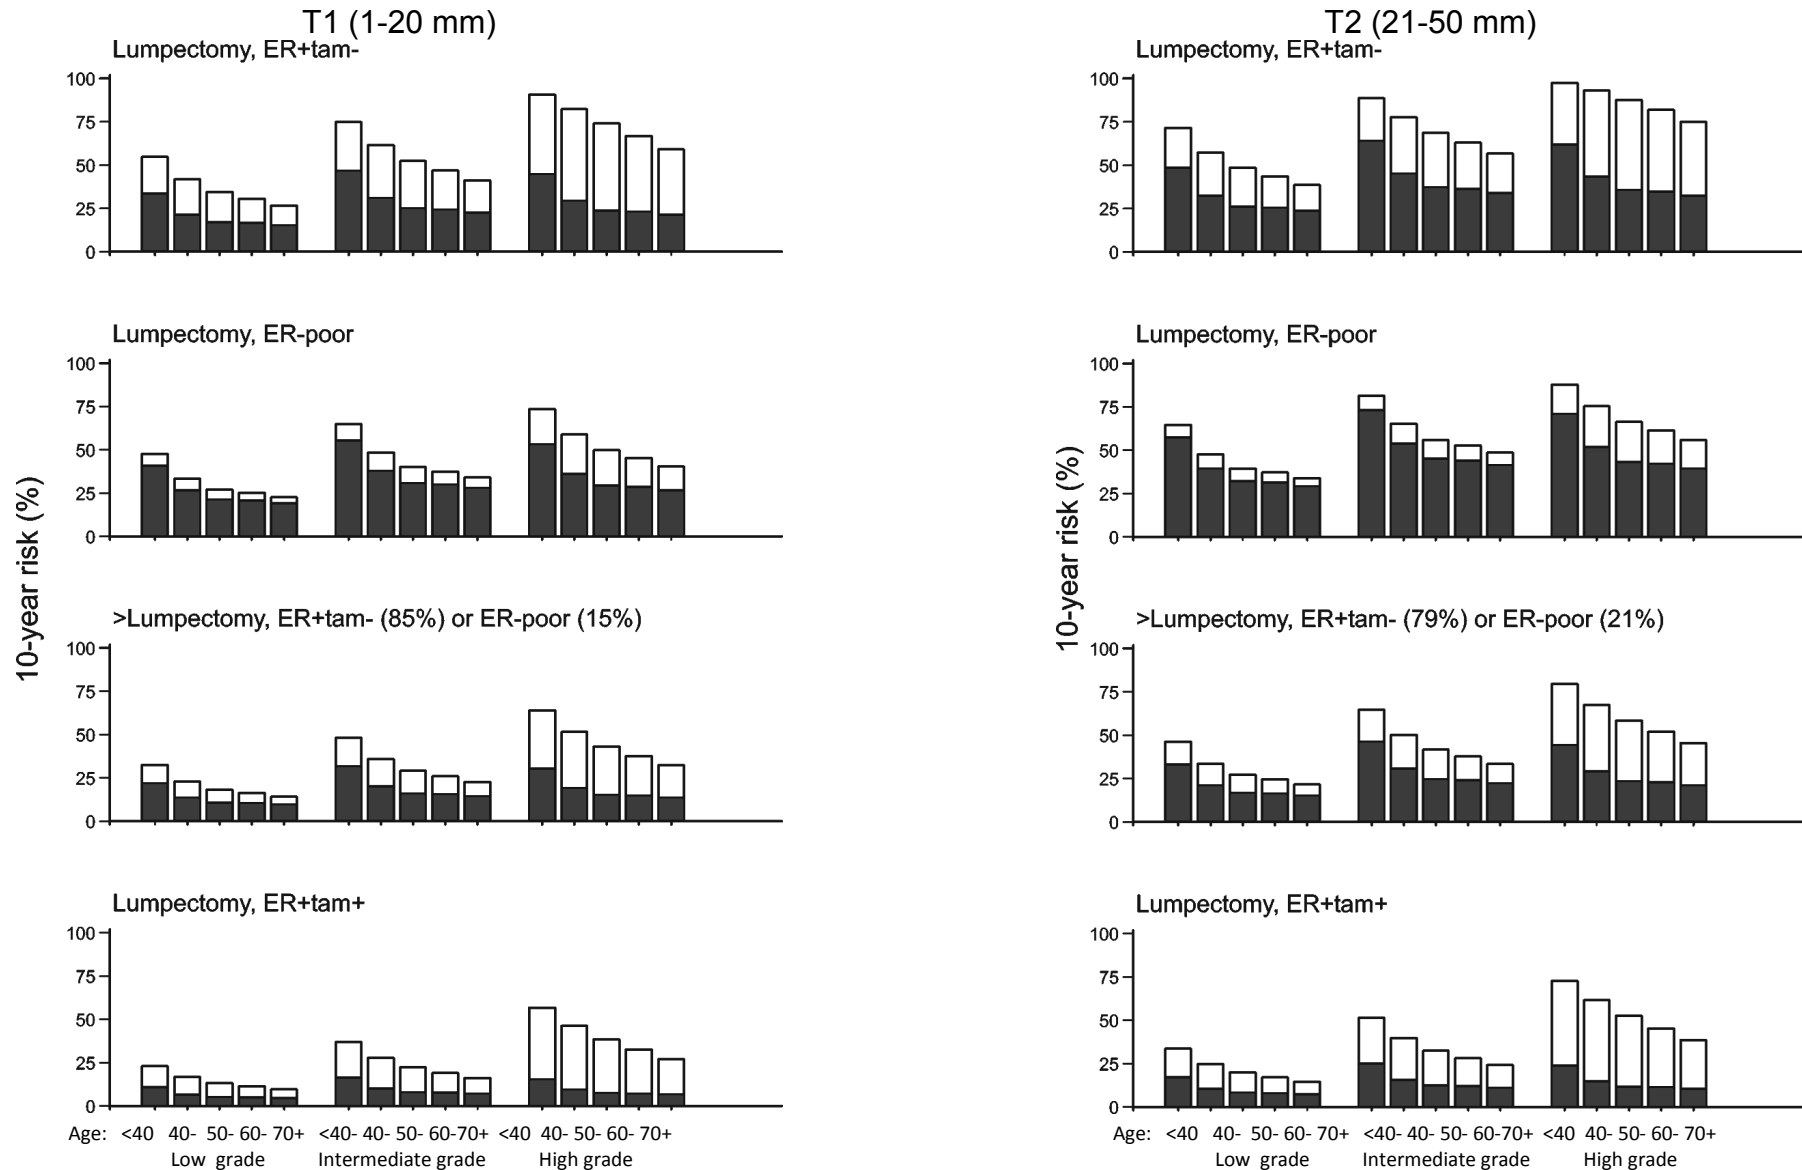

**Webtable 3a. 10-year risk (%) of any (locoregional or distant) first recurrence according to prognostic and other factors: Absolute reduction with radiotherapy (RT) after breast-conserving surgery (BCS) in pathologically node negative women.** Reductions of 20% and above are shown in dark boxes, 10-19% in light boxes, and less than 10% in clear boxes.

|                                  | Absolute reduction in 10-year risk of recurrence with radiotherapy (%) |    |    |    |     |                    |    |    |    |     |             |    |    |    |     |               |    |    |    |     |
|----------------------------------|------------------------------------------------------------------------|----|----|----|-----|--------------------|----|----|----|-----|-------------|----|----|----|-----|---------------|----|----|----|-----|
|                                  | Low grade                                                              |    |    |    |     | Intermediate grade |    |    |    |     | High grade  |    |    |    |     | Unknown grade |    |    |    |     |
|                                  | Age (years)                                                            |    |    |    |     | Age (years)        |    |    |    |     | Age (years) |    |    |    |     | Age (years)   |    |    |    |     |
|                                  | <40                                                                    | 40 | 50 | 60 | 70+ | <40                | 40 | 50 | 60 | 70+ | <40         | 40 | 50 | 60 | 70+ | <40           | 40 | 50 | 60 | 70+ |
| <b>T1 (1-20mm) tumours</b>       |                                                                        |    |    |    |     |                    |    |    |    |     |             |    |    |    |     |               |    |    |    |     |
| Lumpectomy, ER+tam-              | 21                                                                     | 21 | 17 | 14 | 11  | 28                 | 31 | 27 | 23 | 19  | 46          | 53 | 50 | 44 | 38  | 36            | 36 | 32 | 26 | 22  |
| Lumpectomy, ER-poor              | 7                                                                      | 7  | 6  | 4  | 4   | 9                  | 11 | 9  | 7  | 6   | 20          | 23 | 21 | 17 | 14  | 13            | 13 | 11 | 9  | 7   |
| >Lumpectomy, ER+tam- or ER-poor* | 10                                                                     | 9  | 7  | 6  | 5   | 17                 | 16 | 13 | 10 | 8   | 34          | 33 | 28 | 23 | 19  | 20            | 18 | 15 | 12 | 9   |
| Lumpectomy, ER+tam+              | 12                                                                     | 10 | 8  | 6  | 5   | 21                 | 18 | 15 | 12 | 9   | 41          | 37 | 31 | 25 | 20  | 23            | 20 | 16 | 13 | 10  |
| <b>T2 (21-50mm) tumours</b>      |                                                                        |    |    |    |     |                    |    |    |    |     |             |    |    |    |     |               |    |    |    |     |
| Lumpectomy, ER+tam-              | 23                                                                     | 25 | 22 | 18 | 15  | 25                 | 32 | 31 | 27 | 23  | 36          | 50 | 52 | 47 | 43  | 35            | 41 | 38 | 33 | 28  |
| Lumpectomy, ER-poor              | 7                                                                      | 8  | 7  | 6  | 5   | 8                  | 11 | 11 | 9  | 7   | 17          | 24 | 23 | 19 | 16  | 13            | 16 | 14 | 11 | 9   |
| >Lumpectomy, ER+tam- or ER-poor* | 13                                                                     | 12 | 10 | 8  | 7   | 19                 | 20 | 17 | 14 | 11  | 35          | 38 | 35 | 29 | 24  | 24            | 23 | 20 | 16 | 13  |
| Lumpectomy, ER+tam+              | 17                                                                     | 14 | 12 | 9  | 7   | 26                 | 24 | 20 | 16 | 13  | 49          | 47 | 41 | 34 | 28  | 31            | 27 | 23 | 18 | 15  |

**Webtable 3b. 10-year risk (%) of any (locoregional or distant) first recurrence according to prognostic and other factors: Absolute risks in pathologically node negative women allocated to breast-conserving surgery (BCS) and BCS+ radiotherapy (RT).**

|                                                          | 10-year risk of recurrence (%) |    |    |    |     |                    |    |    |    |     |             |    |    |    |     |               |    |    |    |     |
|----------------------------------------------------------|--------------------------------|----|----|----|-----|--------------------|----|----|----|-----|-------------|----|----|----|-----|---------------|----|----|----|-----|
|                                                          | Low grade                      |    |    |    |     | Intermediate grade |    |    |    |     | High grade  |    |    |    |     | Unknown grade |    |    |    |     |
|                                                          | Age (years)                    |    |    |    |     | Age (years)        |    |    |    |     | Age (years) |    |    |    |     | Age (years)   |    |    |    |     |
|                                                          | <40                            | 40 | 50 | 60 | 70+ | <40                | 40 | 50 | 60 | 70+ | <40         | 40 | 50 | 60 | 70+ | <40           | 40 | 50 | 60 | 70+ |
| <b>T1 (1-20mm) tumours in women allocated to BCS</b>     |                                |    |    |    |     |                    |    |    |    |     |             |    |    |    |     |               |    |    |    |     |
| Lumpectomy, ER+tam-                                      | 55                             | 42 | 34 | 30 | 27  | 75                 | 62 | 52 | 47 | 41  | 91          | 82 | 74 | 67 | 59  | 71            | 59 | 50 | 44 | 38  |
| Lumpectomy, ER-poor                                      | 48                             | 33 | 27 | 25 | 23  | 65                 | 48 | 40 | 37 | 34  | 73          | 59 | 50 | 45 | 40  | 56            | 41 | 34 | 31 | 27  |
| >Lumpectomy, ER+tam- or ER-poor*                         | 32                             | 23 | 18 | 16 | 14  | 48                 | 36 | 29 | 26 | 23  | 64          | 52 | 43 | 38 | 32  | 43            | 32 | 26 | 23 | 20  |
| Lumpectomy, ER+tam+                                      | 23                             | 17 | 13 | 11 | 10  | 37                 | 28 | 22 | 19 | 16  | 57          | 46 | 38 | 32 | 27  | 35            | 27 | 22 | 18 | 15  |
| <b>T1 (1-20mm) tumours in women allocated to BCS+RT</b>  |                                |    |    |    |     |                    |    |    |    |     |             |    |    |    |     |               |    |    |    |     |
| Lumpectomy, ER+tam-                                      | 33                             | 21 | 17 | 16 | 15  | 47                 | 31 | 25 | 24 | 23  | 45          | 29 | 24 | 23 | 21  | 35            | 23 | 18 | 17 | 16  |
| Lumpectomy, ER-poor                                      | 41                             | 26 | 21 | 21 | 19  | 55                 | 38 | 31 | 30 | 28  | 53          | 36 | 29 | 29 | 27  | 43            | 28 | 22 | 22 | 20  |
| >Lumpectomy, ER+tam- or ER-poor*                         | 22                             | 14 | 11 | 10 | 10  | 32                 | 20 | 16 | 16 | 14  | 30          | 19 | 15 | 15 | 14  | 23            | 14 | 11 | 11 | 10  |
| Lumpectomy, ER+tam+                                      | 11                             | 7  | 5  | 5  | 5   | 16                 | 10 | 8  | 8  | 7   | 15          | 9  | 7  | 7  | 7   | 11            | 7  | 5  | 5  | 5   |
| <b>T2 (21-50mm) tumours in women allocated to BCS</b>    |                                |    |    |    |     |                    |    |    |    |     |             |    |    |    |     |               |    |    |    |     |
| Lumpectomy, ER+tam-                                      | 71                             | 57 | 48 | 44 | 39  | 89                 | 78 | 69 | 63 | 57  | 97          | 93 | 88 | 82 | 75  | 86            | 75 | 66 | 59 | 52  |
| Lumpectomy, ER-poor                                      | 65                             | 48 | 39 | 37 | 34  | 81                 | 65 | 56 | 53 | 49  | 88          | 75 | 66 | 61 | 56  | 73            | 57 | 48 | 44 | 40  |
| >Lumpectomy, ER+tam- or ER-poor*                         | 46                             | 33 | 27 | 25 | 22  | 65                 | 50 | 42 | 38 | 33  | 80          | 68 | 58 | 52 | 46  | 59            | 46 | 38 | 33 | 29  |
| Lumpectomy, ER+tam+                                      | 34                             | 25 | 20 | 17 | 15  | 51                 | 40 | 32 | 28 | 24  | 73          | 62 | 52 | 45 | 38  | 49            | 38 | 31 | 27 | 22  |
| <b>T2 (21-50mm) tumours in women allocated to BCS+RT</b> |                                |    |    |    |     |                    |    |    |    |     |             |    |    |    |     |               |    |    |    |     |
| Lumpectomy, ER+tam-                                      | 48                             | 32 | 26 | 25 | 24  | 64                 | 45 | 37 | 36 | 34  | 62          | 43 | 36 | 35 | 32  | 51            | 34 | 28 | 27 | 25  |
| Lumpectomy, ER-poor                                      | 57                             | 39 | 32 | 31 | 29  | 73                 | 54 | 45 | 44 | 41  | 71          | 52 | 43 | 42 | 39  | 59            | 41 | 34 | 33 | 31  |
| >Lumpectomy, ER+tam- or ER-poor*                         | 33                             | 21 | 17 | 16 | 15  | 46                 | 31 | 25 | 24 | 22  | 44          | 29 | 23 | 23 | 21  | 35            | 22 | 18 | 17 | 16  |
| Lumpectomy, ER+tam+                                      | 17                             | 10 | 8  | 8  | 7   | 25                 | 16 | 12 | 12 | 11  | 24          | 15 | 12 | 11 | 10  | 18            | 11 | 9  | 8  | 8   |

\* No tamoxifen planned for pN0 women in these trials

**Webtable 3c. Numbers of pathologically node negative women in trials of radiotherapy after breast-conserving surgery according to prognostic and other factors.** When all the factors that are influential in determining the absolute reduction in the 10-year risk of recurrence are considered simultaneously, the numbers of women in each individual category are too small to provide meaningful estimates based only on the women in that category. Therefore, the dependence of the effect of radiotherapy on all the independently prognostic and other factors simultaneously was estimated using the regression model given in webappendix p20. The 10 parameters in that model summarise the overall trends with respect to age, grade, tumour size, etc in the whole data set and they have been used to provide much more stable estimates of the likely effect of radiotherapy for specific combinations of age, grade, tumour size etc than would be the case if the estimate for each individual category used only the women in that category as given in the table below.

| Tumour size T1 (1-20 mm)         | Low grade   |    |     |     |     | Intermediate grade |    |     |     |     | High grade  |    |    |    |     | Unknown grade |     |     |     |     |
|----------------------------------|-------------|----|-----|-----|-----|--------------------|----|-----|-----|-----|-------------|----|----|----|-----|---------------|-----|-----|-----|-----|
|                                  | Age (years) |    |     |     |     | Age (years)        |    |     |     |     | Age (years) |    |    |    |     | Age (years)   |     |     |     |     |
|                                  | <40         | 40 | 50  | 60  | 70+ | <40                | 40 | 50  | 60  | 70+ | <40         | 40 | 50 | 60 | 70+ | <40           | 40  | 50  | 60  | 70+ |
| Lumpectomy, ER+tam-              | 7           | 60 | 168 | 173 | 34  | 21                 | 64 | 85  | 82  | 22  | 28          | 46 | 50 | 42 | 5   | 23            | 59  | 111 | 110 | 35  |
| Lumpectomy, ER-poor              | 4           | 11 | 14  | 9   | 3   | 9                  | 18 | 24  | 13  | 5   | 30          | 31 | 24 | 21 | 1   | 14            | 18  | 17  | 15  | 7   |
| >Lumpectomy, ER+tam- or ER-poor* | 0           | 5  | 9   | 11  | 9   | 2                  | 15 | 29  | 46  | 28  | 12          | 37 | 45 | 68 | 41  | 55            | 282 | 437 | 506 | 132 |
| Lumpectomy, ER+tam+              | 8           | 73 | 309 | 286 | 188 | 7                  | 53 | 232 | 341 | 261 | 8           | 19 | 37 | 37 | 22  | 10            | 45  | 130 | 136 | 378 |
| <b>Tumour size T2 (21-50 mm)</b> |             |    |     |     |     |                    |    |     |     |     |             |    |    |    |     |               |     |     |     |     |
| Tumour size T2 (21-50 mm)        | Low grade   |    |     |     |     | Intermediate grade |    |     |     |     | High grade  |    |    |    |     | Unknown grade |     |     |     |     |
|                                  | Age (years) |    |     |     |     | Age (years)        |    |     |     |     | Age (years) |    |    |    |     | Age (years)   |     |     |     |     |
|                                  | <40         | 40 | 50  | 60  | 70+ | <40                | 40 | 50  | 60  | 70+ | <40         | 40 | 50 | 60 | 70+ | <40           | 40  | 50  | 60  | 70+ |
| Lumpectomy, ER+tam-              | 3           | 12 | 16  | 15  | 3   | 13                 | 22 | 27  | 47  | 14  | 19          | 27 | 33 | 38 | 3   | 11            | 15  | 34  | 24  | 19  |
| Lumpectomy, ER-poor              | 1           | 3  | 0   | 1   | 1   | 3                  | 13 | 10  | 13  | 1   | 17          | 37 | 35 | 18 | 3   | 4             | 10  | 14  | 16  | 2   |
| >Lumpectomy, ER+tam- or ER-poor* | 0           | 0  | 0   | 0   | 0   | 0                  | 0  | 2   | 1   | 1   | 1           | 2  | 2  | 3  | 2   | 6             | 42  | 47  | 46  | 13  |
| Lumpectomy, ER+tam+              | 0           | 0  | 5   | 12  | 22  | 1                  | 6  | 16  | 30  | 51  | 0           | 3  | 4  | 6  | 4   | 4             | 3   | 24  | 27  | 17  |
| <b>Tumour size unknown</b>       |             |    |     |     |     |                    |    |     |     |     |             |    |    |    |     |               |     |     |     |     |
| Tumour size unknown              | Low grade   |    |     |     |     | Intermediate grade |    |     |     |     | High grade  |    |    |    |     | Unknown grade |     |     |     |     |
|                                  | Age (years) |    |     |     |     | Age (years)        |    |     |     |     | Age (years) |    |    |    |     | Age (years)   |     |     |     |     |
|                                  | <40         | 40 | 50  | 60  | 70+ | <40                | 40 | 50  | 60  | 70+ | <40         | 40 | 50 | 60 | 70+ | <40           | 40  | 50  | 60  | 70+ |
| Lumpectomy, ER+tam-              | 0           | 2  | 3   | 2   | 1   | 1                  | 3  | 1   | 1   | 0   | 1           | 0  | 0  | 0  | 0   | 1             | 4   | 9   | 7   | 0   |
| Lumpectomy, ER-poor              | 0           | 0  | 0   | 0   | 0   | 0                  | 0  | 0   | 1   | 0   | 0           | 1  | 2  | 1  | 0   | 19            | 31  | 16  | 14  | 0   |
| >Lumpectomy, ER+tam- or ER-poor* | 0           | 0  | 0   | 0   | 0   | 0                  | 0  | 0   | 0   | 0   | 0           | 0  | 0  | 0  | 0   | 1             | 4   | 10  | 3   | 1   |
| Lumpectomy, ER+tam+              | 1           | 5  | 7   | 9   | 2   | 2                  | 6  | 7   | 5   | 4   | 0           | 5  | 4  | 3  | 1   | 16            | 66  | 72  | 66  | 4   |

**Webtable 4. Effect of radiotherapy (RT) after breast-conserving surgery (BCS) on 5-year risk (%) of first recurrence of any type (locoregional or distant) in 7287 pathologically node-negative women according to prognostic and other factors.**

| Factor*                                                | Events/woman-year in years 0-4<br>(5-yr risk %) |      |               |      | Test for trend or heterogeneity‡                          |                                                             |
|--------------------------------------------------------|-------------------------------------------------|------|---------------|------|-----------------------------------------------------------|-------------------------------------------------------------|
|                                                        | Allocated BCS+RT                                |      | Allocated BCS |      | Unadjusted§                                               | Adjusted¶                                                   |
| <b>Age at entry (years)</b>                            |                                                 |      |               |      |                                                           |                                                             |
| < 40                                                   | 66/711                                          | 33.0 | 86/547        | 51.8 | X <sup>2</sup> <sub>1</sub> =28.1,<br>2p<0.001            | X <sup>2</sup> <sub>1</sub> =11.6,<br>2p <0.001             |
| 40 – 49                                                | 94/2531                                         | 15.4 | 193/2242      | 34.0 |                                                           |                                                             |
| 50 – 59                                                | 118/4899                                        | 15.0 | 218/4285      | 22.3 |                                                           |                                                             |
| 60 – 69                                                | 91/5111                                         | 8.3  | 202/4897      | 18.4 |                                                           |                                                             |
| 70+                                                    | 27/2928                                         | 4.4  | 63/2802       | 10.9 |                                                           |                                                             |
| <b>Tumour grade</b>                                    |                                                 |      |               |      |                                                           |                                                             |
| Low                                                    | 30/3321                                         | 4.6  | 78/3315       | 11.5 | X <sup>2</sup> <sub>1</sub> =54.9,<br>2p<0.001            | X <sup>2</sup> <sub>1</sub> =29.6,<br>2p <0.001             |
| Intermediate                                           | 97/3485                                         | 11.5 | 176/3311      | 23.4 |                                                           |                                                             |
| High                                                   | 103/1823                                        | 22.0 | 193/1381      | 45.8 |                                                           |                                                             |
| Unknown**                                              | 166/7551                                        | 9.9  | 315/6767      | 20.6 |                                                           |                                                             |
| <b>Tumour size</b>                                     |                                                 |      |               |      |                                                           |                                                             |
| T1 (1-20 mm)                                           | 240/13211                                       | 8.0  | 513/12313     | 18.9 | X <sup>2</sup> <sub>1</sub> =10.0,<br>2p=0.002            | X <sup>2</sup> <sub>1</sub> =5.2,<br>2p=0.02                |
| T2 (21-50 mm)                                          | 122/2047                                        | 23.3 | 205/1601      | 43.5 |                                                           |                                                             |
| Other/unknown**                                        | 34/921                                          | 17.5 | 44/860        | 22.5 |                                                           |                                                             |
| <b>ER status &amp; trial policy of tamoxifen use††</b> |                                                 |      |               |      |                                                           |                                                             |
| ER-poor                                                | 109/1830                                        | 24.9 | 158/1553      | 37.1 | 2p<0.001                                                  | 2p<0.001                                                    |
| ER+Tam-                                                | 225/7499                                        | 12.7 | 448/6453      | 28.6 |                                                           |                                                             |
| ER+Tam+                                                | 62/6851                                         | 4.5  | 156/6768      | 11.2 |                                                           |                                                             |
| <b>Trial policy of additional therapy**</b>            |                                                 |      |               |      |                                                           |                                                             |
| No                                                     | 190/6646                                        | 11.8 | 361/5944      | 25.9 | X <sup>2</sup> <sub>1</sub> =11.0,<br>2p<0.001            | X <sup>2</sup> <sub>1</sub> =0.3,<br>2p=0.58                |
| Yes                                                    | 198/9310                                        | 9.6  | 388/8602      | 20.2 |                                                           |                                                             |
| Some/Unknown**                                         | 8/224                                           | 17.1 | 13/227        | 23.8 |                                                           |                                                             |
| <b>Trial category§§</b>                                |                                                 |      |               |      |                                                           |                                                             |
| A. Lump: original                                      | 264/5153                                        | 21.1 | 469/4313      | 39.8 | A vs C:                                                   | A vs C:                                                     |
| B. >Lump                                               | 95/4553                                         | 9.7  | 183/4208      | 19.4 | X <sup>2</sup> <sub>1</sub> =53.2,<br>2p<0.001            | X <sup>2</sup> <sub>1</sub> =2.0,<br>2p=0.15                |
| C. Lump: low risk                                      | 37/6474                                         | 2.9  | 110/6254      | 8.6  | A+C vs B:<br>X <sup>2</sup> <sub>1</sub> =2.5,<br>2p=0.12 | A+C vs B:<br>X <sup>2</sup> <sub>1</sub> =17.1,<br>2p<0.001 |

\* Age at entry, tumour grade, tumour size, and ER status are characteristics of the individual women or their tumours; tamoxifen use, trial policy of additional therapy, and trial category are characteristics of the trials in which they were entered.  
‡ Test for trend/heterogeneity in absolute reduction in recurrence rate.

§ Unadjusted: each factor alone.

¶ Adjusted: each factor adjusted for all others using regression modelling.

\*\* Category excluded from test for trend/heterogeneity.

†† Tamoxifen use: tamoxifen given to both trial arms. ER unknown included with ER+.

‡‡ Chemotherapy (usually CMF) given to both trials arms and/or nodal RT or boost given to those allocated BCS+RT.

§§ See table 1 in main paper for explanation of trial categories.



**Webfigure 8. Absolute reduction in 5-year risk (%) of any (locoregional or distant) first recurrence from radiotherapy (RT) after breast-conserving surgery (BCS) in pathologically node-negative women: dependence on prognostic and other factors suggested by modelling data from 7287 women.** Black bars give 5-year risks in women allocated to BCS+RT, black+white bars give 5-year risks in women allocated to BCS only, and white bars give absolute reduction with RT.

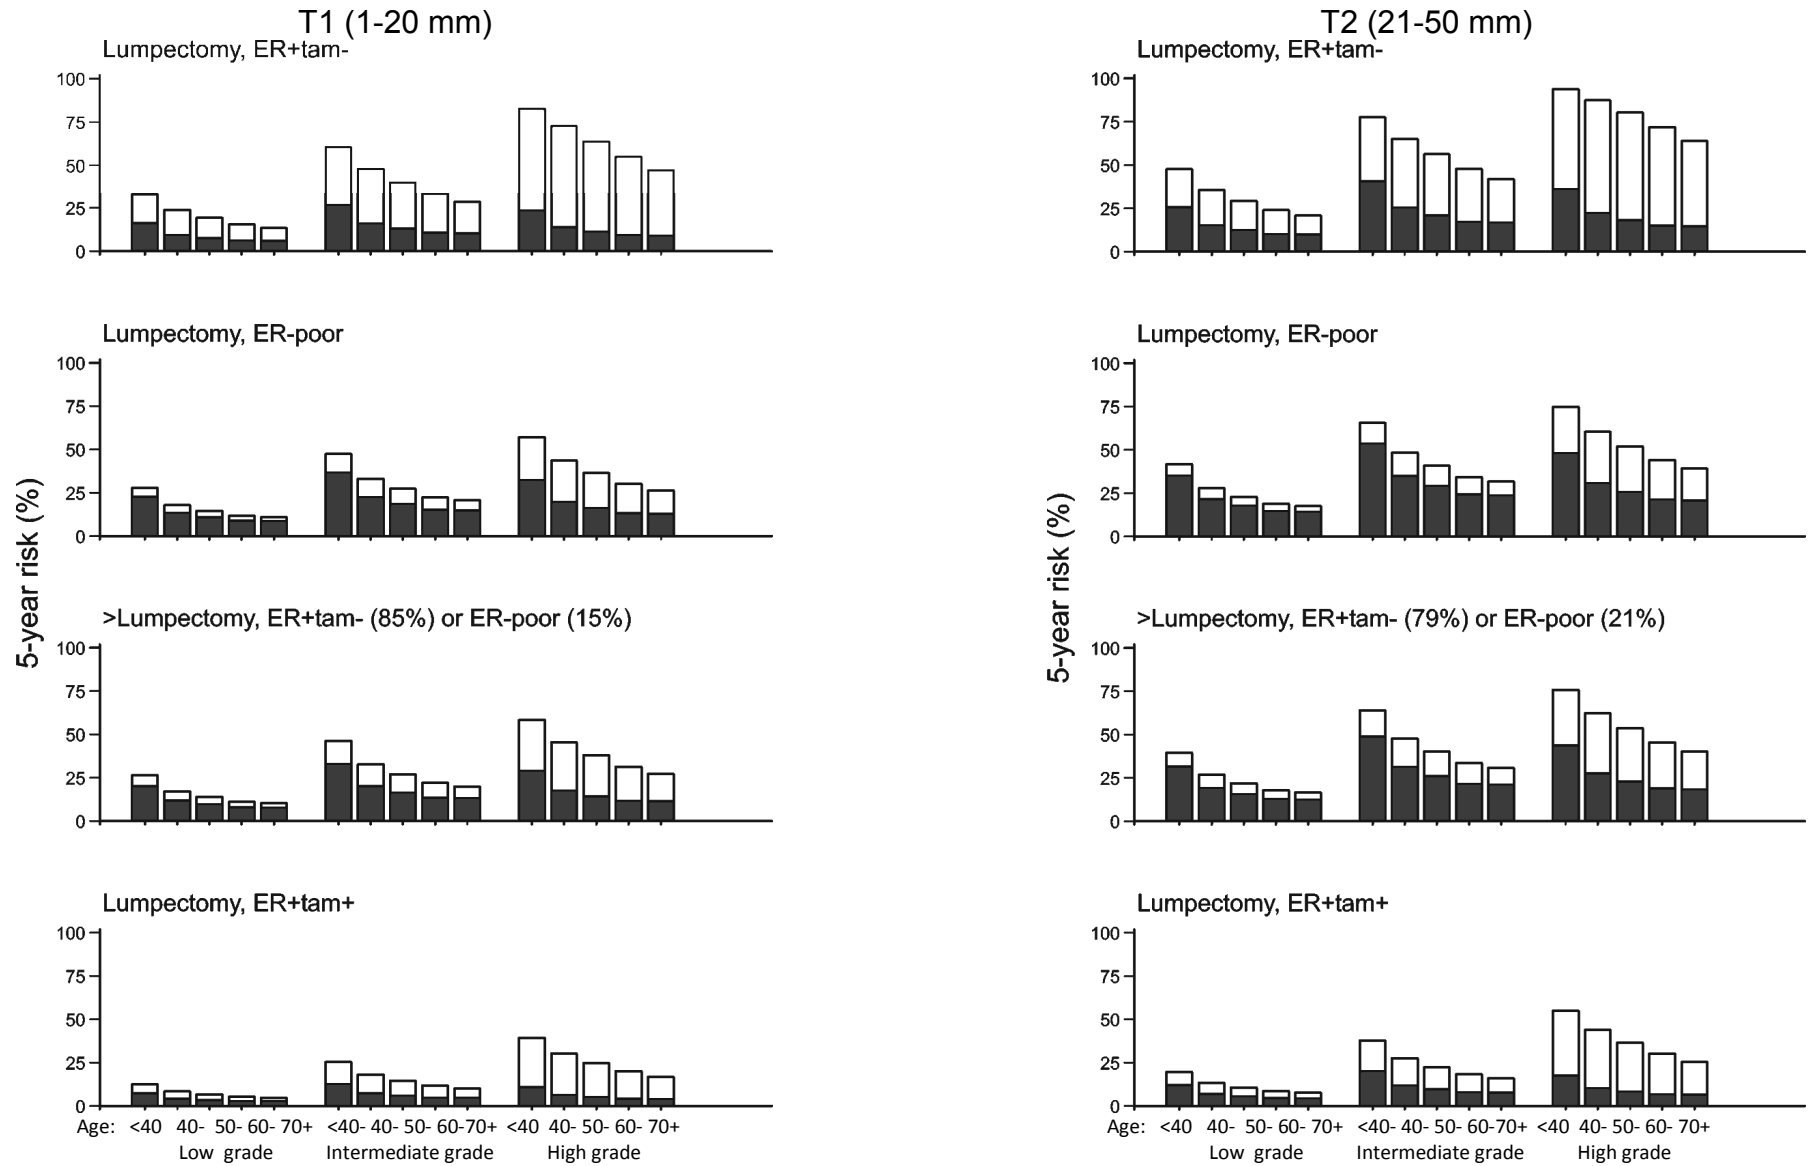

**Webtable 5a. 5-year risk (%) of any (locoregional or distant) first recurrence according to prognostic and other factors: Absolute reduction with radiotherapy (RT) after breast-conserving surgery (BCS) in pathologically node negative women.** Reductions of 20% and above are shown in dark boxes, 10-19% in light boxes, and less than 10% in clear boxes.

|                                  | Absolute reduction in 5-year risk of recurrence with radiotherapy (%) |    |    |    |     |                    |    |    |    |     |             |    |    |    |     |               |    |    |    |     |
|----------------------------------|-----------------------------------------------------------------------|----|----|----|-----|--------------------|----|----|----|-----|-------------|----|----|----|-----|---------------|----|----|----|-----|
|                                  | Low grade                                                             |    |    |    |     | Intermediate grade |    |    |    |     | High grade  |    |    |    |     | Unknown grade |    |    |    |     |
|                                  | Age (years)                                                           |    |    |    |     | Age (years)        |    |    |    |     | Age (years) |    |    |    |     | Age (years)   |    |    |    |     |
|                                  | <40                                                                   | 40 | 50 | 60 | 70+ | <40                | 40 | 50 | 60 | 70+ | <40         | 40 | 50 | 60 | 70+ | <40           | 40 | 50 | 60 | 70+ |
| <b>T1 (1-20mm) tumours</b>       |                                                                       |    |    |    |     |                    |    |    |    |     |             |    |    |    |     |               |    |    |    |     |
| Lumpectomy, ER+tam-              | 17                                                                    | 14 | 12 | 9  | 7   | 34                 | 32 | 27 | 23 | 18  | 59          | 59 | 53 | 46 | 38  | 37            | 34 | 28 | 23 | 19  |
| Lumpectomy, ER-poor              | 5                                                                     | 5  | 4  | 3  | 2   | 11                 | 11 | 9  | 7  | 6   | 25          | 24 | 20 | 17 | 14  | 13            | 11 | 9  | 8  | 6   |
| >Lumpectomy, ER+tam- or ER-poor* | 6                                                                     | 5  | 4  | 3  | 3   | 13                 | 13 | 11 | 9  | 7   | 29          | 28 | 24 | 20 | 16  | 15            | 14 | 11 | 9  | 7   |
| Lumpectomy, ER+tam+              | 5                                                                     | 4  | 3  | 3  | 2   | 13                 | 11 | 9  | 7  | 5   | 28          | 24 | 20 | 16 | 13  | 13            | 11 | 9  | 7  | 5   |
| <b>T2 (21-50mm) tumours</b>      |                                                                       |    |    |    |     |                    |    |    |    |     |             |    |    |    |     |               |    |    |    |     |
| Lumpectomy, ER+tam-              | 22                                                                    | 20 | 17 | 14 | 11  | 37                 | 40 | 35 | 31 | 25  | 58          | 65 | 62 | 57 | 49  | 44            | 44 | 38 | 32 | 27  |
| Lumpectomy, ER-poor              | 7                                                                     | 6  | 5  | 4  | 3   | 12                 | 14 | 12 | 10 | 8   | 27          | 30 | 26 | 23 | 19  | 16            | 16 | 13 | 11 | 9   |
| >Lumpectomy, ER+tam- or ER-poor* | 8                                                                     | 8  | 6  | 5  | 4   | 15                 | 16 | 14 | 12 | 10  | 32          | 35 | 31 | 27 | 22  | 19            | 19 | 16 | 13 | 10  |
| Lumpectomy, ER+tam+              | 8                                                                     | 6  | 5  | 4  | 3   | 18                 | 16 | 13 | 10 | 8   | 37          | 34 | 28 | 23 | 19  | 19            | 16 | 13 | 11 | 8   |

\* No tamoxifen planned for pN0 women in these trials

**Webtable 5b. 5-year risk (%) of any (locoregional or distant) first recurrence according to prognostic and other factors: Absolute risks in pathologically node negative women allocated to breast-conserving surgery (BCS) and BCS+ radiotherapy (RT).**

|                                                          | 5-year risk of recurrence (%) |    |    |    |     |                    |    |    |    |     |             |    |    |    |     |               |    |    |    |     |
|----------------------------------------------------------|-------------------------------|----|----|----|-----|--------------------|----|----|----|-----|-------------|----|----|----|-----|---------------|----|----|----|-----|
|                                                          | Low grade                     |    |    |    |     | Intermediate grade |    |    |    |     | High grade  |    |    |    |     | Unknown grade |    |    |    |     |
|                                                          | Age (years)                   |    |    |    |     | Age (years)        |    |    |    |     | Age (years) |    |    |    |     | Age (years)   |    |    |    |     |
|                                                          | <40                           | 40 | 50 | 60 | 70+ | <40                | 40 | 50 | 60 | 70+ | <40         | 40 | 50 | 60 | 70+ | <40           | 40 | 50 | 60 | 70+ |
| <b>T1 (1-20mm) tumours in women allocated to BCS</b>     |                               |    |    |    |     |                    |    |    |    |     |             |    |    |    |     |               |    |    |    |     |
| Lumpectomy, ER+tam-                                      | 33                            | 24 | 19 | 16 | 13  | 60                 | 48 | 40 | 33 | 29  | 82          | 73 | 64 | 55 | 47  | 55            | 44 | 37 | 30 | 26  |
| Lumpectomy, ER-poor                                      | 28                            | 18 | 15 | 12 | 11  | 48                 | 33 | 27 | 23 | 21  | 57          | 44 | 36 | 30 | 26  | 38            | 27 | 22 | 18 | 16  |
| >Lumpectomy, ER+tam- or ER-poor*                         | 26                            | 17 | 14 | 11 | 10  | 46                 | 33 | 27 | 22 | 20  | 58          | 45 | 38 | 31 | 27  | 38            | 27 | 22 | 18 | 16  |
| Lumpectomy, ER+tam+                                      | 12                            | 8  | 7  | 5  | 5   | 25                 | 18 | 14 | 12 | 10  | 39          | 30 | 25 | 20 | 17  | 21            | 16 | 13 | 10 | 8   |
| <b>T1 (1-20mm) tumours in women allocated to BCS+RT</b>  |                               |    |    |    |     |                    |    |    |    |     |             |    |    |    |     |               |    |    |    |     |
| Lumpectomy, ER+tam-                                      | 16                            | 9  | 8  | 6  | 6   | 27                 | 16 | 13 | 11 | 10  | 23          | 14 | 11 | 9  | 9   | 18            | 11 | 9  | 7  | 7   |
| Lumpectomy, ER-poor                                      | 23                            | 13 | 11 | 9  | 9   | 37                 | 22 | 18 | 15 | 15  | 32          | 20 | 16 | 13 | 13  | 25            | 15 | 12 | 10 | 10  |
| >Lumpectomy, ER+tam- or ER-poor*                         | 20                            | 12 | 10 | 8  | 8   | 33                 | 20 | 16 | 13 | 13  | 29          | 17 | 14 | 12 | 11  | 23            | 13 | 11 | 9  | 9   |
| Lumpectomy, ER+tam+                                      | 7                             | 4  | 3  | 3  | 3   | 12                 | 7  | 6  | 5  | 5   | 11          | 6  | 5  | 4  | 4   | 8             | 5  | 4  | 3  | 3   |
| <b>T2 (21-50mm) tumours in women allocated to BCS</b>    |                               |    |    |    |     |                    |    |    |    |     |             |    |    |    |     |               |    |    |    |     |
| Lumpectomy, ER+tam-                                      | 48                            | 36 | 29 | 24 | 21  | 78                 | 65 | 56 | 48 | 42  | 94          | 87 | 80 | 72 | 64  | 72            | 61 | 52 | 44 | 38  |
| Lumpectomy, ER-poor                                      | 42                            | 28 | 23 | 19 | 18  | 66                 | 48 | 41 | 34 | 32  | 75          | 60 | 52 | 44 | 39  | 54            | 40 | 33 | 27 | 25  |
| >Lumpectomy, ER+tam- or ER-poor*                         | 40                            | 27 | 22 | 18 | 16  | 64                 | 48 | 40 | 34 | 31  | 76          | 62 | 54 | 46 | 40  | 54            | 40 | 33 | 27 | 24  |
| Lumpectomy, ER+tam+                                      | 20                            | 13 | 11 | 9  | 8   | 38                 | 27 | 22 | 18 | 16  | 55          | 44 | 36 | 30 | 25  | 32            | 24 | 19 | 16 | 13  |
| <b>T2 (21-50mm) tumours in women allocated to BCS+RT</b> |                               |    |    |    |     |                    |    |    |    |     |             |    |    |    |     |               |    |    |    |     |
| Lumpectomy, ER+tam-                                      | 26                            | 15 | 12 | 10 | 10  | 41                 | 25 | 21 | 17 | 17  | 36          | 22 | 18 | 15 | 15  | 29            | 17 | 14 | 11 | 11  |
| Lumpectomy, ER-poor                                      | 35                            | 21 | 18 | 15 | 14  | 53                 | 35 | 29 | 24 | 24  | 48          | 31 | 26 | 21 | 21  | 39            | 24 | 20 | 16 | 16  |
| >Lumpectomy, ER+tam- or ER-poor*                         | 31                            | 19 | 16 | 13 | 12  | 49                 | 31 | 26 | 22 | 21  | 44          | 27 | 23 | 19 | 18  | 35            | 21 | 18 | 14 | 14  |
| Lumpectomy, ER+tam+                                      | 12                            | 7  | 6  | 4  | 4   | 20                 | 12 | 10 | 8  | 8   | 17          | 10 | 8  | 7  | 7   | 13            | 8  | 6  | 5  | 5   |

\* No tamoxifen planned for pN0 women in these trials

**Webtable 6. Risks of any (locoregional or distant) first recurrence and breast cancer mortality in 7287 pathologically node-negative women given breast-conserving surgery (BCS) according to predicted absolute benefit with radiotherapy (RT) in 10-year risk suggested by modelling of predictive factors.**

| Predicted absolute benefit* | Total number of women | Number of women by trial category |            |            | Number of women with follow-up at least: |      |      | Any first recurrence |      |                        | Breast cancer mortality |      |                        |
|-----------------------------|-----------------------|-----------------------------------|------------|------------|------------------------------------------|------|------|----------------------|------|------------------------|-------------------------|------|------------------------|
|                             |                       | A (%)                             | B (%)      | C (%)      | 5y                                       | 10y  | 15y  | 10-year risk (%)†    |      | Gain with RT‡ (95% CI) | 15-year risk (%)†       |      | Gain with RT‡ (95% CI) |
|                             |                       |                                   |            |            |                                          |      |      | Allocated BCS+RT     | BCS  |                        | Allocated BCS+RT        | BCS  |                        |
| Large                       | 1924                  | 1342 (56)                         | 322 (16)   | 260 (9)    | 1672                                     | 1198 | 581  | 26.0                 | 50.3 | 24.3 (19.6, 29.0)      | 23.2                    | 31.0 | 7.8 (3.1, 12.5)        |
| Intermediate                | 3763                  | 784 (32)                          | 1436 (74)  | 1543 (53)  | 3096                                     | 1850 | 525  | 12.4                 | 24.8 | 12.4 (9.7, 15.1)§      | 13.9                    | 15.0 | 1.1 (-2.0, 4.2)¶       |
| Lower                       | 1600                  | 294 (12)                          | 198 (10)   | 1108 (38)  | 1084                                     | 458  | 118  | 12.0                 | 18.9 | 6.9 (2.2, 11.6)§       | 16.5                    | 16.6 | 0.1 (-7.5, 7.7)¶       |
| Total                       | 7287                  | 2420 (100)                        | 1956 (100) | 2911 (100) | 5852                                     | 3506 | 1224 |                      |      |                        |                         |      |                        |
| 2p for trend                |                       |                                   |            |            |                                          |      |      |                      |      | <0.00001               | 0.03                    |      |                        |

\* Women allocated to categories using regression-based estimates of absolute reduction in 10-year risk of any first recurrence in main paper figure 4 and webappendix p28.

† 10-year risks of any first recurrence and 15-year risks of breast cancer mortality calculated directly from data on individual women.

‡ ie, reduction in absolute risk.

§ For intermediate and lower categories combined, 10-year risks for any first recurrence: BCS+RT: 12.1%, BCS:23.1%, gain with RT 11.0% (95% CI: 8.6, 13.4).

¶ For intermediate and lower categories combined, 15-year risk for breast cancer mortality: BCS+RT: 14.4%, BCS:15.1%, gain with RT 0.7% (95% CI: -2.2, 3.6)

**Webfigure 9a. Risks of any (locoregional or distant) first recurrence in 7287 pathologically node-negative women given breast-conserving surgery (BCS) according to predicted absolute benefit with radiotherapy (RT) in 10-year risk suggested by modelling of prognostic and other factors.** Women allocated to categories of predicted absolute benefit using the results of the modelling of prognostic and other factors (see figure 4). Risks calculated directly from data on individual women. Vertical lines indicate 1 SE above or below the 5 and 10 year percentages.

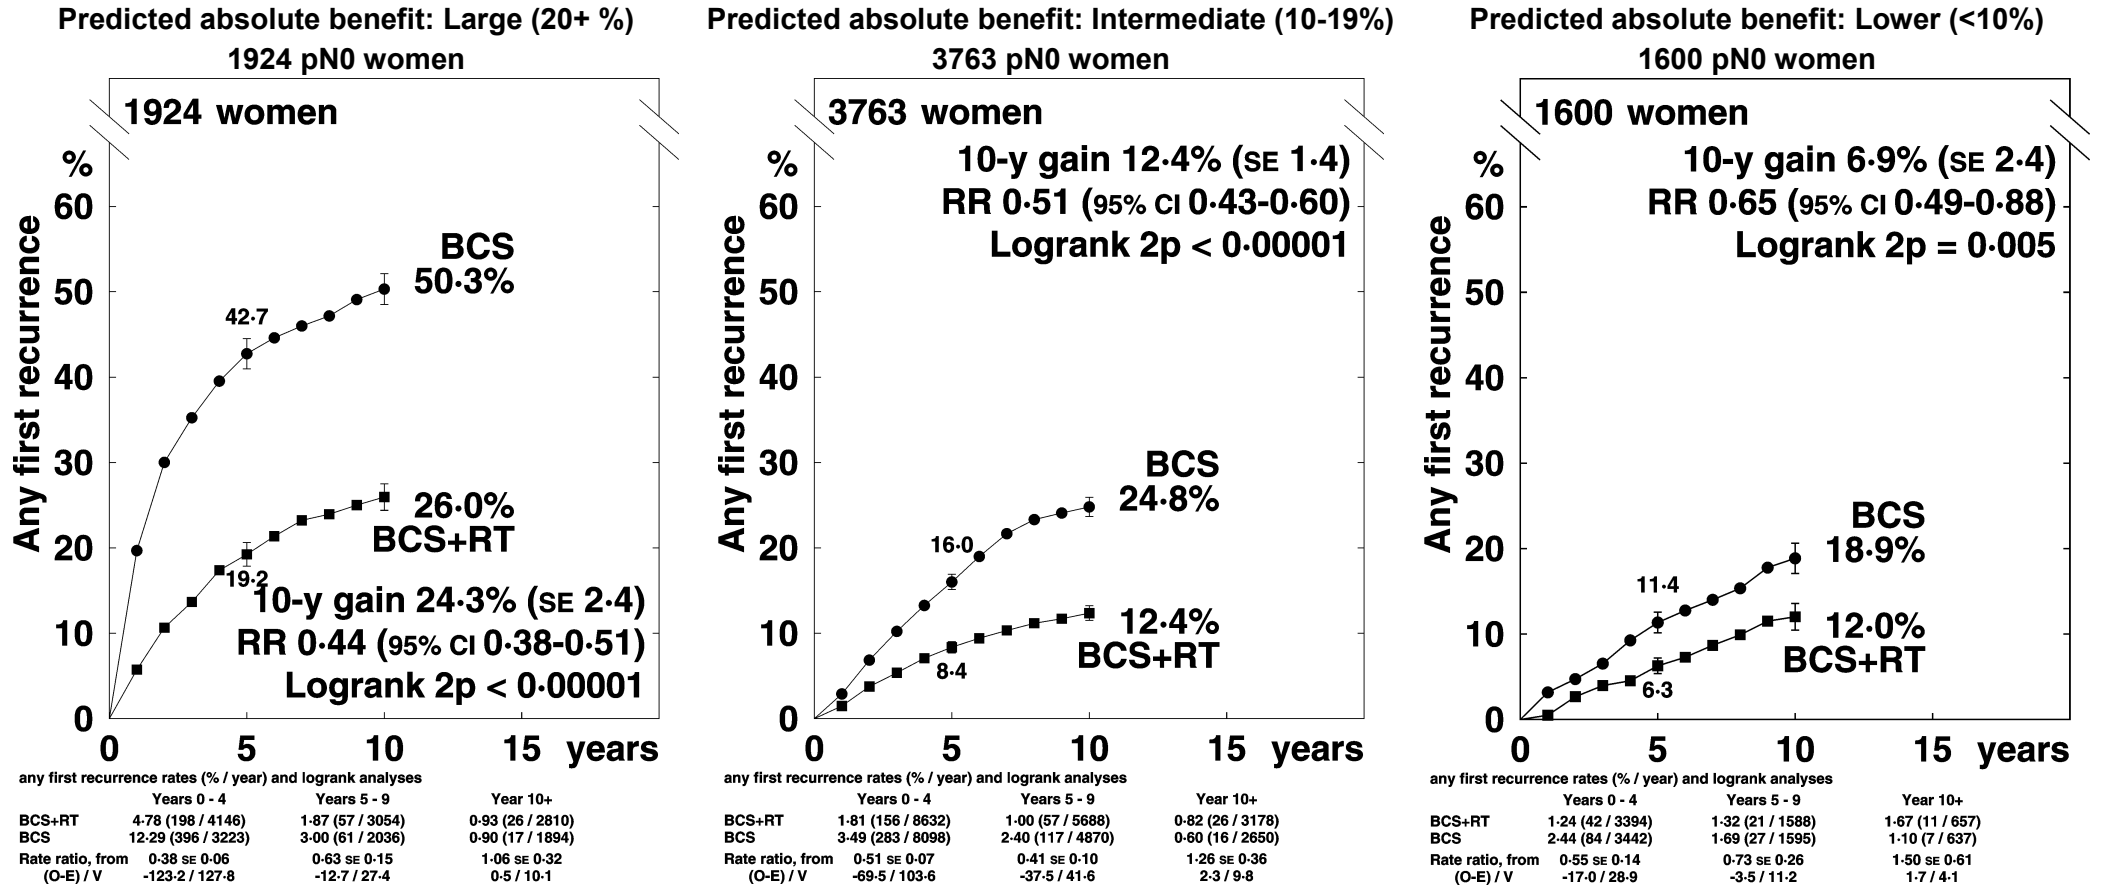

**Webfigure 9b. Risks of breast cancer mortality in 7287 pathologically node-negative women given breast-conserving surgery (BCS) according to predicted absolute benefit with radiotherapy (RT) in 10-year risk suggested by modelling of prognostic and other factors.** Women allocated to categories of predicted absolute benefit using the results of the modelling of prognostic and other factors (see main text figure 4). Risks calculated directly from data on individual women. Vertical lines indicate 1 SE above or below the 5 and 10 year percentages.

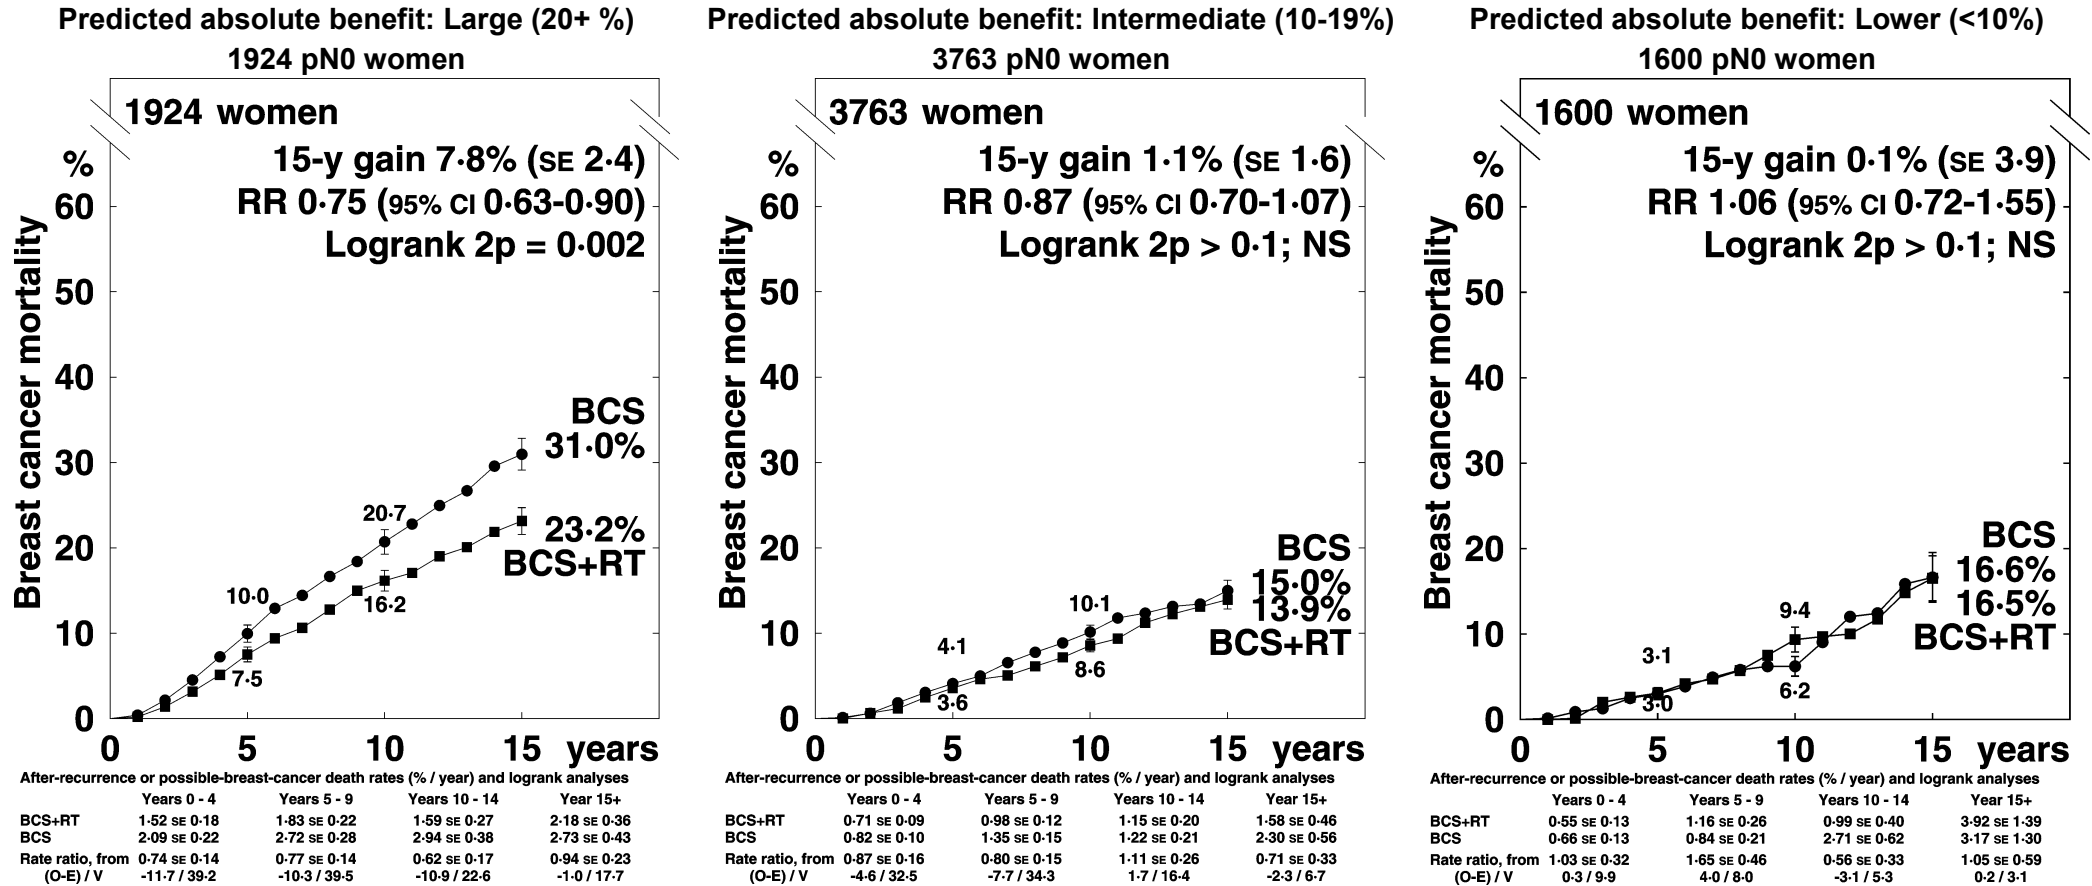

**Webfigure 9c. 10-year risk of any first recurrence in 7287 pathologically node-negative women in trials of radiotherapy (RT) after breast-conserving surgery (BCS) according to predicted absolute benefit with radiotherapy in 10-year risk suggested by modelling of prognostic and other factors, type of first recurrence and allocated treatment.** Women found to have both a locoregional and a distant recurrence at the time of their first recurrence are classified as having a distant recurrence. This figure does not provide evidence that radiotherapy increases the risk of distant recurrence, see legend on webappendix p9. Women allocated to categories of predicted absolute benefit using the results of the modelling of prognostic and other factors (see main text figure 4). Risks calculated directly from data on individual women.

**Predicted absolute benefit: Large (20+ %)  
1924 pN0 women**

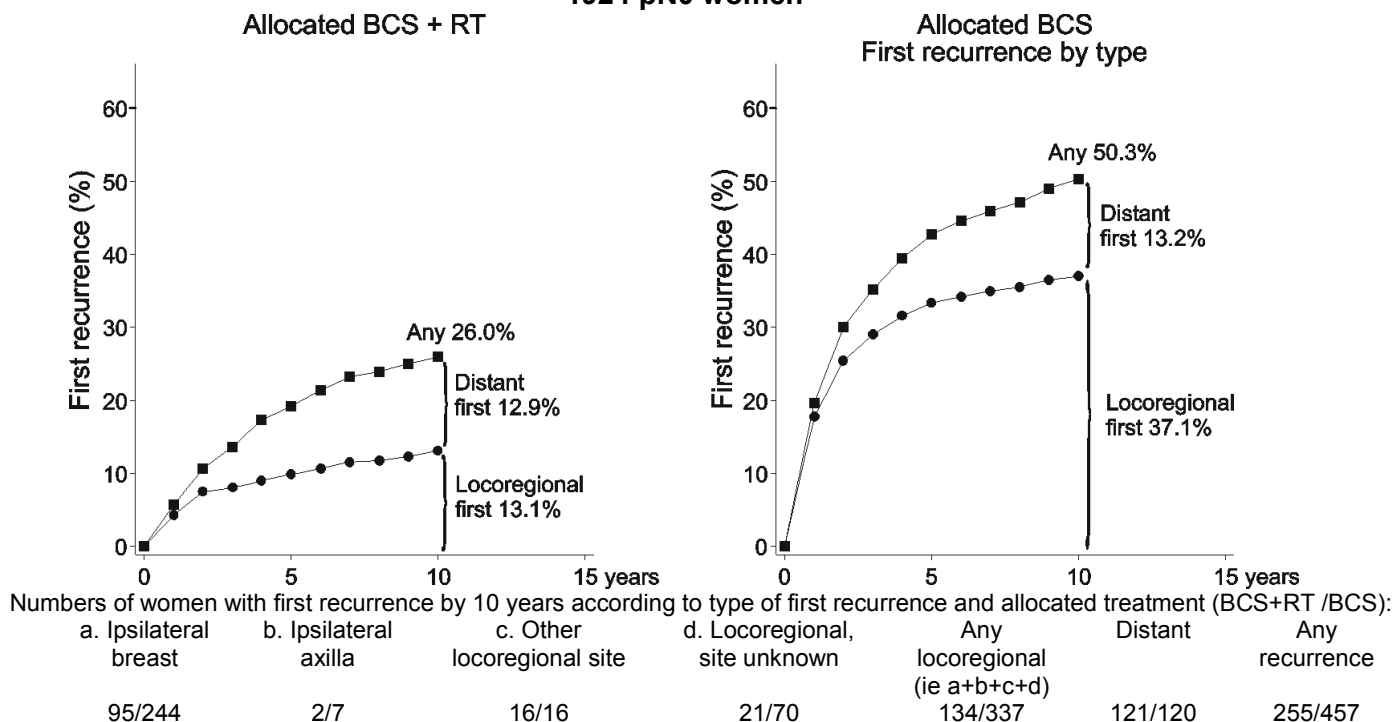

**Predicted absolute benefit: Intermediate (10-19%)  
3763 pN0 women**

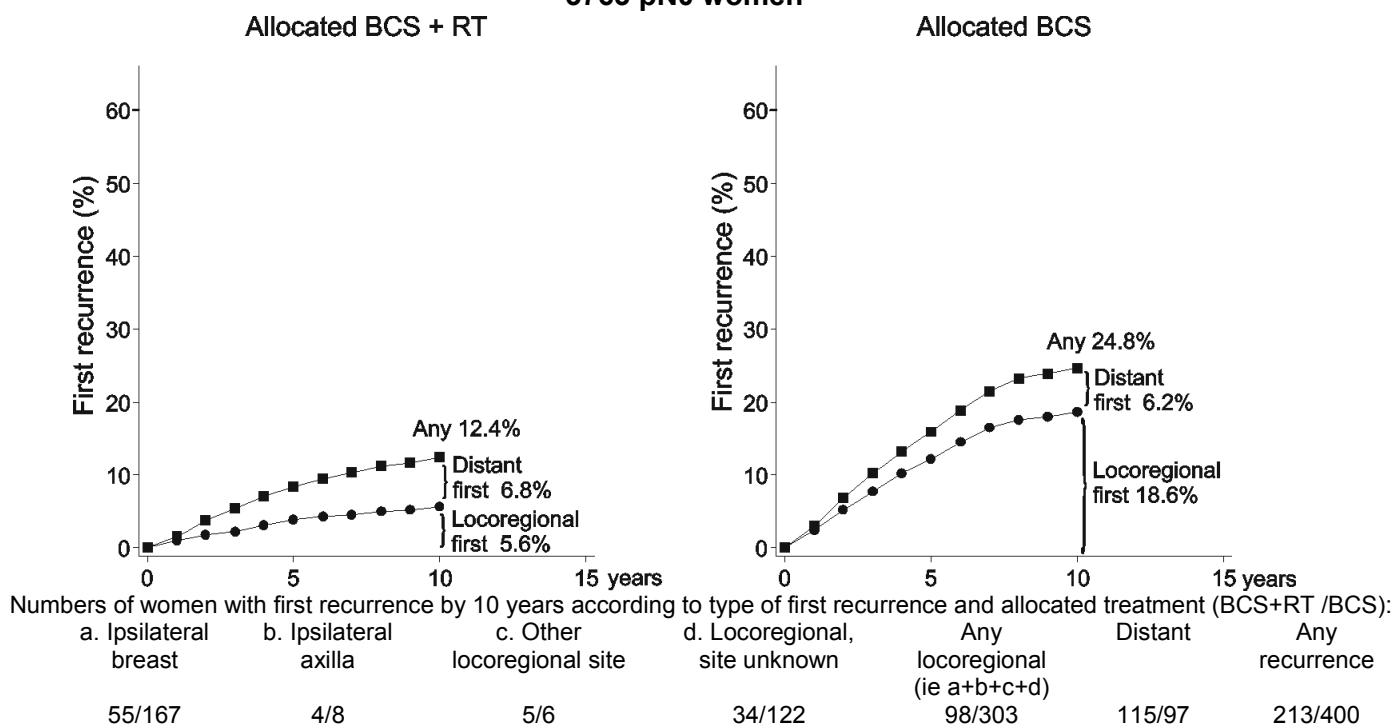

**continued overleaf**

Webfigure 9c, continued.

Predicted absolute benefit: Lower (<10%)

1600 pN0 women

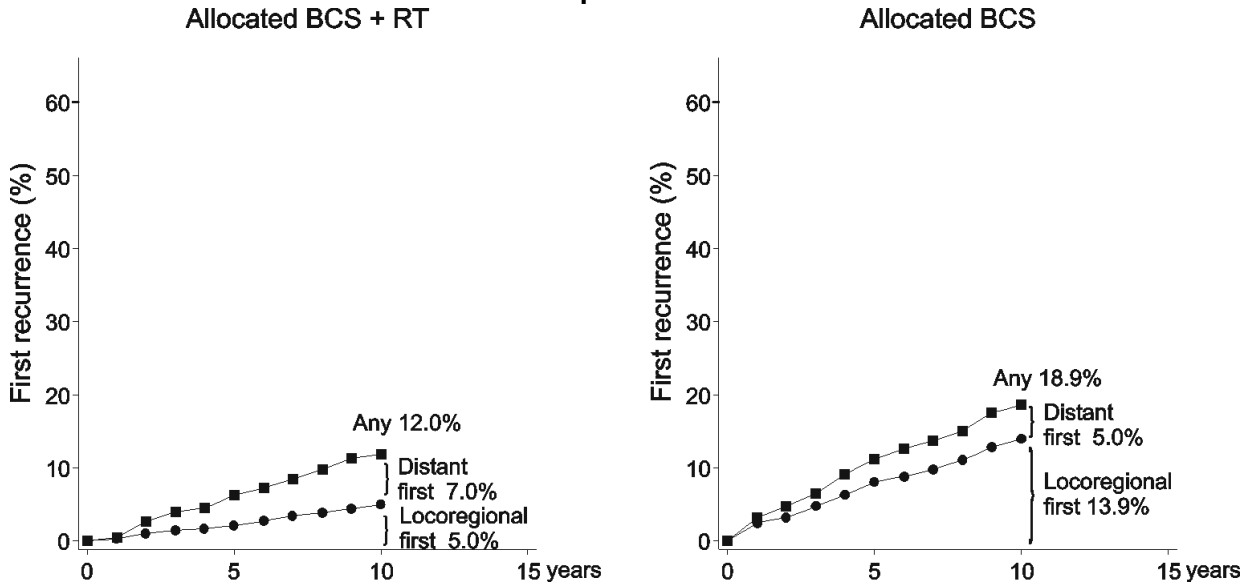

Numbers of women with first recurrence by 10 years according to type of first recurrence and allocated treatment (BCS+RT /BCS):

| a. Ipsilateral breast | b. Ipsilateral axilla | c. Other locoregional site | d. Locoregional, site unknown | Any locoregional (ie a+b+c+d) | Distant | Any recurrence |
|-----------------------|-----------------------|----------------------------|-------------------------------|-------------------------------|---------|----------------|
| 14/40                 | 0/0                   | 2/3                        | 9/37                          | 25/80                         | 38/31   | 63/111         |



**Webfigure 10. Proportional effect of radiotherapy (RT) after breast-conserving surgery (BCS). Event rate ratios for any (locoregional or distant) first recurrence, during years 0-9, and for breast cancer mortality in women with pathologically node-positive disease by prognostic and other factors.**

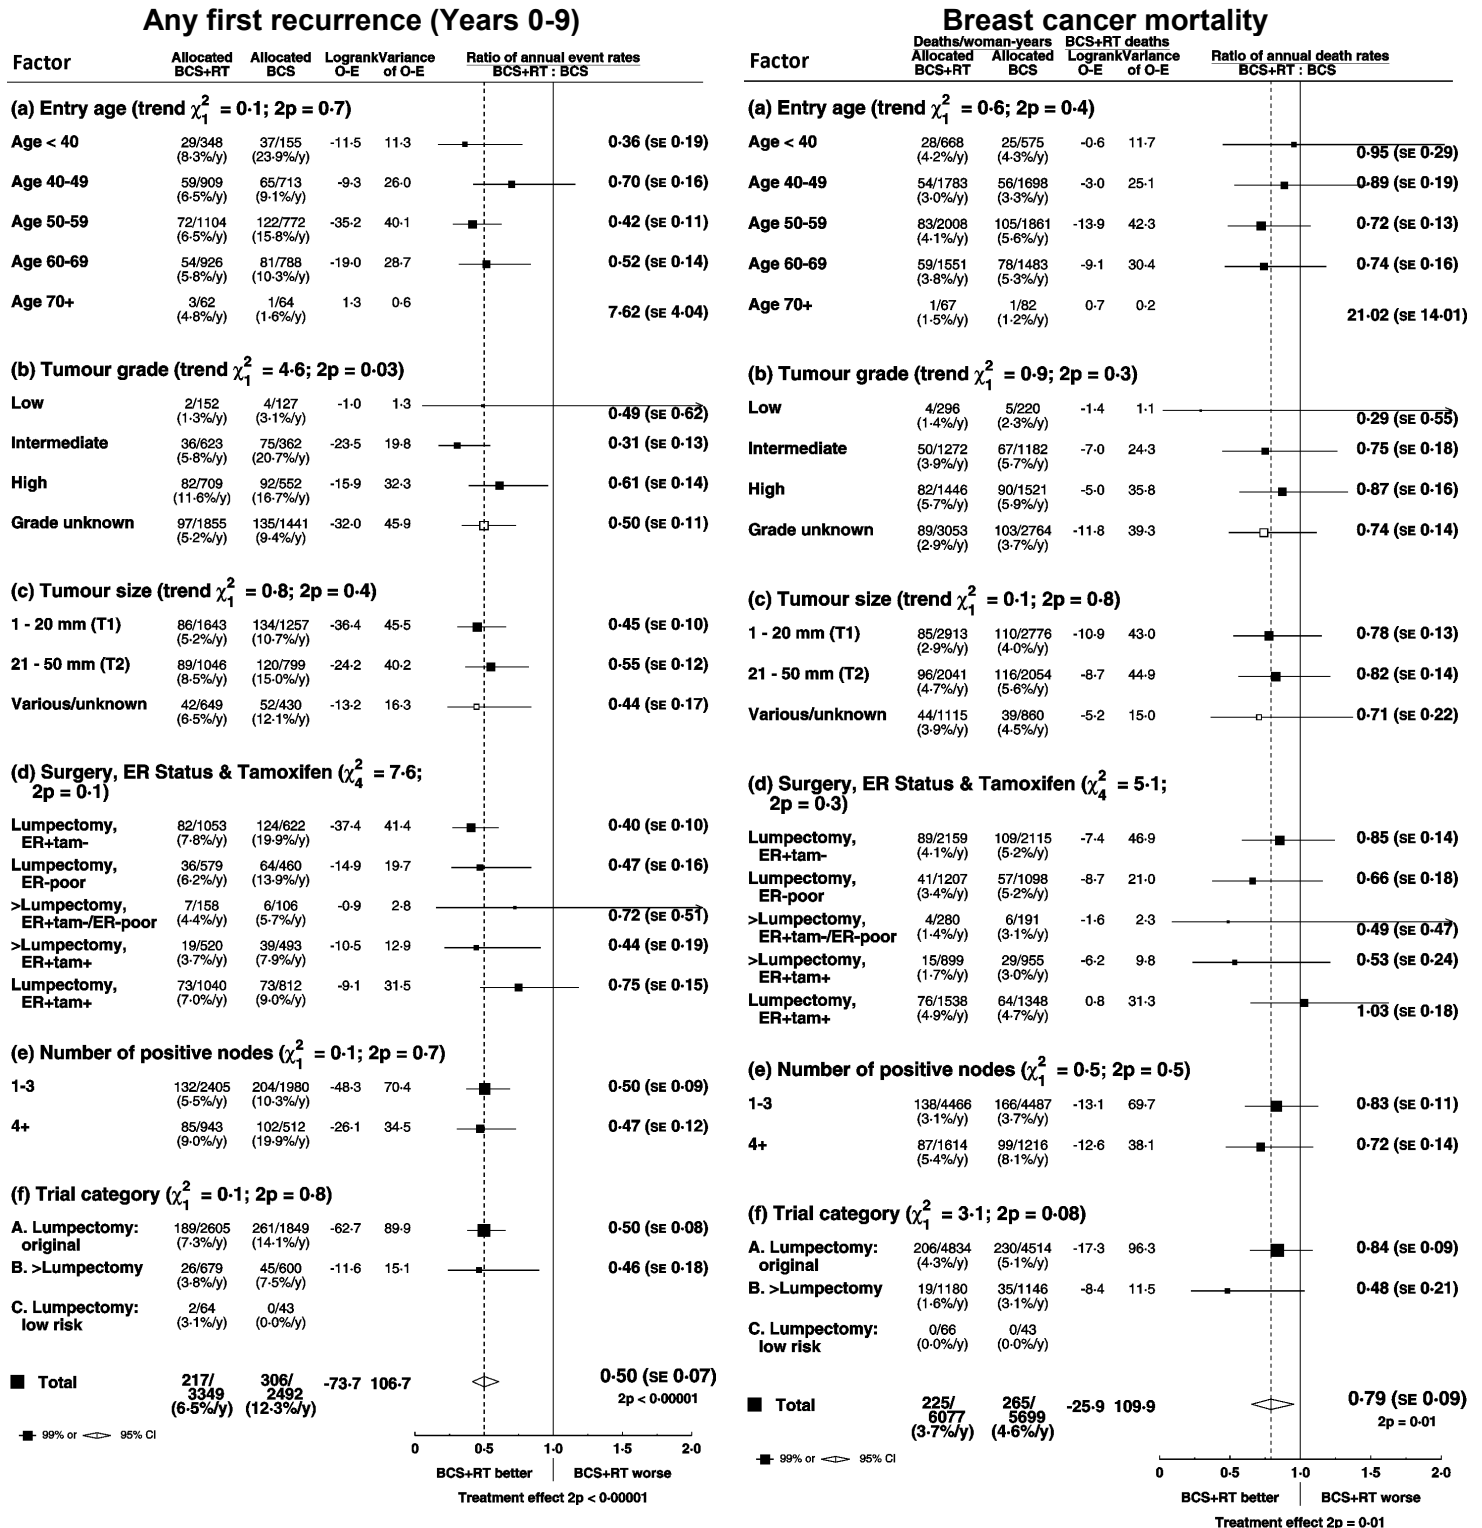

Categories including unknowns excluded from tests for trend and heterogeneity.

See Table 1 in main paper for definitions of trial categories.

**Webtable 7a. Effect of radiotherapy (RT) after breast-conserving surgery (BCS) on 10-year risk (%) of first recurrence of any type (locoregional or distant) in 1050 pathologically node-positive women according to prognostic and other factors.**

| Factor*                                                 | Events/woman-year in years 0-9<br>(10-year risk) |      |               |      | Test for trend or<br>heterogeneity‡ |                                    |
|---------------------------------------------------------|--------------------------------------------------|------|---------------|------|-------------------------------------|------------------------------------|
|                                                         | Allocated BCS+RT                                 |      | Allocated BCS |      | Unadjusted§                         | Adjusted¶                          |
| <b>Age at entry (years)</b>                             |                                                  |      |               |      |                                     |                                    |
| < 40                                                    | 29/349                                           | 49.5 | 37/156        | 76.3 | $X^2_1=3.8,$<br>2p=0.05             | $X^2_1=0.3,$<br>2p =0.56           |
| 40 – 49                                                 | 58/906                                           | 44.7 | 65/715        | 53.7 |                                     |                                    |
| 50 – 59                                                 | 72/1108                                          | 43.2 | 122/776       | 70.7 |                                     |                                    |
| 60+                                                     | 57/992                                           | 40.6 | 82/858        | 57.7 |                                     |                                    |
| <b>Tumour grade</b>                                     |                                                  |      |               |      |                                     |                                    |
| Low/ Intermediate                                       | 38/782                                           | 35.6 | 79/497        | 69.2 | $X^2_1=2.2,$<br>2p=0.14             | $X^2_1=3.3$<br>2p =0.07            |
| High                                                    | 82/713                                           | 63.4 | 92/555        | 71.8 |                                     |                                    |
| Unknown**                                               | 96/1860                                          | 37.5 | 135/1454      | 57.5 |                                     |                                    |
| <b>Tumour size</b>                                      |                                                  |      |               |      |                                     |                                    |
| T1 (1-20 mm)                                            | 86/1652                                          | 38.4 | 134/1264      | 60.2 | $X^2_1=0.0,$<br>2p=0.94             | $X^2_1=1.1,$<br>2p=0.30            |
| T2 (21-50 mm)                                           | 89/1053                                          | 51.8 | 120/805       | 68.6 |                                     |                                    |
| Other/unknown**                                         | 41/651                                           | 39.6 | 52/438        | 66.3 |                                     |                                    |
| <b>Number of positive nodes</b>                         |                                                  |      |               |      |                                     |                                    |
| 1-3                                                     | 132/2411                                         | 38.3 | 204/1988      | 58.2 | $X^2_1=4.3,$<br>2p=0.04             | $X^2_1=0.6,$<br>2p=0.44            |
| 4+                                                      | 84/944                                           | 54.7 | 102/518       | 76.4 |                                     |                                    |
| <b>ER status &amp; trial policy of tamoxifen use†††</b> |                                                  |      |               |      |                                     |                                    |
| ER-poor                                                 | 43/742                                           | 40.3 | 70/571        | 61.5 | 2p<0.001                            | 2p=0.08                            |
| ER+Tam-                                                 | 82/1054                                          | 49.4 | 124/623       | 73.9 |                                     |                                    |
| ER+Tam+                                                 | 91/1560                                          | 42.2 | 112/1312      | 55.0 |                                     |                                    |
| <b>Trial policy of additional therapy**</b>             |                                                  |      |               |      |                                     |                                    |
| No                                                      | 0/0                                              | -    | 0/0           | -    | -                                   | -                                  |
| Yes                                                     | 112/1925                                         | 41.5 | 147/1556      | 57.6 |                                     |                                    |
| Some/Unknown**                                          | 104/1431                                         | 47.1 | 159/951       | 69.3 |                                     |                                    |
| <b>Trial category§§</b>                                 |                                                  |      |               |      |                                     |                                    |
| A. Lump: original                                       | 188/2609                                         | 46.0 | 261/1861      | 66.7 | A vs B:<br>$X^2_1=3.0,$<br>2p=0.08  | A vs B:<br>$X^2_1=0.6,$<br>2p=0.43 |
| B. >Lump                                                | 26/680                                           | 31.6 | 45/601        | 53.0 |                                     |                                    |
| C. Lump: low risk                                       | 2/66                                             | -    | 0/44          | -    |                                     |                                    |

\* Age at entry, tumour grade, tumour size, and ER status are characteristics of the individual women or their tumours; tamoxifen use, trial policy of additional therapy, and trial category are characteristics of the trials in which they were entered.

‡ Test for trend/heterogeneity in absolute reduction in recurrence rate.

§ Unadjusted: each factor alone.

¶ Adjusted: each factor adjusted for all others using regression modelling as described on webappendix p20.

\*\* Category excluded from test for trend/heterogeneity.

†† Tamoxifen use: tamoxifen given to both trial arms. ER unknown included with ER+.

‡‡ Chemotherapy (usually CMF) given to both trials arms and/or nodal RT or boost given to those allocated BCS+RT.

§§ See table 1 in main paper for explanation of trial.

**Webtable 7b. Effect of radiotherapy (RT) after breast-conserving surgery (BCS) on 5-year risk (%) of first recurrence of any type (locoregional or distant) in 1050 pathologically node-positive women according to prognostic factors.**

| Factor*                                                 | Events/woman-year in years 0-4<br>(5-year risk) |      |               |      | Test for trend or heterogeneity‡ |                          |
|---------------------------------------------------------|-------------------------------------------------|------|---------------|------|----------------------------------|--------------------------|
|                                                         | Allocated BCS+RT                                |      | Allocated BCS |      | Unadjusted§                      | Adjusted¶                |
| <b>Age at entry (years)</b>                             |                                                 |      |               |      |                                  |                          |
| < 40                                                    | 24/213                                          | 39.9 | 36/102        | 72.9 | $X^2_1=7.2,$<br>2p=0.007         | $X^2_1=2.5,$<br>2p =0.11 |
| 40 – 49                                                 | 44/543                                          | 33.2 | 56/415        | 45.3 |                                  |                          |
| 50 – 59                                                 | 53/659                                          | 30.4 | 106/517       | 61.1 |                                  |                          |
| 60+                                                     | 41/603                                          | 27.3 | 65/543        | 44.6 |                                  |                          |
| <b>Tumour grade</b>                                     |                                                 |      |               |      |                                  |                          |
| Low/ Intermediate                                       | 30/457                                          | 27.9 | 72/318        | 61.5 | $X^2_1=1.3,$<br>2p=0.25          | $X^2_1=2.5$<br>2p =0.11  |
| High                                                    | 70/475                                          | 54.2 | 85/341        | 65.1 |                                  |                          |
| Unknown**                                               | 62/1085                                         | 23.0 | 106/918       | 43.9 |                                  |                          |
| <b>Tumour size</b>                                      |                                                 |      |               |      |                                  |                          |
| T1 (1-20 mm)                                            | 52/983                                          | 22.0 | 111/788       | 48.4 | $X^2_1=0.2,$<br>2p=0.64          | $X^2_1=1.7,$<br>2p=0.20  |
| T2 (21-50 mm)                                           | 75/649                                          | 43.1 | 105/505       | 59.9 |                                  |                          |
| Other/unknown**                                         | 35/386                                          | 31.2 | 47/284        | 59.8 |                                  |                          |
| <b>Number of positive nodes</b>                         |                                                 |      |               |      |                                  |                          |
| 1-3                                                     | 101/1415                                        | 28.6 | 174/1206      | 49.2 | $X^2_1=4.2,$<br>2p=0.04          | $X^2_1=1.2,$<br>2p=0.27  |
| 4+                                                      | 61/603                                          | 37.1 | 89/371        | 64.4 |                                  |                          |
| <b>ER status &amp; trial policy of tamoxifen use†††</b> |                                                 |      |               |      |                                  |                          |
| ER-poor                                                 | 36/434                                          | 33.6 | 62/357        | 54.0 | 2p<0.001                         | 2p=0.05                  |
| ER+Tam-                                                 | 64/663                                          | 37.7 | 114/402       | 66.9 |                                  |                          |
| ER+Tam+                                                 | 62/921                                          | 27.3 | 87/819        | 41.9 |                                  |                          |
| <b>Trial policy of additional therapy**</b>             |                                                 |      |               |      |                                  |                          |
| No                                                      | 0/0                                             | -    | 0/0           | -    | -                                | -                        |
| Yes                                                     | 77/1134                                         | 27.0 | 118/986       | 45.5 |                                  |                          |
| Some/Unknown**                                          | 85/884                                          | 38.4 | 145/591       | 62.4 |                                  |                          |
| <b>Trial category§§</b>                                 |                                                 |      |               |      |                                  |                          |
| A. Lump: original                                       | 151/1593                                        | 36.3 | 233/1182      | 58.5 | A vs B:<br>$X^2_1=3.2$           | A vs B:<br>$X^2_1=1.6,$  |
| B. >Lump                                                | 11/380                                          | 13.2 | 30/365        | 34.8 | 2p=0.07                          | 2p=0.21                  |
| C. Lump: low risk                                       | 0/45                                            | -    | 0/30          | -    |                                  |                          |

\* Age at entry, tumour grade, tumour size, and ER status are characteristics of the individual women or their tumours; tamoxifen use, Trial policy of additional therapy, and trial category are characteristics of the trials in which they were entered.

‡ Test for trend/heterogeneity in absolute reduction in recurrence rate.

§ Unadjusted: each factor alone.

¶ Adjusted: each factor adjusted for all others using regression modelling as described on webappendix p20.

\*\* Category excluded from test for trend/heterogeneity.

†† Tamoxifen use: tamoxifen given to both trial arms. ER unknown included with ER+.

‡‡ Chemotherapy (usually CMF) given to both trials arms and/or nodal RT or boost given to those allocated BCS+RT.

§§ See table 1 in main paper for explanation of trial categories.

**Webfigure 11a. Effect of radiotherapy (RT) after breast-conserving surgery (BCS) in pathologically node-positive women — 10-year risks of any (locoregional or distant) first recurrence by number of positive axillary nodes.** Vertical lines indicate 1 SE above or below the 5 and 10 year percentages.

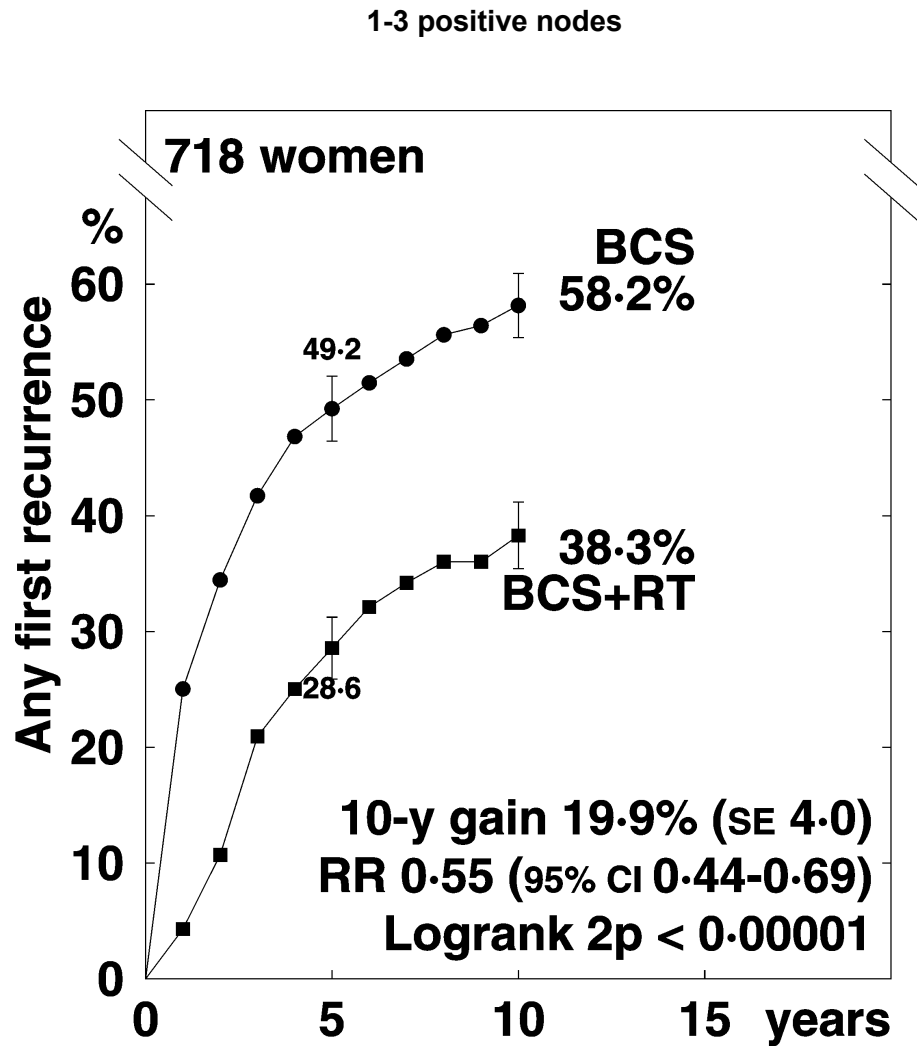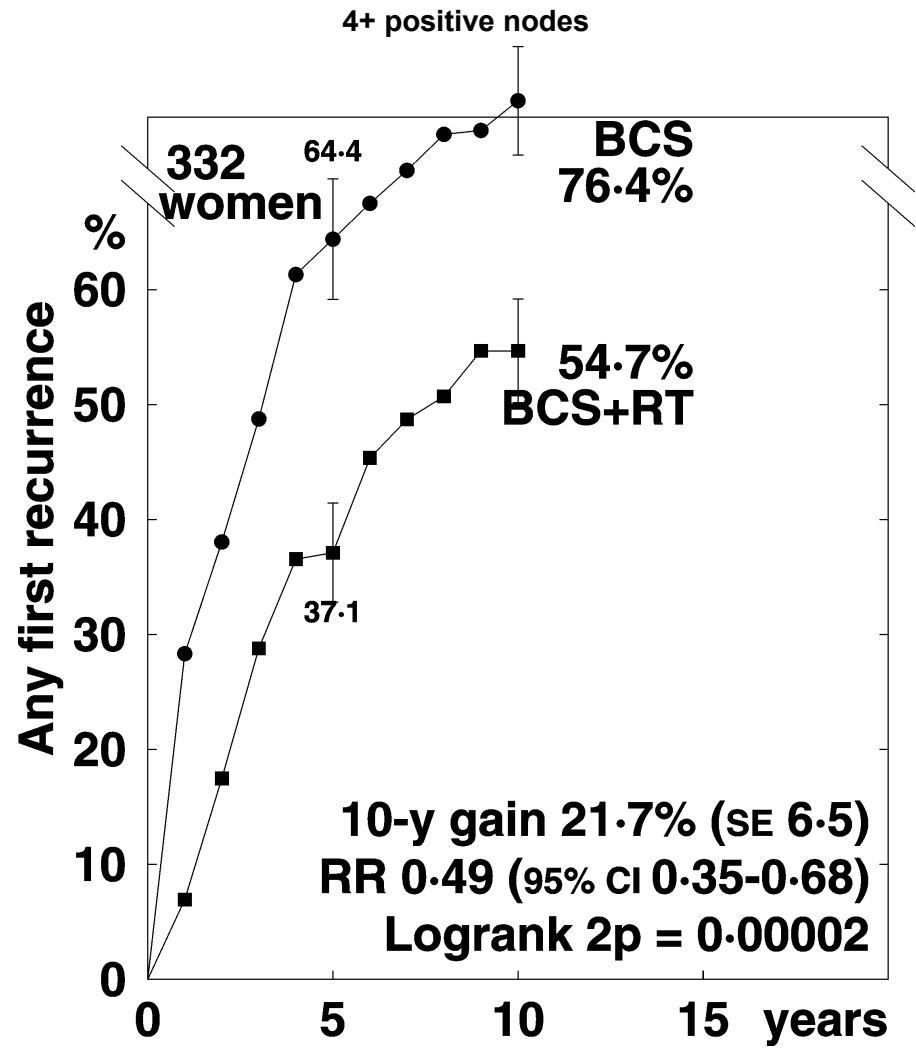

Webfigure 11b. Effect of radiotherapy (RT) after breast-conserving surgery (BCS) in pathologically node-positive women — 10-year risks of any (locoregional or distant) first recurrence by ER status and tamoxifen use. Vertical lines indicate 1 SE above or below the 5 and 10 year percentages.

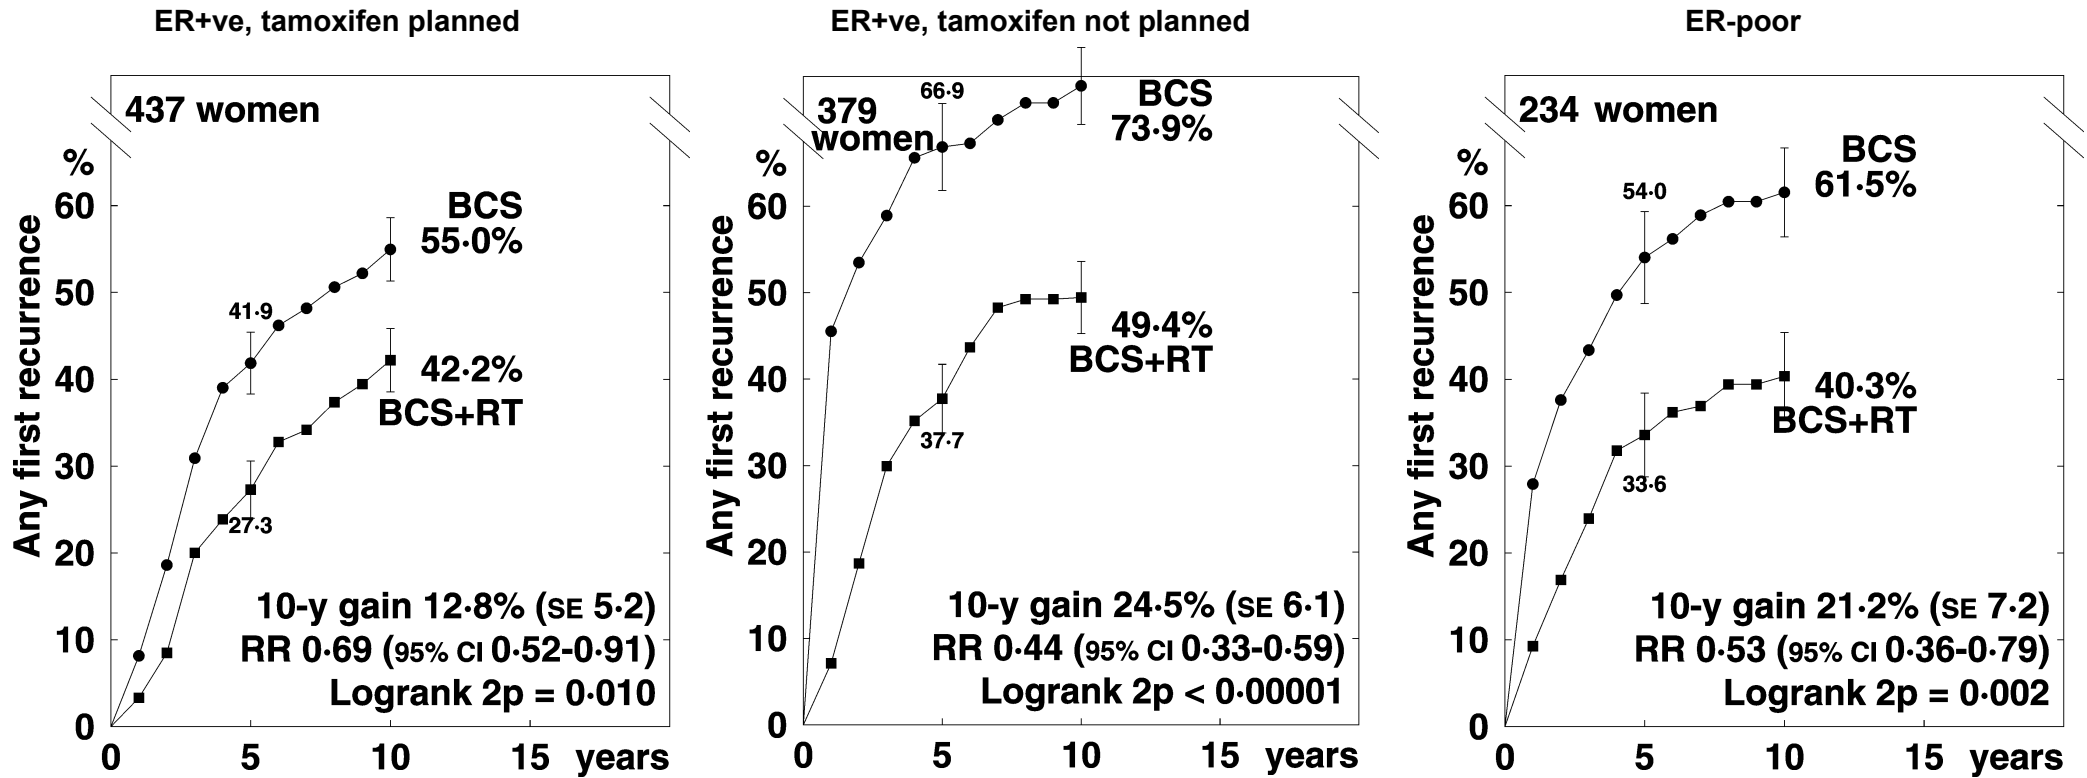

**Webfigure 12a. Effect of radiotherapy after breast-conserving surgery on any (locoregional or distant) first recurrence, breast cancer mortality and all-cause mortality in 7287 women with pathologically node-negative disease. Event rate ratios, one line per trial.**

**Any first recurrence**

**Breast cancer mortality**

**Any death**

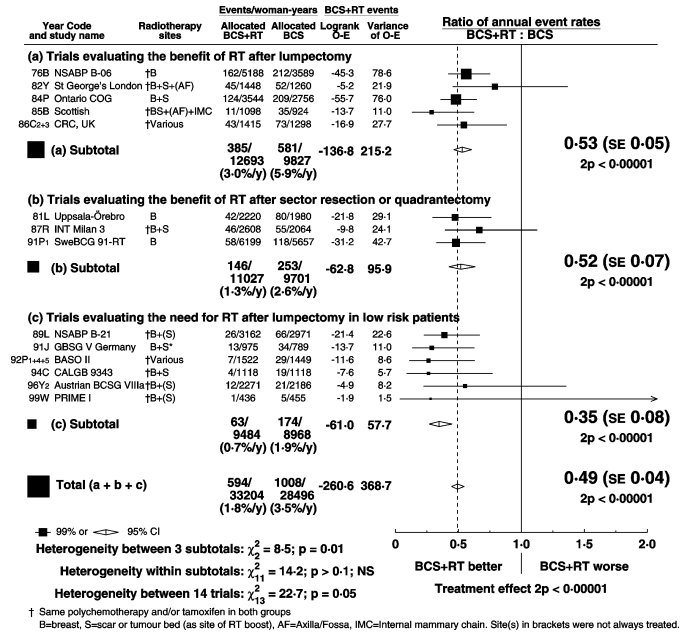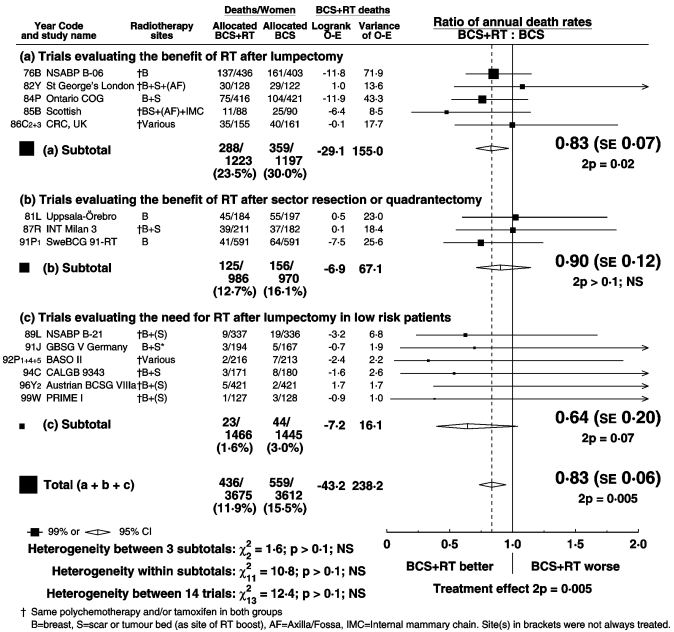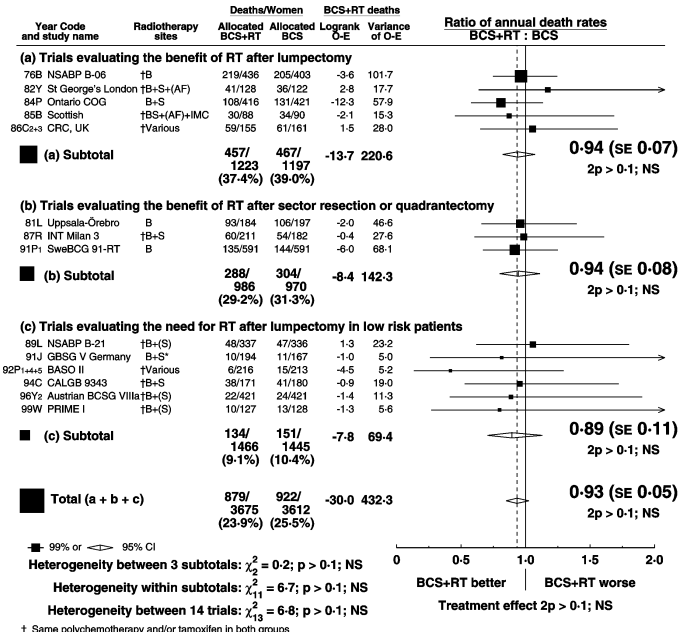

**Webfigure 12b. Effect of radiotherapy after breast-conserving surgery on any (locoregional or distant) first recurrence, breast cancer mortality and all-cause mortality in 1050 women with pathologically node-positive disease. Event rate ratios, one line per trial.**

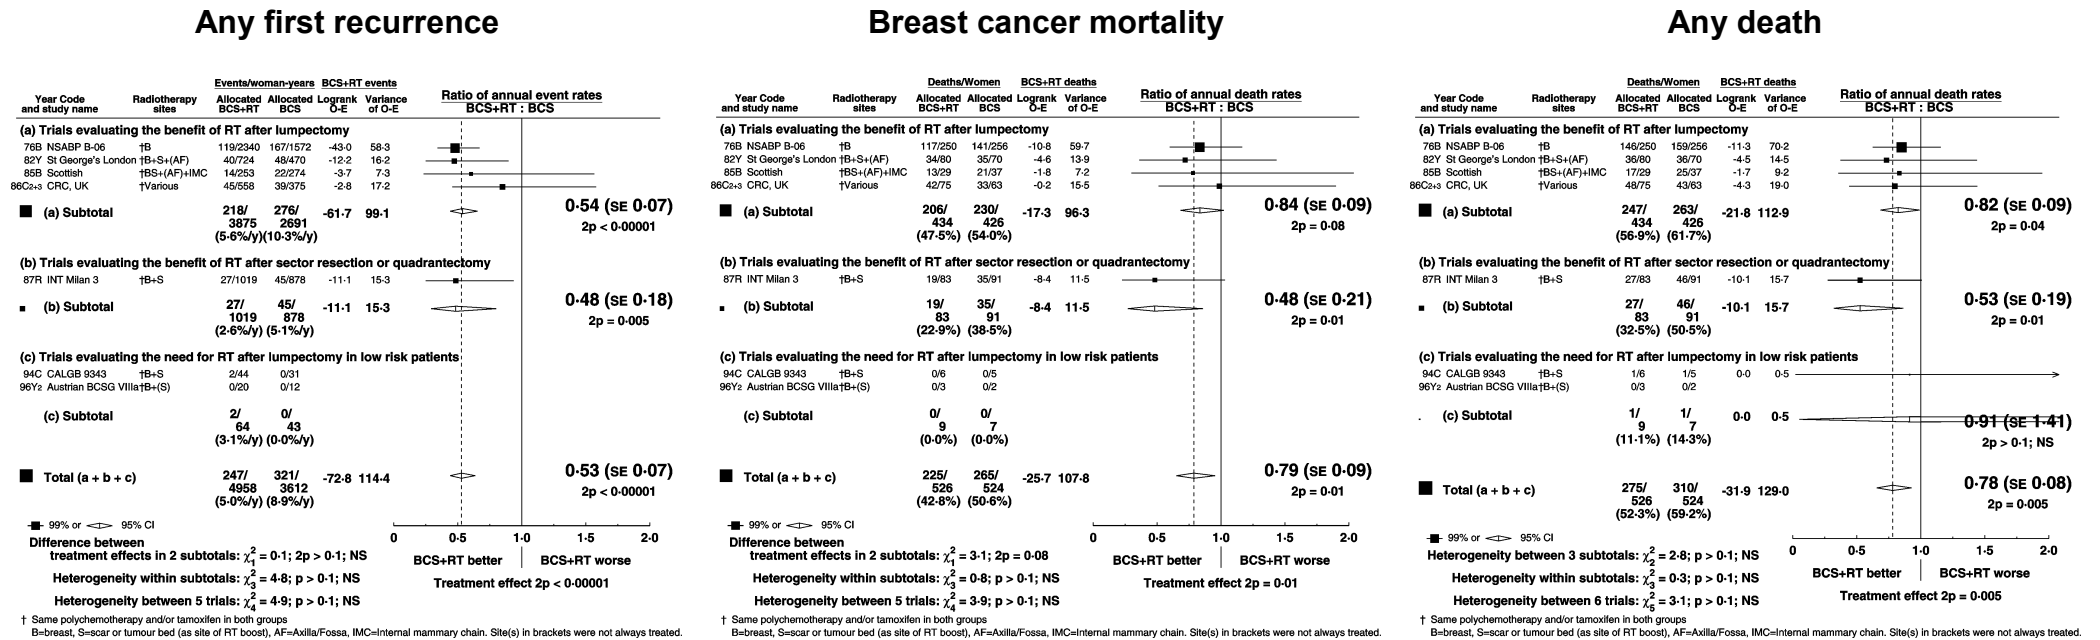

Webfigure 12c. Effect of radiotherapy after breast-conserving surgery on any (locoregional or distant) first recurrence, breast cancer mortality and all-cause mortality in 2464 women with unknown pathological nodal status disease. Event rate ratios, one line per trial.

### Any first recurrence

### Breast cancer mortality

### Any death

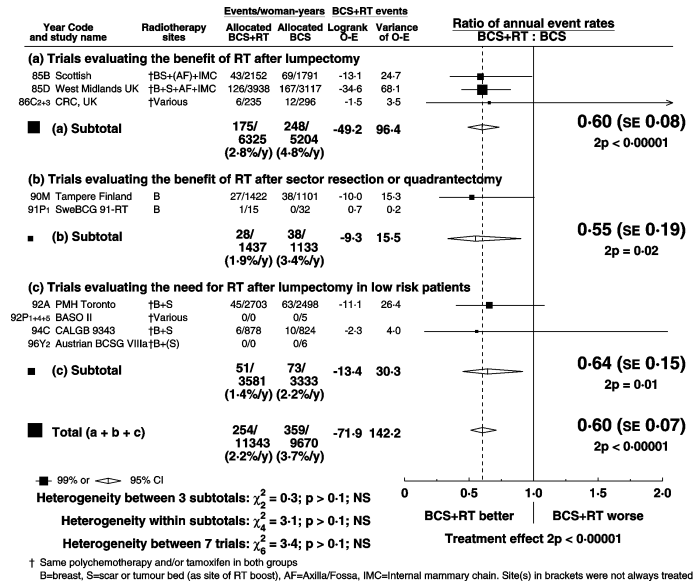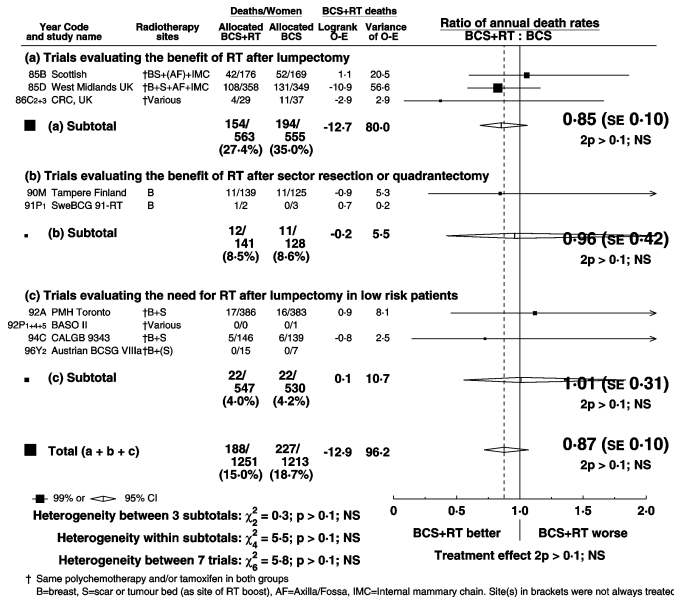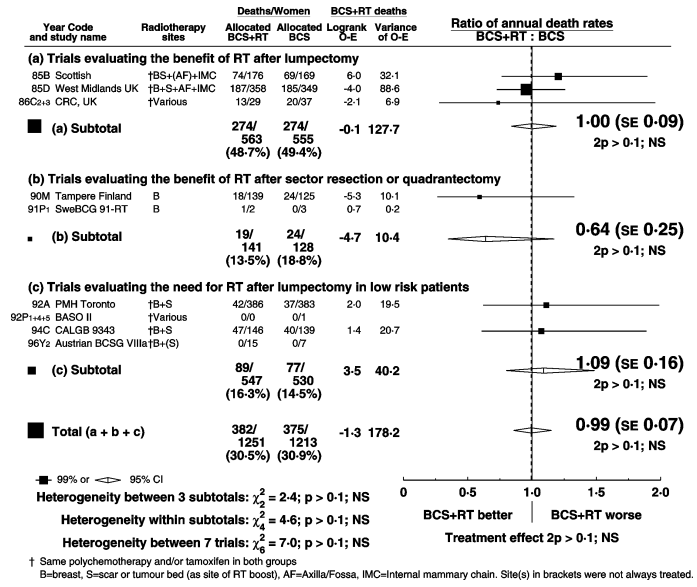



**Webfigure 13. EBCTCG collaborators, listed alphabetically by institution and then alphabetically by name.**

*ACETBC, Tokyo, Japan*—O Abe, R Abe, K Enomoto, K Kikuchi, H Koyama, H Masuda, Y Nomura, Y Ohashi, K Sakai, K Sugimachi, M Toi, T Tominaga, J Uchino, M Yoshida.  
*Addenbrooke's Hospital, Cambridge, UK*—J L Haybittle.  
*Anglo-Celtic Cooperative Oncology Group, UK*—C F Leonard.  
*ARCOSEIN Group, France*—G Calais, P Geraud.  
*ATLAS Trial Collaborative Study Group, Oxford, UK*—V Collett, C Davies, A Delmestri, J Sayer.  
*Auckland Breast Cancer Study Group, New Zealand*—V J Harvey, I M Holdaway, R G Kay, B H Mason.  
*Australian New Zealand Breast Cancer Trials Group, Sydney, Australia*—J F Forbes, N Wilcken.  
*Austrian Breast Cancer Study Group, Vienna, Austria*—R Bartsch, P Dubsky, C Fesl, H Fohler, M Gnant, R Greil, R Jakesz, A Lang, G Luschin-Ebengreuth, C Marth, B Mlineritsch, H Samonigg, C F Singer, G G Steger, H Stöger.  
*Beatson Oncology Centre, Glasgow, UK*—P Canney, H M A Yosef.  
*Belgian Adjuvant Breast Cancer Project, Liège, Belgium*—C Focan.  
*Berlin-Buch Akademie der Wissenschaften, Germany*—U Peek.  
*Birmingham General Hospital, UK*—G D Oates, J Powell.  
*Bordeaux Institut Bergonié, France*—M Durand, L Mauriac.  
*Bordet Institute, Brussels, Belgium*—A Di Leo, S Dolci, D Larsimont, J M Nogaret, C Philippson, M J Piccart.  
*Bradford Royal Infirmary, UK*—M B Masood, D Parker, J J Price.  
*Breast Cancer International Research Group (BCIRG)*—M A Lindsay, J Mackey, M Martin.  
*Breast Cancer Study Group of the Comprehensive Cancer Centre, Limburg, Netherlands*—P S G J Hupperets.  
*British Association of Surgical Oncology BASO II Trialists, London, UK*—T Bates, R W Blamey, U Chetty, I O Ellis, E Mallon, D A L Morgan, J Patnick, S Pinder.  
*British Columbia Cancer Agency, Vancouver, Canada*—I Olivotto, J Ragaz.  
*Cancer and Leukemia Group B, Washington DC, USA*—D Berry, G Broadwater, C Cirrincione, H Muss, L Norton, R B Weiss.  
*Cancer Care Ontario, Canada*—H T Abu-Zahra.  
*Cancer Research Centre of the Russian Academy of Medical Sciences, Moscow, Russia*—S M Portnoj.  
*Cancer Research UK Clinical Trials Unit (CRCTU), NCRI, Birmingham, UK*—S Bowden, C Brookes, J Dunn, I Fernando, M Lee, C Poole, D Rea, D Spooner.  
*Cardiff Trialists Group, UK*—P J Barrett-Lee, R E Mansel, I J Monypenny.  
*Case Western Reserve University, Cleveland, OH, USA*—N H Gordon.  
*Central Oncology Group, Milwaukee, WI, USA*—H L Davis.  
*Centre for Cancer Prevention, Wolfson Institute of Preventive Medicine, Queen Mary, University of London, UK*—J Cuzick.  
*Centre Léon-Bérard, Lyon, France*—Y Lehingue, P Romestaing.  
*Centre Paul Lamarque, Montpellier, France*—J B Dubois.  
*Centre Régional François Baclesse, Caen, France*—T Delozier, B Griffon, J Mace Leseq'h.  
*Centre René Huguenin, Paris, St Cloud, France*—P Rambert.  
*Centro Oncologico, Trieste, Italy*—G Mustacchi.  
*Charles University in Prague, First Faculty of Medicine, Department of Oncology of the First Faculty of Medicine and General Teaching Hospital, Czech Republic*—Petruzelka, O Pribylova.  
*Cheltenham General Hospital, UK*—J R Owen.

*Chemo N0 Trial Group, Germany*—N Harbeck, F Jänicke, C Meisner, M Schmitt, C Thomssen.  
*Chicago University, IL, USA*—P Meier.  
*Chinese Academy of Medical Sciences, Beijing, People's Republic of China (in collaboration with the Oxford CTSU)*—Y Shan, Y F Shao, X Wang, D B Zhao (CTSUs: Z M Chen, H C Pan).  
*Christie Hospital and Holt Radium Institute, Manchester, UK*—A Howell, R Swindell.  
*Clinical Trial Service Unit, Oxford, UK (ie, EBCTCG Secretariat)*—J A Burrett, M Clarke, R Collins, C Correa, D Cutter, S Darby, C Davies, K Davies, A Delmestri, P Elphinstone, V Evans, L Gettins, J Godwin, R Gray, C Gregory, D Hermans, C Hicks, S James, A Kerr, E MacKinnon, M Lay, P McGale, T McHugh, R Peto, J Sayer, C Taylor, Y Wang.  
*Coimbra Instituto de Oncologia, Portugal*—J Albano, C F de Oliveira, H Gervásio, J Gordilho.  
*Copenhagen Radium Centre, Denmark*—H Johansen, H T Mouridsen.  
*Dana-Farber Cancer Institute, Boston, MA, USA*—R S Gelman, J R Harris, D Hayes, C Henderson, C L Shapiro, E Winer.  
*Danish Breast Cancer Cooperative Group, Copenhagen, Denmark*—P Christiansen, B Ejlersen, M Ewertz, M-B Jensen, S Møller, H T Mouridsen.  
*Danish Cancer Registry, Copenhagen, Denmark*—B Carstensen, T Palshof.  
*Düsseldorf University, Germany*—H J Trampisch.  
*Dutch Working Party for Autologous Bone Marrow Transplant in Solid Tumours, Amsterdam & Groningen, Netherlands*—O Dalesio, E G E de Vries, S Rodenhuis, H van Tinteren.  
*Eastern Cooperative Oncology Group, Boston, MA, USA*—R L Comis, N E Davidson, R Gray, N Robert, G Sledge, L J Solin, J A Sparano, D C Tormey, W Wood.  
*Edinburgh Breast Unit, UK*—D Cameron, U Chetty, J M Dixon, P Forrest, W Jack, I Kunkler.  
*Elim Hospital, Hamburg, Germany*—J Rossbach.  
*Erasmus MC/Daniel den Hoed Cancer Center, Rotterdam, Netherlands*—J G M Klijn, A D Treurniet-Donker, W L J van Putten.  
*European Institute of Oncology, Milan, Italy*—N Rotmensz, U Veronesi, G Viale.  
*European Organization for Research and Treatment of Cancer, Brussels, Belgium*—H Bartelink, N Bijker, J Bogaerts, F Cardoso, T Cufer, J P Julien, E Rutgers, C J H van de Velde.  
*Evanston Hospital, IL, USA*—M P Cunningham.  
*Finnish Breast Cancer Group, Finland*—R Huovinen, H Joensuu.  
*Fondazione Maugeri Pavia, Italy*—A Costa, C Tinterri.  
*Fondazione Michelangelo, Milan, Italy*—G Bonadonna, L Gianni, P Valagussa.  
*Fox Chase Cancer Center, Philadelphia, PA, USA*—L J Goldstein.  
*French Adjuvant Study Group (GFEA), Guyancourt, France*—J Bonnetterre, P Fargeot, P Fumoleau, P Kerbrat, E Luporsi, M Namer.  
*German Adjuvant Breast Group (GABG), Frankfurt, Germany*—W Eiermann, J Hilfrich, W Jonat, M Kaufmann, R Kreienberg, M Schumacher.  
*German Breast Cancer Study Group (BMFT), Freiburg, Germany*—G Bastert, H Rauschecker, R Sauer, W Sauerbrei, A Schauer, M Schumacher.  
*German Breast Group (GBG), Neu-Isenburg, Germany*—J U Blohmer, S D Costa, H Eidtmann, B Gerber, C Jackisch, S Loibl, G von Minckwitz.  
*Ghent University Hospital, Belgium*—A de Schryver, L Vakaet.  
*GIVIO Interdisciplinary Group for Cancer Care Evaluation, Chieti, Italy*—M Belfiglio, A Nicolucci, F Pellegrini, M C Pirozzoli, M Sacco, M Valentini.  
*Glasgow Victoria Infirmary, UK*—C S McArdle, D C Smith, S Stallard.  
*Groote Schuur Hospital, Cape Town, South Africa*—D M Dent, C A Gudgeon, A Hacking, E Murray, E Panieri, ID Werner.  
*Grupo Español de Investigación en Cáncer de Mama (GEICAM), Spain*—E Carrasco, M Martin, M A Segui.  
*Gruppo Oncologico Clinico Cooperativo del Nord Est, Aviano, Italy*—E Galligioni.

*Gruppo Oncologico Dell'Italia Meridionale (GOIM), Rome, Italy—M Lopez.*  
*Guadalajara Hospital de 20 Noviembre, Mexico—A Erazo, J Y Medina.*  
*Gunma University, Japan—J Horiguchi, H Takei.*  
*Guy's Hospital, London, UK—I S Fentiman, J L Hayward, R D Rubens, D Skilton.*  
*Heidelberg University I, Germany—H Scheurlen.*  
*Heidelberg University II, Germany—M Kaufmann, H C Sohn.*  
*Helios Klinikum Berlin-Buch, Germany—M Untch.*  
*Hellenic Breast Surgeons Society, Greece—U Dafni, C Markopoulos.*  
*Hellenic Cooperative Oncology Group, Athens, Greece—U Dafni, G Fountzilas.*  
*Hellenic Oncology Research Group, Greece—D Mavroudis.*  
*Helsinki Deaconess Medical Centre, Finland—P Klefstrom.*  
*Helsinki University, Finland—C Blomqvist, T Saarto.*  
*Hospital del Mar, Barcelona, Spain—M Gallen.*  
*Innsbruck University, Austria—R Margreiter.*  
*Institut Claudius Regaud, Toulouse, France—B de Lafontan, J Mihura, H Roché.*  
*Institut Curie, Paris, France—B Asselain, R J Salmon, J R Vilcoq.*  
*Institut Gustave-Roussy, Paris, France—R Arriagada, C Bourcier, C Hill, S Koscielny, A Laplanche, M G Lê, M Spielmann.*  
*Institute of Cancer Research Clinical Trials and Statistics Unit (ICR-CTSU, NCRI), UK—R A'Hern, J Bliss, P Ellis, L Kilburn, J R Yarnold.*  
*Integraal Kankercentrum, Amsterdam, Netherlands—J Benraadt, M Kooi, A O van de Velde, J A van Dongen, J B Vermorcken.*  
*International Breast Cancer Study Group (IBCSG), Bern, Switzerland—M Castiglione, A Coates, M Colleoni, J Collins, J Forbes, R D Gelber, A Goldhirsch, J Lindtner, K N Price, M M Regan, C M Rudenstam, H J Senn, B Thuerlimann.*  
*International Collaborative Cancer Group, Charing Cross Hospital, London, UK—J M Bliss, C E D Chilvers, R C Coombes, E Hall, M Marty.*  
*International Drug Development Institute, Louvain-la-Neuve, Belgium—M Buyse.*  
*International TABLE Study Group, Berlin, Germany—K Possinger, P Schmid, M Untch, D Wallwiener.*  
*ISD Cancer Clinical Trials Team (incorporating the former Scottish Cancer Therapy Network), Edinburgh, UK—L Foster, W D George, H J Stewart, P Stroner.*  
*Israel NSABC, Tel Aviv, Israel—R Borovik, H Hayat, M J Inbar, E Robinson.*  
*Istituto Nazionale per la Ricerca sul Cancro, Genova, Italy—P Bruzzi, L Del Mastro, P Pronzato, M R Sertoli, M Venturini.*  
*Istituto Nazionale per lo Studio e la Cura dei Tumori, Milan, Italy—T Camerini, G De Palo, M G Di Mauro, F Formelli, P Valagussa.*  
*Istituto Oncologico Romagnolo, Forli, Italy—D Amadori.*  
*Italian Cooperative Chemo-Radio-Surgical Group, Bologna, Italy—A Martoni, F Pannuti.*  
*Italian Oncology Group for Clinical Research (GOIRC), Parma, Italy—R Camisa, G Cocconi, A Colozza, R Passalacqua.*  
*Japan Clinical Oncology Group—Breast Cancer Study Group, Matsuyama, Japan—K Aogi, S Takashima.*  
*Japanese Foundation for Multidisciplinary Treatment of Cancer, Tokyo, Japan—O Abe, T Ikeda, K Inokuchi, K Kikuchi, K Sawa.*  
*Kawasaki Medical School, Japan—H Sonoo.*  
*Krakow Institute of Oncology, Poland—S Korzeniowski, J Skolyszewski.*  
*Kumamoto University Group, Japan—M Ogawa, J Yamashita.*  
*Leiden University Medical Center, Netherlands—E Bastiaannet, C J H van de Velde, W van de Water, J G H van Nes.*  
*Leuven Akademisch Ziekenhuis, Gasthuisberg, Belgium—R Christiaens, P Neven, R Paridaens, W Van den Bogaert.*  
*Ludwig-Maximilians University, Munich, Germany—S Braun, W Janni.*

*Marseille Laboratoire de Cancérologie Biologique APM, France*—P Martin, S Romain.  
*Medical University Vienna – General Hospital - Department of Obstetrics and Gynaecology and Department of Medicine I, Vienna, Austria*—M Janauer, M Seifert, P Sevelde, C C Zielinski.  
*Memorial Sloan-Kettering Cancer Center, New York, NY, USA*—T Hakes, C A Hudis, L Norton, R Wittes.  
*Metaxas Memorial Cancer Hospital, Athens, Greece*—G Giokas, D Kondylis, B Lissaios.  
*Mexican National Medical Center, Mexico City, Mexico*—R de la Huerta, M G Sainz.  
*National Cancer Institute, Bethesda, MD, USA*—R Altemus, K Camphausen, K Cowan, D Danforth, A Lichter, M Lippman, J O'Shaughnessy, L J Pierce, S Steinberg, D Venzon, J A Zujewski.  
*National Cancer Institute of Bari, Italy*—C D'Amico, M Lioce, A Paradiso.  
*NCIC Clinical Trials Group, Kingston, Ontario, Canada*—J-A W Chapman, K Gelmon, P E Goss, M N Levine, R Meyer, W Parulekar, J L Pater, K I Pritchard, L E Shepherd, D Tu, T Whelan.  
*National Kyushu Cancer Center, Japan*—Y Nomura, S Ohno.  
*National Surgical Adjuvant Breast and Bowel Project (NSABP), Pittsburgh, PA, USA*—S Anderson, G Bass, A Brown (deceased), J Bryant (deceased), J Costantino, J Dignam, B Fisher, C Geyer, E P Mamounas, S Paik, C Redmond, S Swain, L Wickerham, N Wolmark.  
*Nolvadex Adjuvant Trial Organisation, London, UK*—M Baum, I M Jackson (deceased), M K Palmer.  
*North Central Cancer Treatment Group, Mayo Clinic, Rochester, MN, USA*—E Perez, J N Ingle, V J Suman.  
*North Sweden Breast Cancer Group, Umeå, Sweden*—N O Bengtsson, S Emdin, H Jonsson.  
*North-West Oncology Group (GONO), Italy*—L Del Mastro, M Venturini.  
*North-Western British Surgeons, Manchester, UK*—J P Lythgoe, R Swindell.  
*Northwick Park Hospital, London, UK*—M Kissin.  
*Norwegian Breast Cancer Group, Oslo, Norway*—B Erikstein, E Hannisdal, A B Jacobsen, J E Varhaug.  
*Norwegian Radium Hospital, Oslo, Norway*—B Erikstein, S Gundersen, M Hauer-Jensen, H Høst, A B Jacobsen, R Nissen-Meyer.  
*Nottingham City Hospital, UK*—R W Blamey, A K Mitchell, D A L Morgan, J F R Robertson.  
*Oita Prefectural Hospital, Japan*—H Ueo.  
*Oncofrance, Paris, France*—M Di Palma, G Mathé (deceased), J L Misset.  
*Ontario Clinical Oncology Group, Hamilton, Canada*—M Levine, K I Pritchard, T Whelan.  
*Osaka City University, Japan*—K Morimoto.  
*Osaka National Hospital, Japan*—K Sawa, Y Takatsuka.  
*Oxford Radcliffe Hospitals NHS Trust, Churchill Hospital, Oxford, UK*—E Crossley, A Harris, D Talbot, M Taylor.  
*PACS Adjuvant Study Group, France*—A L Martin, H Roché.  
*Parma Hospital, Italy*—G Cocconi, B di Blasio.  
*Petrov Research Institute of Oncology, St Petersburg, Russia*—V Ivanov, R Paltuev, V Semiglazov.  
*Piedmont Oncology Association, Winston-Salem, NC, USA*—J Brockschmidt, M R Cooper.  
*Pretoria University, South Africa*—C I Falkson.  
*Royal Marsden NHS Trust, London and Sutton, UK*—R A'Hern, S Ashley, M Dowsett, A Makris, T J Powles, I E Smith, J R Yarnold.  
*St George's Hospital, London, UK*—J C Gazet.  
*St George Hospital, Sydney, Australia*—L Browne, P Graham.

*St Luke's Hospital, Dublin, Ireland*—N Corcoran.  
*Sardinia Oncology Hospital A Businico, Cagliari, Sardinia*—N Deshpande, L di Martino.  
*SASIB International Trialists, Cape Town, South Africa*—P Douglas, A Hacking, H Høst, A Lindtner, G Notter.  
*Saskatchewan Cancer Foundation, Regina, Canada*—A J S Bryant, G H Ewing, L A Firth, J L Krushen-Kosloski.  
*Scandinavian Adjuvant Chemotherapy Study Group, Oslo, Norway*—R Nissen-Meyer.  
*South Sweden Breast Cancer Group, Lund, Sweden*—H Anderson, F Killander, P Malmström, L Rydén.  
*South-East Sweden Breast Cancer Group, Linköping, Sweden*—L-G Arnesson, J Carstensen, M Dufmats, H Fohlin, B Nordenskjöld, M Söderberg.  
*South-Eastern Cancer Study Group and Alabama Breast Cancer Project, Birmingham, AL, USA*—J T Carpenter.  
*Southampton Oncology Centre, UK*—N Murray, G T Royle, P D Simmonds.  
*Southwest Oncology Group, San Antonio, TX, USA*—K Albain, W Barlow, J Crowley, D Hayes, J Gralow, S Green, G Hortobagyi, R Livingston, S Martino, C K Osborne, P M Ravdin.  
*Stockholm Breast Cancer Study Group, Sweden*—J Adolfsson, J Bergh, T Bondesson, F Celebioglu, K Dahlberg, T Fornander, I Fredriksson, J Frisell, E Göransson, M Iiristo, U Johansson, E Lenner, L Löfgren, P Nikolaidis, L Perbeck, S Rotstein, K Sandelin, L Skoog, G Svane, E af Trampe, C Wadström.  
*Swiss Group for Clinical Cancer Research (SAKK), Bern, and OSAKO, St Gallen, Switzerland*—M Castiglione, A Goldhirsch, R Maibach, H J Senn, B Thürlimann.  
*Tampere University Hospital, Finland*—M Hakama, K Holli, J Isola, K Rouhento, R Saaristo.  
*Tel Aviv University, Israel*—H Brenner, A Hercbergs.  
*The High-Dose Chemotherapy for Breast Cancer Study Group (PEGASE), France*—A L Martin, H Roché.  
*Tokyo Cancer Institute Hospital, Japan*—M Yoshimoto.  
*Toronto-Edmonton Breast Cancer Study Group, Canada*—A H G Paterson, K I Pritchard.  
*Toronto Princess Margaret Hospital, Canada*—A Fyles, J W Meakin, T Panzarella, K I Pritchard.  
*Tunis Institut Salah Azaiz, Tunisia*—J Bahi.  
*UK Multicentre Cancer Chemotherapy Study Group, London, UK*—M Reid, M Spittle.  
*UK/ANZ DCIS Trial*—H Bishop, N J Bundred, J Cuzick, I O Ellis, I S Fentiman, J F Forbes, S Forsyth, W D George, S E Pinder, I Sestak.  
*UK/Asia Collaborative Breast Cancer Group, London, UK*—G P Deutsch, R Gray, D L W Kwong, V R Pai, R Peto, F Senanayake.  
*University and Istituto Nazionale per la Ricerca sul Cancro, Genoa, Italy on behalf of GROCTA trialists*—F Boccardo, A Rubagotti.  
*University College London, UK*—M Baum, S Forsyth, A Hackshaw, J Houghton, J Ledermann, K Monson, JS Tobias.  
*University Federico II, Naples, Italy*—C Carlomagno, M De Laurentiis, S De Placido.  
*University of Edinburgh, UK*—L Williams.  
*University of Michigan, USA*—D Hayes, L J Pierce.  
*University of Texas MD Anderson Cancer Center, Houston, TX, USA*—K Broglio, A U Buzdar.  
*University of Wisconsin, USA*—R R Love.  
*Uppsala-Örebro Breast Cancer Study Group, Sweden*—J Ahlgren, H Garmo, L Holmberg, G Liljegren, H Lindman, F Wärnberg.  
*U.S. Oncology, Houston, USA*—L Asmar, S E Jones.  
*West German Study Group (WSG), Germany*—O Gluz, N Harbeck, C Liedtke, U Nitz.  
*West of Scotland Breast Trial Group, Glasgow, UK*—A Litton.  
*West Sweden Breast Cancer Study Group, Gothenburg, Sweden*—A Wallgren, P Karlsson, B K Linderholm.  
*Western Cancer Study Group, Torrance, CA, USA*—R T Chlebowski.  
*Würzburg University, Germany*—H Caffier.
